# Supplementary material
Source: HighWire-hosted journal article supplement (https://www.jneurosci.org/content/39/47/9343)
Supplement: inline-supplementary-material-1 [file inline-supplementary-material-1.xlsx]

## Sheet: SignificantGenes_Carmichael_Exo
Table 1-1. Differentially Regulated Genes in OPC Stroke Transcriptome, FDR<0.1, > Log 2 Fold Change
gene	refSeq	entrez	description	Day15_logFC	Day5_logFC	Day15vsDay5_logFC	Day15_PValue	Day5_PValue	Day15vsDay5_PValue	Day15_FDR	Day5_FDR	Day15vsDay5_FDR
Ctsd	NM_009983	13033	cathepsin D	3.28852	2.83255	-0.45597	8.57696e-05	0.000559099	0.552625	0.0162455	0.383054	0.742191
Lyz2	NM_017372	17105	lysozyme 2	3.46003	3.06946	-0.390572	0.000322633	0.00116858	0.655337	0.0312812	0.383054	0.820089
Apoe	NM_009696	11816	apolipoprotein E	3.33214	2.68981	-0.64233	0.000323825	0.00284728	0.449823	0.0312812	0.383054	0.66621
Grlf1	NM_172739	232906	glucocorticoid receptor DNA binding factor 1	4.41501	-0.817144	-5.23216	0.00040619	0.454094	5.585e-05	0.0329348	0.83684	0.0493661
Aqp4	NM_009700	11829	aquaporin 4	5.25822	1.98276	-3.27546	0.000146129	0.0978147	0.00938721	0.022417	0.509131	0.119687
Cx3cr1	NM_009987	13051	chemokine (C-X3-C) receptor 1	4.90431	0.98053	-3.92378	0.000397572	0.408358	0.00298349	0.0329348	0.816981	0.10513
Pnma5	NM_001100461	385377	paraneoplastic antigen family 5	12.9537	-6.48269	-19.4363	2.63199e-07	0.0044453	3.29067e-10	0.00129618	0.383054	6.10815e-06
Plin2	NM_007408	11520	perilipin 2	5.72744	4.15154	-1.5759	0.00170338	0.0142117	0.301147	0.0529496	0.386911	0.525465
Spock2	NM_052994	94214	sparc/osteonectin, cwcv and kazal-like domains proteoglycan 2	5.51967	-1.7434	-7.26307	0.00213108	0.25254	0.000191739	0.0581156	0.689833	0.0770705
Csf1r	NM_001037859	12978	colony stimulating factor 1 receptor	3.7415	1.34093	-2.40056	0.00408345	0.259228	0.0508925	0.0733952	0.698328	0.209613
Fndc3a	NM_207636	319448	fibronectin type III domain containing 3A	5.18185	1.19906	-3.98278	0.000329039	0.327703	0.00346275	0.0313211	0.750015	0.105471
Sirpa	NM_007547	19261	signal-regulatory protein alpha	4.14286	2.28502	-1.85784	0.00216979	0.0666926	0.130125	0.0585732	0.451698	0.334605
Gpr157	NM_177366	269604	G protein-coupled receptor 157	12.6675	7.39348	-5.27403	8.83371e-08	0.000149559	0.00260087	0.00129618	0.340164	0.10513
Sall1	NM_021390	58198	sal-like 1 (Drosophila)	4.9153	-0.723818	-5.63912	0.000465303	0.545497	0.000104785	0.0339429	0.883321	0.066951
Atf7ip	NM_019426	54343	activating transcription factor 7 interacting protein	4.07949	-0.35449	-4.43398	0.00360574	0.774691	0.00186497	0.0702131	0.967458	0.10513
Apobec1	NM_031159	11810	apolipoprotein B mRNA editing enzyme, catalytic polypeptide 1	4.22167	2.35521	-1.86646	0.00266626	0.0688829	0.142352	0.062806	0.454415	0.350038
Ank	NM_020332	11732	progressive ankylosis	4.69675	0.494662	-4.20209	0.00176001	0.701348	0.0041601	0.0538382	0.950458	0.107526
Gapvd1	NM_025709	66691	GTPase activating protein and VPS9 domains 1	4.52834	0.0579463	-4.4704	0.00419339	0.96617	0.00458837	0.0736205	1	0.108858
Bclaf1	NM_153787	72567	BCL2-associated transcription factor 1	3.61517	0.324262	-3.29091	0.00774435	0.791333	0.0138827	0.0917107	0.971412	0.131163
Rph3a	NM_011286	19894	rabphilin 3A	5.22353	-2.08107	-7.30459	0.00244729	0.165137	0.000119027	0.061286	0.603874	0.066951
Slc7a4	NM_144852	224022	solute carrier family 7 (cationic amino acid transporter, y+ system), member 4	9.7957	-5.18592	-14.9816	6.2298e-05	0.0118641	2.86501e-07	0.0134462	0.383054	0.00177268
Wasf3	NM_145155	245880	WAS protein family, member 3	7.92168	0.150724	-7.77096	0.000161779	0.922767	0.00019488	0.0233777	0.999032	0.0770705
Gtf3c5	NM_148928	70239	general transcription factor IIIC, polypeptide 5	4.46788	-1.89874	-6.36663	0.0049884	0.182971	0.000255666	0.0778934	0.628835	0.0832572
Slc8a1	NM_011406	20541	solute carrier family 8 (sodium/calcium exchanger), member 1	4.50086	2.04431	-2.45655	0.00257899	0.127757	0.0713691	0.0620833	0.552882	0.245461
Selplg	NM_009151	20345	selectin, platelet (p-selectin) ligand	5.2083	1.48408	-3.72421	0.000830521	0.264791	0.0103062	0.0428351	0.700311	0.122092
Tmod3	NM_016963	50875	tropomodulin 3	4.84606	2.08734	-2.75872	0.00489927	0.171075	0.0778428	0.077462	0.61352	0.256692
Terf2	NM_009353	21750	telomeric repeat binding factor 2	5.04998	-0.943275	-5.99325	0.00639728	0.549071	0.0019714	0.0848795	0.884633	0.10513
Tbcel	NM_173038	272589	tubulin folding cofactor E-like	4.60172	-0.730504	-5.33223	0.00445298	0.601908	0.00145987	0.0743007	0.909036	0.103582
Zscan22	NM_001001447	232878	zinc finger and SCAN domain containing 22	8.88262	0.786652	-8.09597	8.42158e-05	0.627292	0.000211307	0.0161156	0.919296	0.0781745
Cap1	NM_007598	12331	CAP, adenylate cyclase-associated protein 1 (yeast)	4.85814	1.80711	-3.05104	0.00171231	0.183338	0.0321176	0.0529496	0.629612	0.172302
Bmyc	NM_023326	107771	brain expressed myelocytomatosis oncogene	4.58659	0.478553	-4.10803	0.00438632	0.730667	0.00903147	0.0743007	0.958761	0.118767
Ifit1	NM_008331	15957	interferon-induced protein with tetratricopeptide repeats 1	-5.75085	-2.21553	3.53531	0.000517361	0.116255	0.0177769	0.035334	0.532843	0.141076
Irf8	NM_008320	15900	interferon regulatory factor 8	5.1258	1.78915	-3.33665	0.00116249	0.190061	0.0213929	0.0481108	0.635514	0.14996
Dnahc8	NM_013811	13417	dynein, axonemal, heavy chain 8	7.70245	1.24111	-6.46134	0.000206349	0.430401	0.000993866	0.02588	0.832372	0.103582
Nktr	NM_010918	18087	natural killer tumor recognition sequence	4.15487	1.45972	-2.69515	0.00612109	0.283233	0.0575675	0.0836045	0.713832	0.220733
Ttc18	NM_029698	76670	tetratricopeptide repeat domain 18	9.55546	3.22727	-6.32819	0.000162467	0.0918687	0.00411798	0.0233777	0.501116	0.107526
Rffl	NM_026097	67338	ring finger and FYVE like domain containing protein	-4.72718	-2.89407	1.83311	0.00319989	0.0494567	0.195469	0.0679592	0.423787	0.415144
Btg2	NM_007570	12227	B-cell translocation gene 2, anti-proliferative	5.63229	-0.546278	-6.17857	0.00453179	0.737736	0.00240211	0.0750393	0.959155	0.10513
4632428N05Rik	NM_028732	74048	RIKEN cDNA 4632428N05 gene	8.60152	4.49729	-4.10423	5.01115e-06	0.00409717	0.00743202	0.00300055	0.383054	0.11461
Pvt1	NR_003368	19296	plasmacytoma variant translocation 1	4.6027	-1.0818	-5.6845	0.0065606	0.463148	0.00143111	0.0855249	0.843087	0.103582
Trem2	NM_031254	83433	triggering receptor expressed on myeloid cells 2	10.1903	8.67387	-1.51639	4.66637e-07	5.47303e-06	0.274477	0.00129618	0.0852081	0.49568
Enah	NM_010135	13800	enabled homolog (Drosophila)	5.12718	0.149122	-4.97806	0.0070386	0.925631	0.00839819	0.0883371	0.999541	0.117627
Gria4	NM_019691	14802	glutamate receptor, ionotropic, AMPA4 (alpha 4)	4.67631	-1.1125	-5.78881	0.00376128	0.427385	0.000670097	0.0711799	0.829857	0.103582
P2ry13	NM_028808	74191	purinergic receptor P2Y, G-protein coupled 13	4.97414	0.646523	-4.32761	0.00203394	0.636819	0.00562137	0.0574382	0.923499	0.111349
Ctdsp2	NM_146012	52468	CTD (carboxy-terminal domain, RNA polymerase II, polypeptide A) small phosphatase 2	5.47875	2.39344	-3.08532	0.00108431	0.100416	0.0394306	0.0468067	0.510716	0.188148
Dnmt3a	NM_153743	13435	DNA methyltransferase 3A	4.10821	1.83774	-2.27047	0.00907778	0.1994	0.118221	0.0985063	0.647796	0.317848
Antxr2	NM_133738	71914	anthrax toxin receptor 2	7.01316	2.60855	-4.40461	0.00196512	0.158394	0.02794	0.0564651	0.594322	0.163429
Rsad2	NM_021384	58185	radical S-adenosyl methionine domain containing 2	-7.35703	-3.2303	4.12673	7.06534e-05	0.0342291	0.00960235	0.0142426	0.399779	0.119786
Cflar	NM_207653	12633	CASP8 and FADD-like apoptosis regulator	4.49612	1.77997	-2.71615	0.00382206	0.198889	0.0580615	0.071355	0.647796	0.221894
Tnfrsf21	NM_178589	94185	tumor necrosis factor receptor superfamily, member 21	4.47454	1.65809	-2.81645	0.00432982	0.234313	0.0526571	0.0743007	0.671582	0.212203
4933427D14Rik	NM_028963	74477	RIKEN cDNA 4933427D14 gene	5.13237	-0.737688	-5.87006	0.00716409	0.646974	0.00297752	0.0887157	0.929274	0.10513
Tmem119	NM_146162	231633	transmembrane protein 119	5.58058	3.22712	-2.35345	0.000880393	0.0316655	0.103983	0.0435754	0.396341	0.298321
Rmi1	NR_031761	74386	RMI1, RecQ mediated genome instability 1, homolog (S. cerevisiae)	4.17849	1.28061	-2.89788	0.00751394	0.358627	0.0493585	0.0904256	0.775285	0.207493
Pck2	NM_028994	74551	phosphoenolpyruvate carboxykinase 2 (mitochondrial)	6.57941	-1.80144	-8.38085	0.00150095	0.283192	0.000185642	0.0510337	0.713832	0.0770705
Ly86	NM_010745	17084	lymphocyte antigen 86	4.75691	3.18846	-1.56846	0.00307171	0.0327662	0.264161	0.0662219	0.398845	0.488797
Invs	NM_010569	16348	inversin	5.35629	0.129399	-5.22689	0.00518133	0.935204	0.00604433	0.0787037	1	0.11228
F11r	NM_172647	16456	F11 receptor	4.67018	0.785916	-3.88426	0.00573036	0.590223	0.0170432	0.0818837	0.904609	0.139919
Stx5a	NM_019829	56389	syntaxin 5A	5.04794	0.928617	-4.11932	0.00411221	0.53457	0.0143521	0.0736205	0.876866	0.13277
N4bp1	NM_030563	80750	NEDD4 binding protein 1	5.09377	1.96944	-3.12432	0.00368642	0.197684	0.0507256	0.0709092	0.646479	0.20933
Mtap6	NM_010837	17760	microtubule-associated protein 6	5.22835	-0.829202	-6.05756	0.00782148	0.616131	0.00304381	0.0921114	0.913671	0.10513
Lrig1	NM_008377	16206	leucine-rich repeats and immunoglobulin-like domains 1	5.36818	0.768455	-4.59972	0.00305277	0.611556	0.00843689	0.066198	0.912514	0.117749
A430110N23Rik	NM_173008	269855	RIKEN cDNA A430110N23 gene	9.85487	2.76922	-7.08565	2.96842e-05	0.110226	0.000742762	0.00903275	0.524838	0.103582
Cdca7l	NM_146040	217946	cell division cycle associated 7 like	5.74828	2.37509	-3.3732	0.000843318	0.107728	0.0283133	0.0431231	0.521607	0.16403
Rasa2	NM_053268	114713	RAS p21 protein activator 2	4.96607	0.20387	-4.7622	0.00513797	0.892058	0.00672413	0.0785593	0.994668	0.113549
Ubn1	NM_026666	170644	ubinuclein 1	4.69104	0.937858	-3.75318	0.00439532	0.510212	0.0171723	0.0743007	0.862021	0.140113
Irgm2	NM_019440	54396	immunity-related GTPase family M member 2	-10.7101	-1.92195	8.78818	1.28827e-06	0.201687	1.97459e-05	0.00136699	0.64956	0.0237203
D0H4S114	NM_053078	27528	DNA segment, human D4S114	5.71343	1.09965	-4.61377	0.00246758	0.480747	0.00996429	0.061286	0.850195	0.120973
Slc2a1	NM_011400	20525	solute carrier family 2 (facilitated glucose transporter), member 1	-5.02896	-1.92946	3.09951	0.00324318	0.195451	0.0471349	0.0682139	0.643013	0.203952
Gpr116	NM_001081178	224792	G protein-coupled receptor 116	4.96994	0.977176	-3.99277	0.0055714	0.523296	0.0196092	0.0812834	0.870534	0.145827
Runx1	NM_009821	12394	runt related transcription factor 1	4.86162	2.64981	-2.21181	0.00670964	0.102139	0.164987	0.0866094	0.513139	0.376921
Pank1	NM_023792	75735	pantothenate kinase 1	10.6848	-0.0968545	-10.7817	9.18627e-05	0.958423	8.08894e-05	0.0168827	1	0.0652813
Fam3c	NM_138587	27999	family with sequence similarity 3, member C	9.59029	5.52216	-4.06813	3.72699e-06	0.00153157	0.0118231	0.00240627	0.383054	0.127033
Kcnj2	NM_008425	16518	potassium inwardly-rectifying channel, subfamily J, member 2	6.3519	2.55024	-3.80166	0.000312971	0.0847833	0.0148542	0.0309208	0.488793	0.134101
Kdr	NM_010612	16542	kinase insert domain protein receptor	7.7534	3.48484	-4.26855	0.000581667	0.0596835	0.0259179	0.0371028	0.440016	0.158723
Slc7a8	NM_016972	50934	solute carrier family 7 (cationic amino acid transporter, y+ system), member 8	4.51504	2.3355	-2.17953	0.0088096	0.135567	0.161033	0.0969389	0.563048	0.372102
Uox	NM_009474	22262	urate oxidase	11.1677	2.00585	-9.1618	5.21939e-05	0.29079	0.000330915	0.0127477	0.722098	0.0963253
Fbxl7	NM_176959	448987	F-box and leucine-rich repeat protein 7	17.0704	9.29206	-7.77833	3.9206e-07	0.00137626	0.000659083	0.00129618	0.383054	0.103582
Zfp655	NM_028298	72611	zinc finger protein 655	4.72805	1.61003	-3.11802	0.0080165	0.303247	0.0594128	0.0930014	0.734455	0.224424
Tgfb1i1	NM_009365	21804	transforming growth factor beta 1 induced transcript 1	5.72528	-0.478457	-6.20373	0.00484455	0.773574	0.00283294	0.0771884	0.967458	0.10513
Dnahc11	NM_010060	13411	dynein, axonemal, heavy chain 11	5.94387	1.6055	-4.33837	0.000699783	0.26892	0.00753405	0.0396017	0.700686	0.11461
Rbmx2	NM_173376	209003	RNA binding motif protein, X-linked 2	14.2321	6.3118	-7.92035	1.02847e-06	0.00531777	0.000485679	0.00136361	0.383054	0.103582
Tlr8	NM_133212	170744	toll-like receptor 8	-9.05832	-3.75404	5.30429	0.000111051	0.041394	0.00763101	0.0191797	0.411871	0.114973
C3	NM_009778	12266	complement component 3	7.26173	2.12463	-5.1371	0.000144664	0.161294	0.00298951	0.022377	0.596403	0.10513
Slc25a25	NM_146118	227731	solute carrier family 25 (mitochondrial carrier, phosphate carrier), member 25	10.9103	5.44402	-5.46625	2.91498e-06	0.00371582	0.00299387	0.00216432	0.383054	0.10513
Cpne3	NM_027769	70568	copine III	-5.18975	-1.14293	4.04682	0.00335655	0.445712	0.0157289	0.069101	0.836053	0.13562
Dnaic1	NM_175138	68922	dynein, axonemal, intermediate chain 1	16.9517	7.62951	-9.32215	3.92818e-07	0.00748569	0.000118571	0.00129618	0.383054	0.066951
Blmh	NM_178645	104184	bleomycin hydrolase	11.6844	7.60221	-4.08215	4.54316e-07	0.000138208	0.0139883	0.00129618	0.340164	0.131373
Fasn	NM_007988	14104	fatty acid synthase	-4.38933	-2.33541	2.05392	0.00885188	0.127057	0.175429	0.0969945	0.552203	0.390679
Dnajc1	NM_007869	13418	DnaJ (Hsp40) homolog, subfamily C, member 1	5.18804	-0.30588	-5.49392	0.0025861	0.83219	0.00165994	0.0620998	0.981117	0.10513
Slc17a3	NM_134069	105355	solute carrier family 17 (sodium phosphate), member 3	17.3176	4.96557	-12.3521	1.25717e-06	0.0969185	1.99081e-05	0.00136699	0.509131	0.0237203
Zbtb4	NM_029348	75580	zinc finger and BTB domain containing 4	5.95063	1.79112	-4.15951	0.00597784	0.320037	0.0363142	0.0831568	0.748842	0.181835
Ccdc3	NM_028804	74186	coiled-coil domain containing 3	7.53427	1.59234	-5.94193	0.000945835	0.36496	0.00503149	0.0437937	0.781958	0.109949
Lin7c	NM_011699	22343	lin-7 homolog C (C. elegans)	-5.14376	-1.45793	3.68583	0.00479336	0.349897	0.0303416	0.0771386	0.767232	0.168567
Maf	NM_001025577	17132	avian musculoaponeurotic fibrosarcoma (v-maf) AS42 oncogene homolog	7.79182	4.29445	-3.49737	0.000600872	0.0263505	0.0598545	0.0375535	0.392646	0.225405
Tmem86a	NM_026436	67893	transmembrane protein 86A	6.70546	4.45371	-2.25174	0.000928952	0.014504	0.172575	0.0436537	0.386911	0.386271
Extl2	NM_021388	58193	exostoses (multiple)-like 2	5.3952	1.7491	-3.6461	0.00501323	0.286283	0.0392456	0.0780667	0.717703	0.187946
Slc9a2	NM_001033289	226999	solute carrier family 9 (sodium/hydrogen exchanger), member 2	17.2475	9.87977	-7.36769	5.97218e-07	0.000934794	0.00136612	0.00129618	0.383054	0.103582
Fscn1	NM_007984	14086	fascin homolog 1, actin bundling protein (Strongylocentrotus purpuratus)	-4.94972	-3.11188	1.83783	0.00444225	0.0512072	0.226777	0.0743007	0.426164	0.453275
Lama3	NM_010680	16774	laminin, alpha 3	4.89457	-2.70071	-7.59528	0.00511004	0.0879444	0.000125462	0.0783138	0.494974	0.0684947
Butr1	NA	NA	NA	16.8003	5.13502	-11.6652	8.00879e-07	0.0794446	1.67847e-05	0.00129618	0.475387	0.0237203
Dnalc4	NM_017470	54152	dynein, axonemal, light chain 4	16.7924	11.658	-5.13431	9.07789e-07	0.000153586	0.0132259	0.00129618	0.340164	0.129397
Nat8l	NM_001001985	269642	N-acetyltransferase 8-like	11.295	3.86889	-7.4261	3.31067e-06	0.0322772	0.000331748	0.00227603	0.398845	0.0963253
Creg1	NM_011804	433375	cellular repressor of E1A-stimulated genes 1	4.89609	4.07855	-0.817542	0.00509611	0.0152729	0.583809	0.0782415	0.386911	0.767089
Pde6b	NM_008806	18587	phosphodiesterase 6B, cGMP, rod receptor, beta polypeptide	13.8265	6.38542	-7.44104	2.28028e-06	0.00556437	0.000990564	0.00192394	0.383054	0.103582
Art2b	NM_019915	11872	ADP-ribosyltransferase 2b	17.1823	4.96418	-12.2181	8.75876e-07	0.0940083	1.4784e-05	0.00129618	0.504886	0.0237203
3110035E14Rik	NM_178399	76982	RIKEN cDNA 3110035E14 gene	6.32985	3.18656	-3.14329	0.00606902	0.109417	0.113284	0.0833073	0.523983	0.311107
Pard6b	NM_021409	58220	par-6 (partitioning defective 6) homolog beta (C. elegans)	16.7164	11.4585	-5.25786	7.69529e-07	0.000164932	0.0107844	0.00129618	0.340164	0.123616
Abca3	NM_013855	27410	ATP-binding cassette, sub-family A (ABC1), member 3	-5.38769	-3.76292	1.62478	0.00623309	0.0389321	0.332046	0.0839972	0.410783	0.556318
Cd33	NM_021293	12489	CD33 antigen	5.461	3.42492	-2.03608	0.00224528	0.0348908	0.184024	0.0589488	0.399779	0.402243
Ralb	NM_022327	64143	v-ral simian leukemia viral oncogene homolog B (ras related)	6.3994	2.62181	-3.77759	0.00341139	0.153329	0.0502006	0.0692045	0.585375	0.208882
Igf1	NM_184052	16000	insulin-like growth factor 1	10.7187	10.3827	-0.336001	6.4913e-06	9.8817e-06	0.828791	0.00325653	0.0852081	0.932269
Cuta	NM_026948	67675	cutA divalent cation tolerance homolog (E. coli)	5.12186	0.457619	-4.66424	0.00642533	0.772395	0.011166	0.0849296	0.967187	0.12484
Tspan15	NM_197996	70423	tetraspanin 15	-5.45226	-4.84615	0.606119	0.00551669	0.0110862	0.710102	0.0809492	0.383054	0.858267
Mapk13	NM_011950	26415	mitogen-activated protein kinase 13	17.049	0	-17.049	8.13557e-07	1	2.36349e-07	0.00129618	1	0.00177268
Tbc1d8	NM_018775	54610	TBC1 domain family, member 8	6.83264	2.47557	-4.35707	0.000889725	0.141605	0.0171754	0.0435754	0.572261	0.140113
Slc1a1	NM_009199	20510	solute carrier family 1 (neuronal/epithelial high affinity glutamate transporter, system Xag), member 1	6.50093	0.211132	-6.2898	0.00179082	0.897742	0.00226376	0.0541942	0.995128	0.10513
Ly6a	NM_010738	110454	lymphocyte antigen 6 complex, locus A	-10.1736	-2.05398	8.11967	8.02872e-06	0.195737	0.000115105	0.00346579	0.643057	0.066951
Olfr46	NM_146934	18345	olfactory receptor 46	7.22805	-9.76817	-16.9962	0.00335191	0.000643906	1.24706e-06	0.069101	0.383054	0.00578698
Phactr4	NM_175306	100169	phosphatase and actin regulator 4	-6.26412	-1.76241	4.50171	0.00154993	0.276372	0.0134311	0.0514825	0.709056	0.129778
Mgll	NM_011844	23945	monoglyceride lipase	5.77122	2.70339	-3.06783	0.00155226	0.0876101	0.0559688	0.0514825	0.494141	0.21766
Gm14085	NM_001085518	381417	predicted gene 14085	12.664	5.18223	-7.48173	1.53981e-05	0.0203856	0.00163204	0.00519673	0.386911	0.10513
Ado	NM_001005419	211488	2-aminoethanethiol (cysteamine) dioxygenase	-9.686	-2.68491	7.00109	4.06959e-05	0.118837	0.000932815	0.0111199	0.53788	0.103582
Aim2	NM_001013779	383619	absent in melanoma 2	7.83744	4.41523	-3.42221	0.00136592	0.0348356	0.0858642	0.0500208	0.399779	0.270279
Dlc1	NM_015802	50768	deleted in liver cancer 1	-9.4203	-5.69385	3.72644	0.000137369	0.00652002	0.0533812	0.0216089	0.383054	0.213533
Mkrn3	NM_011746	22652	makorin, ring finger protein, 3	8.71155	-4.89094	-13.6025	0.000847481	0.0304436	1.30197e-05	0.0431972	0.393529	0.0237203
Gatc	NM_029645	384281	glutamyl-tRNA(Gln) amidotransferase, subunit C homolog (bacterial)	6.31898	2.14245	-4.17653	0.00104168	0.179554	0.0163427	0.0461801	0.625072	0.137032
Man1c1	NM_207237	230815	mannosidase, alpha, class 1C, member 1	9.8995	8.62679	-1.27271	1.15102e-05	5.99523e-05	0.41184	0.0046446	0.23872	0.628356
Tada3	NM_133932	101206	transcriptional adaptor 3	5.67836	0.464959	-5.2134	0.00711464	0.788153	0.0114971	0.0885143	0.969946	0.125683
Usp22	NM_001004143	216825	ubiquitin specific peptidase 22	-5.7724	-0.323217	5.44918	0.00354909	0.840949	0.00519528	0.0698603	0.982838	0.111103
Plekho2	NM_153119	102595	pleckstrin homology domain containing, family O member 2	4.96647	4.11906	-0.847414	0.0065498	0.018881	0.585724	0.0855249	0.386911	0.768898
Gabpa	NM_008065	14390	GA repeat binding protein, alpha	-6.57111	-2.43123	4.13988	0.00345705	0.190331	0.0388402	0.0692265	0.635514	0.18692
Sec22b	NM_011342	20333	SEC22 vesicle trafficking protein homolog B (S. cerevisiae)	7.00635	2.83619	-4.17016	0.00176057	0.124702	0.0332693	0.0538382	0.547998	0.175688
Gm4894	NM_177701	235327	predicted gene 4894	16.8521	9.18076	-7.67138	6.29101e-06	0.00376307	0.00279448	0.00325653	0.383054	0.10513
Niacr1	NM_030701	80885	niacin receptor 1	16.8479	9.43103	-7.41683	1.40643e-06	0.00173718	0.00164026	0.00137401	0.383054	0.10513
Mir219-2	NR_029838	407003	microRNA 219-2	-16.8674	0.129801	-129.948	0.00639763	0.930581	0.00600515	0.0918999	0.985189	0.178864
Shmt2	NM_028230	108037	serine hydroxymethyltransferase 2 (mitochondrial)	6.89517	3.27107	-3.6241	0.00495441	0.114404	0.0847133	0.0778035	0.529695	0.268107
Ecm1	NM_007899	13601	extracellular matrix protein 1	-8.81777	-3.32731	5.49046	0.000268685	0.0769374	0.00866091	0.0297351	0.471248	0.118263
Stk10	NM_009288	20868	serine/threonine kinase 10	6.35095	2.0582	-4.29275	0.00121318	0.20354	0.015812	0.0484071	0.652718	0.135693
Ehf	NM_007914	13661	ets homologous factor	13.5602	7.05485	-6.50532	6.48043e-06	0.00373696	0.00380895	0.00325653	0.383054	0.106221
C2cd4c	NM_198614	237397	C2 calcium-dependent domain containing 4C	9.87743	-3.14197	-13.0194	0.000265479	0.132433	1.74391e-05	0.0297351	0.560234	0.0237203
Cpne9	NM_170673	211232	copine family member IX	16.7706	10.2185	-6.55206	7.60665e-06	0.00165894	0.00765956	0.00343024	0.383054	0.115027
Atg4c	NM_175029	242557	autophagy-related 4C (yeast)	-6.8397	-3.48087	3.35884	0.00233159	0.0692413	0.0787192	0.0598603	0.454415	0.258114
Nlrp1b	NM_001162414	637515	NLR family, pyrin domain containing 1B	5.16246	1.23638	-3.92609	0.00726582	0.450007	0.030264	0.0889252	0.836053	0.168466
Cxcl16	NM_023158	66102	chemokine (C-X-C motif) ligand 16	-6.39229	-0.910983	5.4813	0.00184031	0.576904	0.00532699	0.0549635	0.897832	0.11111
Nhedc2	NM_178877	97086	Na+/H+ exchanger domain containing 2	-7.95971	-7.47457	0.485137	0.00397232	0.00571581	0.812992	0.0724304	0.383054	0.924016
Nudt9	NM_028794	74167	nudix (nucleoside diphosphate linked moiety X)-type motif 9	8.33151	3.89372	-4.43779	0.00107944	0.0615382	0.0372523	0.0467268	0.441701	0.183949
Fgfr1op	NM_201230	75296	Fgfr1 oncogene partner	7.34358	3.59724	-3.74635	0.00123846	0.059733	0.0509884	0.0486353	0.440016	0.209679
Slc40a1	NM_016917	53945	solute carrier family 40 (iron-regulated transporter), member 1	7.12653	2.35741	-4.76912	0.00122254	0.18422	0.0155939	0.0484071	0.631135	0.135459
Slc44a2	NM_152808	68682	solute carrier family 44, member 2	5.13519	3.50145	-1.63374	0.0081137	0.0511968	0.327396	0.0935341	0.426164	0.551362
Olfr541	NM_146962	258964	olfactory receptor 541	16.6645	11.3068	-5.35774	1.24883e-05	0.000839954	0.024149	0.00493207	0.383054	0.155644
Scamp5	NM_020270	56807	secretory carrier membrane protein 5	-5.10401	-1.59157	3.51244	0.00859325	0.340787	0.0512325	0.0959157	0.759661	0.210068
Cramp1l	NM_020608	57354	Crm, cramped-like (Drosophila)	-5.53979	-1.0292	4.51059	0.00614579	0.540106	0.019128	0.0836045	0.880583	0.144476
Slfn2	NM_011408	20556	schlafen 2	-9.00147	-2.26962	6.73185	0.000101803	0.183879	0.00138615	0.0179968	0.630667	0.103582
Plcxd3	NM_177355	239318	phosphatidylinositol-specific phospholipase C, X domain containing 3	11.9666	3.20133	-8.76531	0.000116603	0.147385	0.00135453	0.0194989	0.57607	0.103582
Txnl1	NM_016792	53382	thioredoxin-like 1	5.25991	2.3143	-2.94561	0.00578565	0.165505	0.0849797	0.0819783	0.604337	0.268582
Ezh2	NM_007971	14056	enhancer of zeste homolog 2 (Drosophila)	5.73762	1.65473	-4.08289	0.00566173	0.340585	0.0330466	0.0815816	0.759484	0.17526
Kbtbd11	NM_029116	74901	kelch repeat and BTB (POZ) domain containing 11	-6.07964	-3.08942	2.99022	0.00478983	0.0988046	0.10902	0.0771386	0.509131	0.305654
Lass3	NM_001164201	545975	LAG1 homolog, ceramide synthase 3	16.6155	6.72423	-9.89126	2.18993e-06	0.0229393	0.000175536	0.00192394	0.386911	0.0770705
Kctd20	NM_025888	66989	potassium channel tetramerisation domain containing 20	6.60822	1.88802	-4.7202	0.00447967	0.316206	0.0263846	0.0745213	0.745258	0.159841
Rft1	NM_177815	328370	RFT1 homolog (S. cerevisiae)	16.1754	10.4579	-5.71749	6.7333e-06	0.00100935	0.0123714	0.00328904	0.383054	0.127365
Dnase2b	NM_019957	56629	deoxyribonuclease II beta	12.0295	-0.9148	-12.9443	2.51325e-05	0.662306	9.63291e-06	0.00804327	0.935524	0.0237203
Slc16a14	NM_027921	71781	solute carrier family 16 (monocarboxylic acid transporters), member 14	-16.3893	-5.98386	10.4054	1.86711e-06	0.00611032	0.000658299	0.00173286	0.383054	0.103582
Pik3r5	NM_177320	320207	phosphoinositide-3-kinase, regulatory subunit 5, p101	6.80127	5.74135	-1.05992	0.00143072	0.00471591	0.52578	0.0502975	0.383054	0.72008
Rnf139	NM_175226	75841	ring finger protein 139	-5.58327	-2.3074	3.27588	0.00613995	0.188426	0.0731267	0.0836045	0.635514	0.24865
Tcof1	NM_011552	21453	Treacher Collins Franceschetti syndrome 1, homolog	-6.55012	-4.85535	1.69477	0.00152782	0.0108447	0.31046	0.0513107	0.383054	0.535374
1810041L15Rik	NM_001163145	72301	RIKEN cDNA 1810041L15 gene	12.2179	-0.549282	-12.7671	3.8265e-05	0.795873	2.04463e-05	0.0109273	0.971917	0.0237203
Ddx58	NM_172689	230073	DEAD (Asp-Glu-Ala-Asp) box polypeptide 58	-5.6914	-2.6628	3.0286	0.00709425	0.147004	0.104689	0.0885143	0.575429	0.299674
Arhgef6	NM_152801	73341	Rac/Cdc42 guanine nucleotide exchange factor (GEF) 6	6.47744	5.28858	-1.18886	0.00245525	0.00894884	0.485704	0.061286	0.383054	0.69043
Fam116b	NM_027081	69440	family with sequence similarity 116, member B	10.8777	4.99631	-5.88138	0.000127236	0.0252874	0.0103384	0.0207171	0.392646	0.122092
Mmadhc	NM_133839	109129	methylmalonic aciduria (cobalamin deficiency) cblD type, with homocystinuria	-15.9587	-2.10894	13.8498	7.8335e-07	0.220992	7.9257e-06	0.00129618	0.664611	0.0237203
Hps5	NM_001167864	246694	Hermansky-Pudlak syndrome 5 homolog (human)	5.70051	3.37519	-2.32532	0.00480568	0.0625119	0.179354	0.0771386	0.443218	0.396236
Cx3cl1	NM_009142	20312	chemokine (C-X3-C motif) ligand 1	-10.962	-4.44162	6.52036	0.000130048	0.0390058	0.00674737	0.0209909	0.410783	0.113549
Sele	NM_011345	20339	selectin, endothelial cell	16.4921	10.5995	-5.89257	3.75939e-06	0.000766585	0.00938826	0.00240627	0.383054	0.119687
Abcf1	NM_013854	224742	ATP-binding cassette, sub-family F (GCN20), member 1	5.57713	1.0263	-4.55082	0.00861708	0.56063	0.024308	0.0960662	0.889945	0.155695
Fshr	NM_013523	14309	follicle stimulating hormone receptor	-16.3215	-7.52783	8.79363	1.52285e-05	0.00386183	0.00632991	0.00519673	0.383054	0.112886
Ptgs2	NM_008969	19224	prostaglandin-endoperoxide synthase 1	8.24719	5.53692	-2.71027	0.000448731	0.00786159	0.136638	0.0337218	0.383054	0.342972
F2r	NM_010169	14062	coagulation factor II (thrombin) receptor	6.59178	2.27821	-4.31357	0.00185836	0.190933	0.0232	0.0550041	0.635514	0.15358
3010026O09Rik	NM_026543	68067	RIKEN cDNA 3010026O09 gene	-16.2921	-6.21852	10.0735	1.3256e-06	0.00401393	0.000755991	0.00136699	0.383054	0.103582
Prss48	NM_001001650	368202	protease, serine, 48	16.4562	10.2999	-6.15623	2.41202e-06	0.000809821	0.00605497	0.0019466	0.383054	0.11228
BC017158	NM_145590	233913	cDNA sequence BC017158	7.7428	5.39978	-2.34302	0.00313135	0.0219558	0.25215	0.0672732	0.386911	0.474254
Crkl	NM_007764	12929	v-crk sarcoma virus CT10 oncogene homolog (avian)-like	-5.33088	-0.835413	4.49547	0.00818642	0.620127	0.0203159	0.0939162	0.91563	0.147019
Gla	NM_013463	11605	galactosidase, alpha	-5.72311	2.47785	8.20095	0.00748096	0.176188	0.000586839	0.0902111	0.619226	0.103582
Ccr7	NM_007719	12775	chemokine (C-C motif) receptor 7	9.83323	0.918251	-8.91498	0.000319535	0.632201	0.000694995	0.0312169	0.921277	0.103582
Ankrd50	NM_001167883	99696	ankyrin repeat domain 50	8.92732	4.86737	-4.05994	0.000400727	0.021016	0.0442366	0.0329348	0.386911	0.198674
Atp2b2	NM_009723	11941	ATPase, Ca++ transporting, plasma membrane 2	-6.96096	-2.88591	4.07505	0.00340493	0.141794	0.0497181	0.0692005	0.572261	0.208025
Tstd2	NM_173033	272027	thiosulfate sulfurtransferase (rhodanese)-like domain containing 2	5.81664	4.45641	-1.36022	0.00631851	0.0256215	0.439513	0.0844988	0.392646	0.656389
Ypel5	NM_027166	383295	yippee-like 5 (Drosophila)	-7.97118	-0.933324	7.03786	0.00124457	0.609652	0.0030077	0.0486353	0.9114	0.10513
Fam171a1	NM_001081161	269233	family with sequence similarity 171, member A1	-15.8044	-2.02318	13.7813	1.16468e-06	0.243894	1.02641e-05	0.00136699	0.681339	0.0237203
2700078E11Rik	NM_030197	78832	RIKEN cDNA 2700078E11 gene	-12.1342	-0.899533	11.2346	1.53149e-05	0.603092	3.86242e-05	0.00519673	0.909462	0.0377338
Gimap4	NM_175048	107526	GTPase, IMAP family member 4	12.9999	9.48503	-3.51487	3.16245e-05	0.000680709	0.0889982	0.00946797	0.383054	0.275838
Gng4	NM_010317	14706	guanine nucleotide binding protein (G protein), gamma 4	16.297	8.33515	-7.96189	3.29962e-06	0.00547232	0.00116454	0.00227603	0.383054	0.103582
Spata19	NM_029299	75469	spermatogenesis associated 19	16.3325	6.39957	-9.93291	1.29128e-05	0.0387005	0.000519097	0.0049935	0.410783	0.103582
Csf2	NM_009969	12981	colony stimulating factor 2 (granulocyte-macrophage)	16.8984	15.8938	1.0632	0.00661146	0.00842777	0.861951	0.0938826	0.191125	0.998906
Tpd52l2	NM_025482	66314	tumor protein D52-like 2	-8.9518	-0.892557	8.05924	0.000417033	0.619113	0.000992408	0.0333662	0.915257	0.103582
Pdcd1lg2	NM_021396	58205	programmed cell death 1 ligand 2	16.2956	9.78695	-6.50866	4.20653e-06	0.00156536	0.0051571	0.00260272	0.383054	0.111051
Fbxw5	NM_013908	30839	F-box and WD-40 domain protein 5	6.8332	2.719	-4.1142	0.00477685	0.174658	0.0532628	0.0770356	0.616379	0.213533
Fam82b	NM_025476	66302	family with sequence similarity 82, member B	6.56756	2.39826	-4.1693	0.00457115	0.210309	0.0435846	0.075317	0.659764	0.197162
Stard3	NM_021547	59045	START domain containing 3	7.91476	4.33681	-3.57796	0.000406318	0.0226011	0.0501796	0.0329348	0.386911	0.208842
Gm5592	NM_001033782	434172	predicted gene 5592	7.80399	-1.15326	-8.95725	0.00296529	0.561674	0.00113775	0.065017	0.890204	0.103582
Ube4a	NM_145400	140630	ubiquitination factor E4A, UFD2 homolog (S. cerevisiae)	-7.40293	-1.45362	5.94932	0.00148933	0.417512	0.00641209	0.051004	0.8247	0.112886
Il12b	NM_008352	16160	interleukin 12b	12.0759	4.44928	-7.62666	1.03673e-05	0.0323059	0.000792452	0.00435001	0.398845	0.103582
Bach2	NM_001109661	12014	BTB and CNC homology 2	-5.62195	-3.20803	2.41392	0.00741813	0.0867158	0.183371	0.0898484	0.493143	0.401384
Gbp2	NM_010260	14469	guanylate binding protein 2	-7.4927	-1.85375	5.63894	0.0017931	0.319261	0.0105917	0.0541942	0.748301	0.122785
Igfbp4	NM_010517	16010	insulin-like growth factor binding protein 4	16.2107	11.321	-4.88964	1.43802e-05	0.000735718	0.0331322	0.00519673	0.383054	0.175416
Bnc2	NM_172870	242509	basonuclin 2	16.1376	10.0778	-6.05982	7.76156e-06	0.00148627	0.00950926	0.00343024	0.383054	0.119786
Cdo1	NM_033037	12583	cysteine dioxygenase 1, cytosolic	-15.6133	-1.9563	13.657	2.57813e-06	0.272442	1.88989e-05	0.00199397	0.704622	0.0237203
Lass5	NM_028015	71949	LAG1 homolog, ceramide synthase 5	-10.9533	-1.45401	9.49927	5.80262e-05	0.416417	0.000245829	0.0131351	0.823553	0.0814834
Slc11a1	NM_013612	18173	solute carrier family 11 (proton-coupled divalent metal ion transporters), member 1	7.06933	4.21963	-2.8497	0.00142328	0.0297092	0.117151	0.0502325	0.393529	0.316437
Pex19	NM_023041	19298	peroxisomal biogenesis factor 19	-8.44262	-2.07334	6.36928	0.000409034	0.246021	0.00356524	0.0330108	0.681339	0.105473
Pxmp3	NA	NA	NA	7.93152	4.67242	-3.25909	0.000946777	0.0239065	0.0912271	0.0437937	0.386911	0.280125
Mir546	NR_030259	723882	microRNA 546	9.20923	5.50432	-3.70491	0.00026407	0.0106021	0.0588645	0.0297351	0.383054	0.223673
Ppfia3	NM_029741	76787	protein tyrosine phosphatase, receptor type, f polypeptide (PTPRF), interacting protein (liprin), alpha 3	-6.89621	-9.16754	-2.27133	0.00378355	0.000472882	0.241391	0.071355	0.383054	0.465043
Cobra1	NM_021393	58202	cofactor of BRCA1	6.30726	2.68328	-3.62398	0.00854509	0.18592	0.0860164	0.0955506	0.632753	0.270433
Itih5l	NA	NA	NA	-11.8446	-4.3765	7.46806	2.78613e-05	0.031356	0.00202514	0.00861934	0.394474	0.10513
Siglech	NM_178706	233274	sialic acid binding Ig-like lectin H	7.28342	4.36107	-2.92234	0.00126788	0.0271886	0.112582	0.0490671	0.392646	0.31005
Narfl	NM_026238	67563	nuclear prelamin A recognition factor-like	7.04237	2.67288	-4.36948	0.00387859	0.180488	0.0420101	0.0717791	0.626089	0.19393
Cntln	NM_177385	338349	centlein, centrosomal protein	7.5664	3.30125	-4.26515	0.00142617	0.0904592	0.0357887	0.0502325	0.499477	0.180709
Nck2	NM_010879	17974	non-catalytic region of tyrosine kinase adaptor protein 2	7.58057	1.39017	-6.1904	0.00114532	0.436976	0.00463889	0.0481108	0.836053	0.108858
Abi2	NM_198127	329165	abl-interactor 2	-6.91118	-0.663382	6.2478	0.00245196	0.707009	0.00477403	0.061286	0.952759	0.108998
Trim8	NM_053100	93679	tripartite motif-containing 8	-5.42752	-3.92445	1.50307	0.00879945	0.0417265	0.391263	0.0969389	0.412528	0.607293
Errfi1	NM_133753	74155	ERBB receptor feedback inhibitor 1	-11.4588	-2.49257	8.9662	3.96219e-05	0.181699	0.000454882	0.0111199	0.62717	0.103582
Slc38a1	NM_134086	105727	solute carrier family 38, member 1	-7.21845	0.0567915	7.27524	0.00260981	0.975117	0.00247378	0.0623674	1	0.10513
Pigz	NM_172822	239827	phosphatidylinositol glycan anchor biosynthesis, class Z	-15.3592	-1.49999	13.8592	7.25828e-06	0.412773	2.97747e-05	0.00343024	0.81998	0.0307043
Zfp526	NM_175436	210172	zinc finger protein 526	-15.9395	-7.92546	8.01408	5.75051e-06	0.0013247	0.00825977	0.00323458	0.383054	0.117345
Arhgap25	NM_175476	232201	Rho GTPase activating protein 25	7.77093	7.48206	-0.288871	0.00217838	0.00281299	0.877784	0.0585732	0.383054	0.959392
Rab33b	NM_016858	19338	RAB33B, member of RAS oncogene family	-11.8259	-0.916041	10.9098	4.63143e-05	0.61318	0.000109879	0.0117765	0.912987	0.066951
Cox6a1	NM_007748	12861	cytochrome c oxidase, subunit VI a, polypeptide 1	-5.73301	-0.857642	4.87537	0.00772082	0.626996	0.0183048	0.0916329	0.91929	0.143052
Ldlrap1	NM_145554	100017	low density lipoprotein receptor adaptor protein 1	-11.0206	-1.08975	9.93081	6.79716e-05	0.544799	0.000194538	0.0138647	0.882962	0.0770705
Chst15	NM_029935	77590	carbohydrate (N-acetylgalactosamine 4-sulfate 6-O) sulfotransferase 15	-11.7975	-4.89478	6.90268	8.99814e-05	0.0281638	0.00616971	0.0167023	0.393529	0.112553
5330437I02Rik	NM_177028	319888	RIKEN cDNA 5330437I02 gene	16.0414	6.07006	-9.97129	1.68592e-05	0.0493879	0.000513091	0.00558822	0.423787	0.103582
Cnpy3	NM_028065	72029	canopy 3 homolog (zebrafish)	5.73227	3.79279	-1.93948	0.00894779	0.0579856	0.294371	0.0975072	0.437526	0.517483
Fbxo32	NM_026346	67731	F-box protein 32	7.08362	4.6031	-2.48052	0.00193966	0.023838	0.179156	0.056081	0.386911	0.395892
Naip6	NM_010871	17952	NLR family, apoptosis inhibitory protein 6	5.89234	3.45787	-2.43447	0.00610271	0.0711327	0.183745	0.0835144	0.457099	0.401871
Mndal	NM_001170853	100040462	myeloid nuclear differentiation antigen like	-6.59721	-0.601964	5.99525	0.0045729	0.741305	0.00807645	0.075317	0.960728	0.116987
Nploc4	NM_199469	217365	nuclear protein localization 4 homolog (S. cerevisiae)	-9.81522	-1.23876	8.57645	0.000172986	0.489764	0.000584568	0.0238013	0.851211	0.103582
Nod1	NM_172729	107607	nucleotide-binding oligomerization domain containing 1	-10.6861	-3.42275	7.26336	9.8577e-05	0.0837402	0.00254662	0.0178994	0.485579	0.10513
Paxip1	NM_018878	55982	PAX interacting (with transcription-activation domain) protein 1	-7.27091	-2.28952	4.98139	0.00181926	0.216852	0.0176244	0.0547225	0.663827	0.140647
Rorc	NM_011281	19885	RAR-related orphan receptor gamma	-15.8296	-6.6158	9.21384	0.000118429	0.0177632	0.0088644	0.0196274	0.386911	0.118263
Zfyve27	NM_177319	319740	zinc finger, FYVE domain containing 27	-9.19807	-3.90813	5.28994	0.000411701	0.0557527	0.0162474	0.0330822	0.435121	0.136977
Snx3	NM_017472	54198	sorting nexin 3	-9.38957	-0.522965	8.86661	0.000442743	0.777172	0.00071194	0.0337218	0.967458	0.103582
Ttll9	NM_029064	74711	tubulin tyrosine ligase-like family, member 9	6.7998	0.629217	-6.17058	0.00825074	0.754666	0.0135015	0.0942463	0.96488	0.130066
Mms19	NM_028152	72199	MMS19 (MET18 S. cerevisiae)	-9.71751	-0.763404	8.95411	0.000431892	0.684857	0.000847347	0.0337218	0.945787	0.103582
D330038O06Rik	NA	NA	NA	-15.5794	-2.88627	12.6932	5.47325e-06	0.132139	8.49382e-05	0.00317483	0.559871	0.0656926
Suv420h2	NM_146177	232811	suppressor of variegation 4-20 homolog 2 (Drosophila)	9.11497	1.25816	-7.85681	0.000896791	0.526325	0.00250466	0.0435941	0.872078	0.10513
Naip7	NM_021545	53880	NLR family, apoptosis inhibitory protein 7	7.18875	4.49135	-2.6974	0.00256494	0.0327522	0.163061	0.0620518	0.398845	0.37552
Mug-ps1	NR_027619	17835	murinoglobulin, pseudogene 1	12.6595	8.21796	-4.44156	0.000134513	0.00400721	0.0558246	0.0213405	0.383054	0.217556
Slc25a4	NM_007450	11739	solute carrier family 25 (mitochondrial carrier, adenine nucleotide translocator), member 4	-7.86668	-0.146571	7.72011	0.00190195	0.937473	0.00216749	0.0555969	1	0.10513
Ccne2	NM_009830	12448	cyclin E2	-8.92345	-5.16944	3.75402	0.000928279	0.0229804	0.0797417	0.0436537	0.386911	0.259986
Cachd1	NM_198037	320508	cache domain containing 1	-7.12302	-4.23047	2.89255	0.00419979	0.0512403	0.157742	0.0736205	0.426164	0.368452
Fam96b	NM_026753	68523	family with sequence similarity 96, member B	10.4324	5.35465	-5.07779	0.000612467	0.0306158	0.0345744	0.0377453	0.393529	0.177833
Stx6	NM_021433	58244	syntaxin 6	-6.80685	-2.22658	4.58027	0.0053283	0.260687	0.0374757	0.0799547	0.700311	0.184174
Itgb4	NM_133663	192897	integrin beta 4	-6.26195	-3.69976	2.56219	0.00599686	0.0663522	0.183032	0.0831568	0.451194	0.400926
Oxsr1	NR_045693	108737	oxidative-stress responsive 1	-8.28974	-2.38821	5.90153	0.00136785	0.226939	0.011361	0.0500208	0.664611	0.124997
B3gnt7	NM_145222	227327	UDP-GlcNAc:betaGal beta-1,3-N-acetylglucosaminyltransferase 7	15.8493	8.80812	-7.04117	1.40795e-05	0.00510017	0.00473456	0.00519673	0.383054	0.108954
Mctp2	NM_001024703	244049	multiple C2 domains, transmembrane 2	-15.7477	-5.84535	9.90235	5.0988e-05	0.0209206	0.00367441	0.0126192	0.386911	0.106093
Tfdp2	NM_178667	211586	transcription factor Dp 2	-8.21511	-3.05477	5.16034	0.000825687	0.113883	0.0160975	0.0428351	0.529079	0.136424
Eml1	NM_001043336	68519	echinoderm microtubule associated protein like 1	-11.4373	-1.02732	10.41	8.89418e-05	0.578316	0.000227423	0.0166761	0.898775	0.0781745
Rilpl1	NM_021430	75695	Rab interacting lysosomal protein-like 1	9.33774	5.18933	-4.1484	0.000448751	0.0197512	0.0482534	0.0337218	0.386911	0.205558
Runx3	NM_019732	12399	runt related transcription factor 3	-15.6122	-3.72895	11.8833	6.34523e-06	0.0635004	0.000206674	0.00325653	0.44431	0.0781745
Enho	NM_027147	69638	energy homeostasis associated	15.4559	10.5981	-4.85778	4.07366e-05	0.0016829	0.0391995	0.0111199	0.383054	0.187807
Pde10a	NM_011866	23984	phosphodiesterase 10A	-15.4247	-2.9675	12.4572	1.35449e-05	0.139184	0.000182568	0.00513104	0.567187	0.0770705
Slc38a5	NM_172479	209837	solute carrier family 38, member 5	-15.6627	-4.00358	11.6592	5.44697e-05	0.0842555	0.00100663	0.0128739	0.487364	0.103582
Bub3	NM_009774	12237	budding uninhibited by benzimidazoles 3 homolog (S. cerevisiae)	-8.8487	-2.04593	6.80277	0.000659325	0.28423	0.00432315	0.0388378	0.715276	0.108049
Rph3al	NM_029548	380714	rabphilin 3A-like (without C2 domains)	15.8803	6.28688	-9.59343	4.54462e-05	0.0485835	0.00130219	0.0117163	0.423787	0.103582
Mett10d	NA	NA	NA	6.2981	2.36155	-3.93655	0.00882237	0.24003	0.0668837	0.0969945	0.678966	0.238696
Ryr1	NM_009109	20190	ryanodine receptor 1, skeletal muscle	6.47064	1.14222	-5.32842	0.00693704	0.551201	0.0188991	0.0878344	0.8859	0.143905
Slc5a2	NM_133254	246787	solute carrier family 5 (sodium/glucose cotransporter), member 2	15.0061	13.393	-1.61311	6.02168e-05	0.00020419	0.433491	0.0134462	0.344561	0.650073
Herc5	NA	NA	NA	-6.51843	-1.11648	5.40195	0.00453924	0.540305	0.0132565	0.0750957	0.88083	0.129459
Reep1	NM_178608	52250	receptor accessory protein 1	7.41143	4.5325	-2.87893	0.00646742	0.057121	0.191347	0.0852163	0.437526	0.411896
Gm5415	NM_001164286	408191	predicted gene 5415	15.8584	10.0351	-5.82325	2.40551e-05	0.00234416	0.0167198	0.00783354	0.383054	0.138647
Gpc4	NM_008150	14735	glypican 4	-15.4802	-2.74779	12.7324	1.52566e-05	0.17108	0.00016203	0.00519673	0.61352	0.0763097
D2Ertd750e	NM_026412	51944	DNA segment, Chr 2, ERATO Doi 750, expressed	12.1486	7.73543	-4.41317	0.000156008	0.00511336	0.0530287	0.0229826	0.383054	0.212872
Gbp1	NM_010259	14468	guanylate binding protein 1	8.3046	1.47703	-6.82758	0.00393105	0.492676	0.0112955	0.0721742	0.853858	0.12484
Fbxo3	NM_212433	57443	F-box protein 3	-10.9908	-1.84603	9.14478	0.000190144	0.346662	0.000919171	0.0246815	0.764146	0.103582
Cdkn2b	NM_007670	12579	cyclin-dependent kinase inhibitor 2B (p15, inhibits CDK4)	15.7401	10.754	-4.9861	7.55803e-06	0.000675372	0.0219353	0.00343024	0.383054	0.151342
Dock5	NM_177780	68813	dedicator of cytokinesis 5	-6.63179	-0.826884	5.8049	0.00494935	0.655519	0.010613	0.0777899	0.933378	0.122785
Irf1	NM_008390	16362	interferon regulatory factor 1	-6.40552	-2.67374	3.73178	0.00923439	0.195562	0.0855977	0.0995405	0.643028	0.269665
BC024582	NR_026843	414068	cDNA sequence BC024582	-10.0299	-4.42503	5.60488	0.000514927	0.0487492	0.0197753	0.035334	0.423787	0.146022
Fosl2	NM_008037	14284	fos-like antigen 2	-9.66356	0.813342	10.4769	0.000636412	0.672651	0.000320409	0.0384791	0.939767	0.0963253
Ppm1g	NM_008014	14208	protein phosphatase 1G (formerly 2C), magnesium-dependent, gamma isoform	-6.53582	-1.05634	5.47948	0.00571569	0.573103	0.0149575	0.0818	0.89545	0.134385
Carhsp1	NM_025821	52502	calcium regulated heat stable protein 1	-6.76118	-0.648826	6.11236	0.00647586	0.73737	0.0112327	0.0852163	0.959011	0.12484
Cog6	NM_026225	67542	component of oligomeric golgi complex 6	-8.65464	-1.96811	6.68653	0.00105215	0.313613	0.00593142	0.0462163	0.743395	0.111889
Tspan5	NM_019571	56224	tetraspanin 5	-10.9567	-2.09909	8.85766	0.000402025	0.314301	0.00203858	0.0329348	0.743949	0.10513
Ralbp1	NM_009067	19765	ralA binding protein 1	-7.76468	-0.352552	7.41213	0.00272822	0.854434	0.00368115	0.0630303	0.985598	0.106093
Snai2	NM_011415	20583	snail homolog 2 (Drosophila)	15.6789	0	-15.6789	1.05458e-05	1	3.52971e-06	0.00435001	1	0.0131037
St6galnac6	NM_016973	50935	ST6 (alpha-N-acetyl-neuraminyl-2,3-beta-galactosyl-1,3)-N-acetylgalactosaminide alpha-2,6-sialyltransferase 6	7.21503	3.48845	-3.72658	0.00695979	0.1212	0.10002	0.087899	0.540904	0.293435
Mcm5	NM_008566	17218	minichromosome maintenance deficient 5, cell division cycle 46 (S. cerevisiae)	10.3415	8.20602	-2.13544	0.00078268	0.00385533	0.316761	0.0413069	0.383054	0.539711
Gnpda1	NM_011937	26384	glucosamine-6-phosphate deaminase 1	10.499	7.11024	-3.38874	0.000339697	0.00561943	0.111269	0.0316857	0.383054	0.308265
Mtap1s	NM_173013	270058	microtubule-associated protein 1S	10.4663	7.08555	-3.38077	0.000193058	0.00399948	0.0972452	0.0248857	0.383054	0.288949
Kntc1	NM_001042421	208628	kinetochore associated 1	-8.5986	-4.14519	4.45342	0.00162233	0.0619647	0.0495714	0.0523717	0.441701	0.207708
Ttc15	NM_178811	217449	tetratricopeptide repeat domain 15	-9.42011	1.90393	11.324	0.00135572	0.352937	0.000302145	0.0499424	0.770097	0.0934736
Cdkl2	NM_177270	53886	cyclin-dependent kinase-like 2 (CDC2-related kinase)	-11.4038	-5.06352	6.34025	0.00017085	0.0273708	0.0116048	0.0238013	0.392646	0.126361
C330018D20Rik	NM_029909	77422	RIKEN cDNA C330018D20 gene	7.19166	2.64969	-4.54197	0.00221578	0.165755	0.0284518	0.0586577	0.604337	0.16435
Zfp169	NM_026450	67911	zinc finger protein 169	8.16051	4.36043	-3.80008	0.00153577	0.0444425	0.0706198	0.0513639	0.418207	0.244528
Cd83	NM_009856	12522	CD83 antigen	7.24318	4.5576	-2.68558	0.00218953	0.0291434	0.159979	0.0585732	0.393529	0.370636
2310046A06Rik	NM_027150	69642	RIKEN cDNA 2310046A06 gene	-9.95686	-15.4911	-5.53426	0.000743312	1.37714e-05	0.0345731	0.0405218	0.0852081	0.177833
Gm9079	NR_004052	668272	transmembrane emp24 domain trafficking protein 2 pseudogene	-0.239855	-14.462	-14.2222	0.915697	0.000195555	0.000225771	1	0.344561	0.0781745
Cdh29	NA	NA	NA	9.03136	0.731015	-8.30034	0.000515702	0.69856	0.000961437	0.035334	0.950309	0.103582
1190002N15Rik	NM_001033145	68861	RIKEN cDNA 1190002N15 gene	9.7227	5.68049	-4.04221	0.00042347	0.0147719	0.0578251	0.0335917	0.386911	0.221425
Pappa	NM_021362	18491	pregnancy-associated plasma protein A	-9.20654	-5.87029	3.33624	0.00111331	0.015842	0.126757	0.0475063	0.386911	0.33018
BC031181	NM_001001181	407819	cDNA sequence BC031181	-8.5092	-1.64001	6.86919	0.00129415	0.399586	0.00536537	0.0494279	0.808225	0.11111
Lnp	NM_027133	69605	limb and neural patterns	-7.88485	2.21453	10.0994	0.00419421	0.287742	0.000734551	0.0736205	0.719046	0.103582
Alkbh5	NM_172943	268420	alkB, alkylation repair homolog 5 (E. coli)	-7.00776	-1.11617	5.89159	0.00674483	0.57792	0.0165885	0.0868499	0.898625	0.138141
Npr1	NM_008727	18160	natriuretic peptide receptor 1	15.2014	10.3697	-4.83165	8.25751e-05	0.00265126	0.0473353	0.0159662	0.383054	0.203952
Wdr13	NR_029428	73447	WD repeat domain 13	-7.25308	-3.05375	4.19933	0.00263758	0.122636	0.0451105	0.0625272	0.543286	0.199819
Pick1	NM_008837	18693	protein interacting with C kinase 1	8.98131	3.47085	-5.51046	0.00245977	0.135868	0.0297388	0.061286	0.563059	0.16682
Plxna4	NM_175750	243743	plexin A4	-8.88633	-1.31455	7.57178	0.000868454	0.491921	0.0027572	0.0435064	0.853367	0.10513
Dbndd1	NM_028146	72185	dysbindin (dystrobrevin binding protein 1) domain containing 1	-15.429	-5.30761	10.1214	6.14294e-05	0.0309652	0.00305601	0.0134462	0.394148	0.10513
Ap1ar	NM_145964	211556	adaptor-related protein complex 1 associated regulatory protein	-13.8733	0.352154	14.2255	0.000169593	0.862301	0.00013044	0.0238013	0.987185	0.0691781
Dhcr24	NM_053272	74754	24-dehydrocholesterol reductase	-15.2375	-3.66046	11.577	4.22946e-05	0.0958911	0.000743669	0.0112153	0.508261	0.103582
Mecom	NM_021442	14013	MDS1 and EVI1 complex locus	9.9268	6.50644	-3.42036	0.00115458	0.0144725	0.13194	0.0481108	0.386911	0.33733
Ang	NM_007447	11727	angiogenin, ribonuclease, RNase A family, 5	10.6325	9.01534	-1.61713	0.000456649	0.00163117	0.426829	0.0337849	0.383054	0.642917
Hpgd	NM_008278	15446	hydroxyprostaglandin dehydrogenase 15 (NAD)	6.89714	3.74585	-3.15129	0.00925074	0.101569	0.155867	0.0996058	0.512175	0.365812
Vps37b	NM_177876	330192	vacuolar protein sorting 37B (yeast)	-14.922	-2.24777	12.6743	3.41675e-05	0.263314	0.000219584	0.0100669	0.700311	0.0781745
Gm4951	NM_001033767	240327	predicted gene 4951	-8.48595	-0.422733	8.06322	0.00134078	0.823582	0.00193538	0.0497547	0.979454	0.10513
Rttn	NM_175542	246102	rotatin	-8.22661	-2.47591	5.7507	0.00197597	0.225081	0.0158644	0.0566891	0.664611	0.135808
Accs	NM_183220	329470	1-aminocyclopropane-1-carboxylate synthase homolog (Arabidopsis)(non-functional)	7.66978	1.69518	-5.9746	0.00647776	0.434761	0.0218773	0.0852163	0.836053	0.151217
Pcp2	NM_008790	18545	Purkinje cell protein 2 (L7)	12.3168	3.80606	-8.51075	0.000167077	0.118353	0.00227343	0.0236739	0.536351	0.10513
Slfn4	NM_011410	20558	schlafen 4	-15.0153	-2.75271	12.2626	2.63051e-05	0.174276	0.00027059	0.00827585	0.615833	0.085883
Krtcap3	NM_027221	69815	keratinocyte associated protein 3	12.3131	-3.22029	-15.5334	0.000373914	0.197678	4.112e-05	0.0328516	0.646479	0.0381635
Lrrtm4	NR_027323	243499	leucine rich repeat transmembrane neuronal 4	-15.3381	-4.7775	10.5606	6.41725e-05	0.0460466	0.00217748	0.0136916	0.422516	0.10513
Kbtbd4	NM_025991	67136	kelch repeat and BTB (POZ) domain containing 4	-14.0949	-0.0413545	14.0536	0.0001145	0.98345	0.000118179	0.0193214	1	0.066951
Lrfn5	NM_178714	238205	leucine rich repeat and fibronectin type III domain containing 5	15.5265	8.43005	-7.09649	7.33196e-05	0.0113046	0.00931842	0.0143259	0.383054	0.11937
F7	NM_010172	14068	coagulation factor VII	14.9816	13.1358	-1.84581	0.000141093	0.000492122	0.40158	0.0220081	0.383054	0.618076
Sall3	NM_178280	20689	sal-like 3 (Drosophila)	-7.3912	-4.25215	3.13905	0.00476948	0.0594185	0.145726	0.0769836	0.439419	0.35419
Aytl1b	NA	NA	NA	-15.3414	-15.3414	0	0.000153467	6.43035e-05	1	0.0227977	0.23872	1
Dck	NM_007832	13178	deoxycytidine kinase	-7.5577	2.37925	9.93695	0.00586141	0.264694	0.000955188	0.082549	0.700311	0.103582
Angel2	NR_037579	52477	angel homolog 2 (Drosophila)	-13.8087	0.199569	14.0083	0.000133661	0.919897	0.000114429	0.0213405	0.998425	0.066951
Chid1	NM_026522	68038	chitinase domain containing 1	6.31322	2.92368	-3.38953	0.00684714	0.142834	0.0951607	0.0871747	0.572261	0.285451
Spata2	NM_170756	263876	spermatogenesis associated 2	-15.1068	-4.58964	10.5172	5.67404e-05	0.0485258	0.00191254	0.013023	0.423787	0.10513
Fcgrt	NM_010189	14132	Fc receptor, IgG, alpha chain transporter	-15.0349	-2.53425	12.5007	0.000153524	0.263622	0.000842501	0.0227977	0.700311	0.103582
Ppard	NM_011145	19015	peroxisome proliferator activator receptor delta	-13.7502	0.138607	13.8888	0.000176765	0.945299	0.000159254	0.0239498	1	0.0763097
Fam105a	NM_198301	223433	family with sequence similarity 105, member A	-8.13034	3.11887	11.2492	0.00480763	0.158626	0.000462984	0.0771386	0.594563	0.103582
Dpy19l2	NM_001166207	320752	dpy-19-like 2 (C. elegans)	-15.2796	-11.0911	4.18842	0.00020279	0.00111501	0.202402	0.025747	0.383054	0.424615
Htr2b	NM_008311	15559	5-hydroxytryptamine (serotonin) receptor 2B	-9.0327	1.07696	10.1097	0.00254903	0.608405	0.00116819	0.062012	0.910916	0.103582
Psme3	NM_011192	19192	proteaseome (prosome, macropain) 28 subunit, 3	-8.20399	-1.70219	6.5018	0.00259166	0.402977	0.0101729	0.0621254	0.81208	0.121982
Npnt	NM_033525	114249	nephronectin	6.96156	2.04516	-4.9164	0.00506391	0.305599	0.0290963	0.0782262	0.737076	0.165467
Gc	NM_008096	14473	group specific component	15.4039	8.84007	-6.56383	6.57692e-05	0.00780294	0.0125284	0.0137169	0.383054	0.128399
Dub1a	NM_201409	381944	deubiquitinating enzyme 1a	15.405	0	-15.405	6.69621e-05	1	2.71474e-05	0.0138106	1	0.0296418
Zfp474	NM_025749	66758	zinc finger protein 474	3.20037	-11.6277	-14.828	0.192434	0.00103939	0.000148854	0.466556	0.383054	0.0746765
Wdr64	NM_029453	75820	WD repeat domain 64	11.6852	8.0521	-3.63312	0.000951689	0.00965225	0.141069	0.0437937	0.383054	0.348998
Nf2	NM_010898	18016	neurofibromatosis 2	-12.3291	2.04215	14.3712	0.000522214	0.331115	0.000112517	0.035334	0.750015	0.066951
Twistnb	NM_172253	28071	TWIST neighbor	8.75214	5.14459	-3.60755	0.00112257	0.0250386	0.0881156	0.0475691	0.391547	0.274604
Tmem9b	NM_020050	56786	TMEM9 domain family, member B	-6.50677	-2.0247	4.48206	0.0068368	0.301815	0.040545	0.0871747	0.732229	0.190676
Camk4	NM_009793	12326	calcium/calmodulin-dependent protein kinase IV	-15.1311	-3.95688	11.1742	4.22155e-05	0.0742445	0.000970459	0.0112153	0.466056	0.103582
Cdc45l	NA	NA	NA	14.9641	9.47121	-5.49288	0.000213497	0.00738266	0.0393465	0.026395	0.383054	0.188068
Fancm	NM_178912	104806	Fanconi anemia, complementation group M	-11.5825	-2.46029	9.12224	0.000189459	0.230367	0.00141478	0.0246815	0.665019	0.103582
Acot7	NM_133348	70025	acyl-CoA thioesterase 7	-6.86773	-1.83983	5.0279	0.00855715	0.376879	0.0360566	0.0955983	0.787435	0.181328
Alpk2	NM_001037294	225638	alpha-kinase 2	9.21262	4.1182	-5.09442	0.00324109	0.100426	0.0497727	0.0682139	0.510716	0.208025
Pion	NM_175437	212167	pigeon homolog (Drosophila)	6.92993	6.74019	-0.189747	0.00606556	0.00710663	0.922163	0.0833073	0.383054	0.983408
Foxn2	NM_180974	14236	forkhead box N2	-7.32475	-0.917873	6.40688	0.00564092	0.649043	0.0116624	0.0815234	0.930447	0.126479
Ankrd43	NA	NA	NA	5.82567	-9.09636	-14.922	0.0432599	0.00635143	0.000227262	0.209658	0.383054	0.0781745
Batf	NM_016767	53314	basic leucine zipper transcription factor, ATF-like	15.2981	11.0708	-4.22732	6.5753e-05	0.00144865	0.070965	0.0137169	0.383054	0.24517
Lrit1	NM_146245	239037	leucine-rich repeat, immunoglobulin-like and transmembrane domains 1	-15.1842	-7.78553	7.39871	0.000334783	0.0117585	0.0350189	0.0315444	0.383054	0.179027
Mmp12	NM_008605	17381	matrix metallopeptidase 12	9.086	14.5551	5.46911	0.00910715	0.000251287	0.0385473	0.0985219	0.383054	0.186235
Mrps2	NM_080452	118451	mitochondrial ribosomal protein S2	-15.0707	-3.46503	11.6056	4.38216e-05	0.109537	0.000683188	0.0114566	0.523983	0.103582
Cdkn2aipnl	NM_029976	52626	CDKN2A interacting protein N-terminal like	-13.5522	0.415762	13.968	0.000223857	0.838316	0.000164443	0.0270737	0.982024	0.0763097
D930020E02Rik	NA	NA	NA	-15.0195	-3.02992	11.9896	0.000174387	0.1944	0.00129417	0.0238013	0.641106	0.103582
E430016F16Rik	NR_015542	414121	RIKEN cDNA E430016F16 gene	8.15915	2.73056	-5.4286	0.00240106	0.195414	0.0219851	0.0606937	0.643013	0.151367
Igfbp3	NM_008343	16009	insulin-like growth factor binding protein 3	-14.6516	-1.83643	12.8151	5.47916e-05	0.361912	0.000239041	0.0128739	0.778793	0.080674
Serpina3h	NR_033450	546546	serine (or cysteine) peptidase inhibitor, clade A, member 3H	7.11551	2.43463	-4.68088	0.00891094	0.268703	0.0534996	0.0972969	0.700669	0.213533
Terf2ip	NM_020584	57321	telomeric repeat binding factor 2, interacting protein	14.5219	12.7239	-1.798	0.000214721	0.000712795	0.417185	0.026395	0.383054	0.632921
Myo3b	NM_177376	329421	myosin IIIB	6.68856	0.588099	-6.10046	0.00742041	0.764452	0.0120055	0.0898484	0.965803	0.127154
Rps6ka4	NM_019924	56613	ribosomal protein S6 kinase, polypeptide 4	-14.9898	-3.18983	11.8	5.6829e-05	0.140966	0.000669018	0.013023	0.570882	0.103582
Krt5	NM_027011	110308	keratin 5	9.67242	-3.51443	-13.1869	0.00200651	0.156018	0.000198268	0.0571488	0.588739	0.0770705
Zfp553	NM_146201	233887	zinc finger protein 553	-7.45695	-4.44979	3.00716	0.00550931	0.0563247	0.170057	0.0809084	0.43663	0.383514
1700094D03Rik	NM_028567	73545	RIKEN cDNA 1700094D03 gene	-14.838	-2.69391	12.144	0.000161645	0.234866	0.0010111	0.0233777	0.672153	0.103582
Fcgbp	NM_001122603	215384	Fc fragment of IgG binding protein	15.1177	11.5537	-3.56401	5.06546e-05	0.000783962	0.106838	0.0126192	0.383054	0.30239
Col20a1	NM_028518	73368	collagen, type XX, alpha 1	14.7814	11.2197	-3.56168	0.000216358	0.00220755	0.139782	0.0264213	0.383054	0.347202
Nat15	NM_029090	74763	N-acetyltransferase 15 (GCN5-related, putative)	-10.5999	-0.0793168	10.5206	0.00061824	0.968463	0.000656989	0.0378738	1	0.103582
Stxbp4	NM_011505	20913	syntaxin binding protein 4	-14.6995	-2.36791	12.3316	6.19899e-05	0.253756	0.000399085	0.0134462	0.691155	0.103582
Pqlc1	NM_025861	66943	PQ loop repeat containing 1	-4.22755	10.1372	14.3647	0.199334	0.00135563	0.000199299	0.475083	0.383054	0.0770705
Ercc2	NM_007949	13871	excision repair cross-complementing rodent repair deficiency, complementation group 2	-14.7726	-3.37725	11.3953	0.000111182	0.13581	0.00128032	0.0191797	0.563048	0.103582
Olfr533	NM_001011815	258056	olfactory receptor 533	14.8379	0	-14.8379	0.000257388	1	0.000116863	0.0296748	1	0.066951
AI118078	NM_172923	244886	expressed sequence AI118078	-10.0883	-6.09556	3.99271	0.00202736	0.0263828	0.114688	0.0574382	0.392646	0.312697
Cxcl13	NM_018866	55985	chemokine (C-X-C motif) ligand 13	15.1246	5.78898	-9.33557	3.55635e-05	0.0612442	0.000883451	0.0103145	0.441701	0.103582
Trim21	NM_009277	20821	tripartite motif-containing 21	-7.42764	-2.06268	5.36496	0.00557557	0.325431	0.0279019	0.0812834	0.750015	0.163429
Slc30a1	NM_009579	22782	solute carrier family 30 (zinc transporter), member 1	-13.3485	0.488799	13.8373	0.000498353	0.820687	0.000359636	0.0350395	0.979226	0.102701
Rabl3	NM_001042499	67657	RAB, member of RAS oncogene family-like 3	-7.79273	-1.59961	6.19312	0.00429036	0.439651	0.0148553	0.0740815	0.836053	0.134101
Slc25a10	NM_013770	27376	solute carrier family 25 (mitochondrial carrier, dicarboxylate transporter), member 10	9.68682	6.30795	-3.37887	0.000744421	0.0116709	0.116312	0.0405218	0.383054	0.315082
Cav1	NM_007616	12389	caveolin 1, caveolae protein	-8.47777	1.56238	10.0402	0.00357608	0.459329	0.00113215	0.0698729	0.840585	0.103582
Cenpj	NM_001014996	219103	centromere protein J	-8.44379	-2.19766	6.24614	0.00265466	0.298316	0.0145191	0.0626806	0.72805	0.133418
Hn1	NM_008258	15374	hematological and neurological expressed sequence 1	-10.9945	-1.93934	9.05512	0.000539681	0.35656	0.00232831	0.0355233	0.773457	0.10513
Fcgr4	NM_144559	246256	Fc receptor, IgG, low affinity IV	-10.9969	-0.901473	10.0954	0.000441241	0.654899	0.000885705	0.0337218	0.933378	0.103582
Suv39h1	NM_011514	20937	suppressor of variegation 3-9 homolog 1 (Drosophila)	14.5553	12.1632	-2.39212	0.000385317	0.00165149	0.314464	0.0328516	0.383054	0.539506
Mrp63	NM_026401	67840	mitochondrial ribosomal protein 63	-15.0364	-5.01424	10.0221	0.000111594	0.0432088	0.00386289	0.0191797	0.415152	0.106221
Mobkl1a	NA	NA	NA	-8.62223	-0.176835	8.4454	0.00329341	0.932206	0.00374611	0.0685848	1	0.106093
Nrf1	NM_010938	18181	nuclear respiratory factor 1	-10.6419	-2.61974	8.02213	0.000385824	0.208065	0.00321437	0.0328516	0.659764	0.105166
Ugt3a2	NM_144845	223337	UDP glycosyltransferases 3 family, polypeptide A2	11.0784	-1.76614	-12.8446	0.000893399	0.470787	0.000272982	0.0435941	0.847252	0.085883
Tcfap2c	NA	NA	NA	14.7601	8.25743	-6.50262	0.000363852	0.01903	0.024416	0.0326272	0.386911	0.155695
Gm12250	NM_001135115	631323	predicted gene 12250	-14.5505	-1.9514	12.5991	7.21259e-05	0.340901	0.000332121	0.0142426	0.759775	0.0963253
Crispld1	NM_031402	83691	cysteine-rich secretory protein LCCL domain containing 1	-15.0223	-7.94562	7.07665	0.000147922	0.00606538	0.0335161	0.022506	0.383054	0.176207
Ubqln2	NM_018798	54609	ubiquilin 2	-10.7277	-0.553009	10.1747	0.000609093	0.784904	0.00092704	0.0377439	0.969354	0.103582
Nr4a2	NM_013613	18227	nuclear receptor subfamily 4, group A, member 2	-15.0096	-5.84454	9.16507	0.000290281	0.0350693	0.0107953	0.0303645	0.399779	0.123616
Nsg1	NM_010942	18196	neuron specific gene family member 1	7.66929	3.47552	-4.19377	0.00765568	0.142965	0.0859617	0.0911512	0.572561	0.270433
2810002D19Rik	NR_027831	66457	RIKEN cDNA 2810002D19 gene	7.80061	3.12676	-4.67384	0.00322583	0.1452	0.040779	0.068198	0.574552	0.191204
Hsd17b2	NM_008290	15486	hydroxysteroid (17-beta) dehydrogenase 2	14.7476	0	-14.7476	0.000308843	1	0.000142344	0.0308212	1	0.073394
Bicd1	NM_009753	12121	bicaudal D homolog 1 (Drosophila)	-7.30331	-0.0772236	7.22609	0.00752132	0.970168	0.00796515	0.0904256	1	0.116805
Emp3	NM_010129	13732	epithelial membrane protein 3	-6.92445	-1.14823	5.77622	0.00797872	0.572517	0.0197018	0.0928533	0.894835	0.145899
Hyi	NR_003946	68180	hydroxypyruvate isomerase homolog (E. coli)	15.1599	9.23123	-5.9287	0.000179829	0.00845286	0.028763	0.0240143	0.383054	0.164684
Gpr34	NM_011823	23890	G protein-coupled receptor 34	7.5616	4.16981	-3.39179	0.00450128	0.0672224	0.120977	0.0746674	0.4526	0.321819
A730011L01Rik	NM_177394	338371	RIKEN cDNA A730011L01 gene	-11.5554	-2.72062	8.83478	0.000718556	0.23597	0.00451561	0.0400535	0.672662	0.108322
Ptgs2	NM_011198	19225	prostaglandin-endoperoxide synthase 2	-14.8795	-6.19776	8.68173	5.4115e-05	0.0122669	0.00727415	0.0128739	0.383054	0.114605
Rfwd2	NM_011931	26374	ring finger and WD repeat domain 2	-7.9304	-0.474596	7.45581	0.00481685	0.818769	0.00684767	0.0771386	0.978711	0.113575
Orai1	NM_175423	109305	ORAI calcium release-activated calcium modulator 1	9.28687	10.5126	1.22576	0.00556739	0.00265392	0.597718	0.0812834	0.383054	0.777667
Med17	NM_144933	234959	mediator complex subunit 17	-14.6306	-2.42154	12.2091	7.19923e-05	0.247238	0.000472433	0.0142426	0.682414	0.103582
Ate1	NM_013799	11907	arginyltransferase 1	-6.88705	-1.70038	5.18667	0.00759533	0.405195	0.0297255	0.0908405	0.814515	0.16682
Mrpl9	NM_030116	78523	mitochondrial ribosomal protein L9	-9.33928	-3.72031	5.61897	0.00167171	0.103833	0.0273483	0.0528488	0.516298	0.162548
Stam	NM_011484	20844	signal transducing adaptor molecule (SH3 domain and ITAM motif) 1	-8.52011	-0.158188	8.36192	0.00483831	0.941434	0.00539058	0.0771552	1	0.11111
Gstm7	NM_026672	68312	glutathione S-transferase, mu 7	-7.10747	-1.04915	6.05832	0.00674741	0.60352	0.0155138	0.0868499	0.909467	0.135459
Cisd2	NM_025902	67006	CDGSH iron sulfur domain 2	-8.52825	-3.23049	5.29776	0.00277482	0.147211	0.0322277	0.063208	0.575875	0.172594
Mrps17	NM_025450	66258	mitochondrial ribosomal protein S17	-14.6272	-2.38979	12.2374	9.93234e-05	0.263629	0.000588163	0.0178994	0.700311	0.103582
Nkain2	NM_001025286	432450	Na+/K+ transporting ATPase interacting 2	-7.76335	-0.548445	7.21491	0.00659961	0.796107	0.00974712	0.0857858	0.971917	0.120021
Polr3a	NM_001081247	218832	polymerase (RNA) III (DNA directed) polypeptide A	-9.57304	-2.87642	6.69662	0.000925779	0.175349	0.00928183	0.0436537	0.617263	0.119231
Tpbg	NM_011627	21983	trophoblast glycoprotein	8.81069	3.85077	-4.95992	0.00665328	0.139731	0.0684261	0.0862683	0.56817	0.240889
Trpm6	NM_153417	225997	transient receptor potential cation channel, subfamily M, member 6	7.7802	4.64526	-3.13494	0.00614535	0.0593304	0.169797	0.0836045	0.439419	0.383473
Rsad1	NM_001013381	237926	radical S-adenosyl methionine domain containing 1	-14.284	-1.33435	12.9496	0.000181252	0.529471	0.000465636	0.0240314	0.874209	0.103582
Olfr614	NA	NA	NA	15.0523	9.94833	-5.10392	0.000326332	0.00694785	0.0605299	0.0312812	0.383054	0.226889
Klk1b24	NM_010643	16617	kallikrein 1-related peptidase b24	15.0911	0	-15.0911	0.000173348	1	7.65927e-05	0.0238013	1	0.0646234
Acot11	NM_025590	329910	acyl-CoA thioesterase 11	8.7113	5.66679	-3.0445	0.00290951	0.0272229	0.175896	0.0646462	0.392646	0.391484
Hcfc2	NM_001081218	67933	host cell factor C2	-8.54597	-3.86288	4.68308	0.00243418	0.0883756	0.0487688	0.0612239	0.49679	0.206489
2310061I04Rik	NM_001033630	69662	RIKEN cDNA 2310061I04 gene	14.5951	10.4642	-4.13095	0.000484346	0.00547215	0.115406	0.0343949	0.383054	0.313918
Rab11fip5	NM_177466	52055	RAB11 family interacting protein 5 (class I)	10.0617	7.69686	-2.36482	0.0026183	0.0117192	0.315323	0.0623674	0.383054	0.539711
Tecta	NM_009347	21683	tectorin alpha	14.6469	9.38568	-5.26118	0.000378376	0.0093557	0.0529523	0.0328516	0.383054	0.212795
Dennd5b	NM_177192	320560	DENN/MADD domain containing 5B	-11.1968	-2.15512	9.04167	0.000475442	0.310616	0.00238993	0.0339429	0.74023	0.10513
6530402F18Rik	NR_029460	76220	RIKEN cDNA 6530402F18 gene	-14.8892	-6.92008	7.96911	0.000294451	0.0170421	0.0223863	0.0303645	0.386911	0.152127
Ccdc48	NM_001159697	58229	coiled-coil domain containing 48	-14.8812	-5.35175	9.52942	0.000302246	0.0474854	0.00842692	0.0307338	0.423217	0.117698
Abca17	NM_001031621	381072	ATP-binding cassette, sub-family A (ABC1), member 17	-14.8626	-4.69789	10.1647	0.000314104	0.0732645	0.00573262	0.0309208	0.462485	0.111349
Mynn	NM_030557	80732	myoneurin	-9.9195	0.533136	10.4526	0.00148466	0.797679	0.00100857	0.051004	0.972355	0.103582
P4ha3	NM_177161	320452	procollagen-proline, 2-oxoglutarate 4-dioxygenase (proline 4-hydroxylase), alpha polypeptide III	9.91257	7.97948	-1.93309	0.0024813	0.00874298	0.397278	0.0614926	0.383054	0.613485
Slc28a1	NM_001004184	434203	solute carrier family 28 (sodium-coupled nucleoside transporter), member 1	14.6032	8.46922	-6.13401	0.00027104	0.014277	0.0257119	0.0297351	0.386911	0.158351
Bag3	NM_013863	29810	BCL2-associated athanogene 3	-8.53179	-3.68993	4.84186	0.00295088	0.106142	0.0477007	0.0649867	0.518555	0.204344
Rbm41	NM_153586	237073	RNA binding motif protein 41	-11.0383	-1.59025	9.44803	0.000614109	0.451244	0.00196919	0.0377453	0.836053	0.10513
Lrrc18	NM_026253	67580	leucine rich repeat containing 18	15.0247	8.76864	-6.25604	0.000122599	0.0094697	0.0185797	0.0201388	0.383054	0.143609
Aaas	NM_153416	223921	achalasia, adrenocortical insufficiency, alacrimia	-8.08622	-2.80017	5.28605	0.00802323	0.239866	0.0498012	0.0930213	0.678924	0.208025
Uspl1	NM_001115153	231915	ubiquitin specific peptidase like 1	-8.74347	-0.437603	8.30587	0.00273288	0.831801	0.00378372	0.0630303	0.981117	0.106093
Gna14	NM_008137	14675	guanine nucleotide binding protein, alpha 14	-14.8482	-5.24142	9.60673	0.000293868	0.0501097	0.00783698	0.0303645	0.424108	0.115791
Tnrc4	NA	NA	NA	-14.4616	-2.618	11.8436	0.000452572	0.277505	0.00219919	0.0337375	0.710556	0.10513
Lmo7	NM_201529	380928	LIM domain only 7	-11.4229	-5.38315	6.0398	0.000475055	0.0306845	0.0251021	0.0339429	0.393529	0.156884
Slc44a3	NM_145394	213603	solute carrier family 44, member 3	11.7714	5.11157	-6.6598	0.000472743	0.0535013	0.0135756	0.0339429	0.427993	0.130227
E130308A19Rik	NM_153158	230259	RIKEN cDNA E130308A19 gene	-8.2635	-0.162169	8.10133	0.00436482	0.938317	0.0049047	0.0743007	1	0.109569
Sf3b4	NM_153053	107701	splicing factor 3b, subunit 4	-11.1263	-3.79863	7.32766	0.000450544	0.0924317	0.00829917	0.0337218	0.501703	0.117345
Zfp689	NM_175163	71131	zinc finger protein 689	10.6382	5.87695	-4.76127	0.000672742	0.0239394	0.0471103	0.0388838	0.386911	0.203952
Tbrg3	NR_027799	21378	transforming growth factor beta regulated gene 3	-13.2137	0.204443	13.4182	0.000523481	0.924044	0.000456101	0.035334	0.999221	0.103582
Iigp	NA	NA	NA	9.78889	4.49741	-5.29148	0.00139398	0.0669707	0.0343295	0.0500208	0.451842	0.177648
Tmem41a	NR_037773	66664	transmembrane protein 41a	-14.6249	-4.54699	10.0779	0.000101274	0.0537619	0.00301413	0.0179968	0.428847	0.10513
Irg1	NM_008392	16365	immunoresponsive gene 1	-9.39281	-0.0296774	9.36313	0.00190955	0.988576	0.00195081	0.0556238	1	0.10513
Mphosph9	NM_001081323	269702	M-phase phosphoprotein 9	-11.0026	-2.47487	8.52775	0.000630933	0.254962	0.00390365	0.0383979	0.692655	0.106387
Pde5a	NM_153422	242202	phosphodiesterase 5A, cGMP-specific	14.5382	10.2781	-4.2601	0.000314838	0.00466427	0.0931538	0.0309208	0.383054	0.282893
Csnk1e	NM_013767	27373	casein kinase 1, epsilon	-9.20134	-1.1566	8.04474	0.00210142	0.581743	0.00490321	0.0578918	0.900795	0.109569
Acot12	NM_028790	74156	acyl-CoA thioesterase 12	14.9728	8.00731	-6.96549	0.000326935	0.0223562	0.0184453	0.0312812	0.386911	0.143353
Hist3h2a	NM_178218	319162	histone cluster 3, H2a	-8.88488	-0.847212	8.03767	0.00415097	0.700013	0.00730001	0.0736205	0.950309	0.114605
Fhdc1	NM_001205355	229474	FH2 domain containing 1	10.4146	5.89183	-4.52272	0.00217448	0.0380448	0.0823723	0.0585732	0.408979	0.264264
Arid3a	NM_007880	13496	AT rich interactive domain 3A (BRIGHT-like)	10.7254	9.4201	-1.30533	0.00141012	0.00334257	0.555635	0.0500208	0.383054	0.745223
Cpn1	NM_030703	93721	carboxypeptidase N, polypeptide 1	14.529	8.68737	-5.84166	0.000235101	0.0114297	0.0287633	0.0277959	0.383054	0.164684
Gm347	NA	NA	NA	11.7311	5.718	-6.0131	0.000783323	0.0415103	0.0273286	0.0413069	0.411871	0.162548
Irak4	NM_029926	266632	interleukin-1 receptor-associated kinase 4	-9.3402	-3.5434	5.7968	0.00167658	0.119304	0.0236881	0.0528488	0.538678	0.154868
Gpr35	NM_022320	64095	G protein-coupled receptor 35	-8.07505	1.66613	9.74118	0.00600186	0.44375	0.00186228	0.0831568	0.836053	0.10513
Slc29a2	NM_007854	13340	solute carrier family 29 (nucleoside transporters), member 2	-14.7067	-6.18337	8.52329	0.000113998	0.0166297	0.0104073	0.0193214	0.386911	0.122343
Mfsd8	NM_028140	72175	major facilitator superfamily domain containing 8	-8.61621	-1.29878	7.31744	0.00469276	0.556437	0.0112785	0.0762758	0.88848	0.12484
Xylt2	NM_145828	217119	xylosyltransferase II	-9.32739	-3.52894	5.79844	0.0017144	0.121039	0.0238273	0.0529496	0.540904	0.154868
Megf8	NM_001160400	269878	multiple EGF-like-domains 8	-9.20818	0.00856083	9.21674	0.00330324	0.996845	0.00328359	0.0685848	1	0.105166
D730001G18Rik	NR_027837	78725	RIKEN cDNA D730001G18 gene	14.7045	11.4622	-3.24228	0.000350527	0.00253158	0.188024	0.0322881	0.383054	0.407008
Abhd14a	NM_145919	68644	abhydrolase domain containing 14A	-11.4543	-3.60095	7.85332	0.000753164	0.130585	0.00873369	0.0405365	0.556783	0.118263
Spon1	NM_145584	233744	spondin 1, (f-spondin) extracellular matrix protein	-12.8878	0.73548	13.6233	0.000873253	0.740057	0.000546139	0.0435064	0.960642	0.103582
Mpp5	NM_019579	56217	membrane protein, palmitoylated 5 (MAGUK p55 subfamily member 5)	-9.46808	0.461602	9.92968	0.00280999	0.829607	0.00204699	0.063586	0.980557	0.10513
Rassf6	NM_028478	73246	Ras association (RalGDS/AF-6) domain family member 6	14.4681	2.10096	-12.3671	0.0004197	0.474214	0.000685215	0.0334355	0.848767	0.103582
0610010F05Rik	NM_027860	71675	RIKEN cDNA 0610010F05 gene	-7.66258	-1.30787	6.35471	0.00842921	0.552425	0.0206389	0.0950381	0.886292	0.147573
Ralgps1	NM_175211	241308	Ral GEF with PH domain and SH3 binding motif 1	-8.9497	-1.54874	7.40096	0.00193202	0.454442	0.0063469	0.0559471	0.836923	0.112886
Ppp1r3b	NM_177741	244416	protein phosphatase 1, regulatory (inhibitor) subunit 3B	-14.3502	-2.2569	12.0933	0.000151795	0.296624	0.000774578	0.0227977	0.727094	0.103582
Gmps	NM_001033300	229363	guanine monophosphate synthetase	-7.1926	0.506025	7.69863	0.00847862	0.807286	0.00582457	0.095229	0.975374	0.111349
Ms4a6b	NM_027209	69774	membrane-spanning 4-domains, subfamily A, member 6B	-7.80665	0.30617	8.11282	0.00722469	0.886398	0.00584084	0.0889085	0.993318	0.111349
Cubn	NM_001081084	65969	cubilin (intrinsic factor-cobalamin receptor)	8.58915	4.54444	-4.04471	0.00285383	0.0592944	0.082509	0.0641316	0.439419	0.264587
Insig1	NM_153526	231070	insulin induced gene 1	-10.0036	-3.70156	6.30205	0.00110386	0.105095	0.017658	0.0473206	0.517536	0.140793
Cldn12	NM_022890	64945	claudin 12	-8.98032	0.451392	9.43171	0.00336411	0.832712	0.0024606	0.0691524	0.981117	0.10513
1810030N24Rik	NM_025471	66291	RIKEN cDNA 1810030N24 gene	-8.04211	-4.41285	3.62926	0.00504758	0.0682256	0.122386	0.0782262	0.454131	0.323609
Tfam	NM_009360	21780	transcription factor A, mitochondrial	13.7889	12.961	-0.827962	0.000233615	0.000421161	0.692495	0.0277959	0.383054	0.845998
2310046O06Rik	NM_175273	78323	RIKEN cDNA 2310046O06 gene	-14.0151	-1.52328	12.4918	0.000561724	0.509692	0.00142007	0.0363096	0.862021	0.103582
Sh2d4a	NM_028182	72281	SH2 domain containing 4A	-14.5053	-9.80907	4.69624	0.0004867	0.00339677	0.160053	0.0343949	0.383054	0.370669
Gpr173	NM_027543	70771	G-protein coupled receptor 173	8.90667	8.24066	-0.66601	0.00875706	0.0127483	0.781546	0.0968127	0.383054	0.903767
Crtap	NM_019922	56693	cartilage associated protein	-14.594	-3.40611	11.1879	0.000163763	0.140636	0.00176513	0.0233829	0.570348	0.10513
Gm5069	NR_003623	277333	glyceraldehyde-3-phosphate dehydrogenase pseudogene	8.88206	5.37588	-3.50619	0.00275476	0.0351683	0.129051	0.0632068	0.399779	0.333341
Mocos	NM_026779	68591	molybdenum cofactor sulfurase	-12.8804	0.548239	13.4286	0.000676281	0.799312	0.000468352	0.0388838	0.97255	0.103582
Ddit3	NM_007837	13198	DNA-damage inducible transcript 3	-14.0409	-1.28574	12.7551	0.000250783	0.549055	0.000610124	0.0290939	0.884633	0.103582
Piga	NM_011081	18700	phosphatidylinositol glycan anchor biosynthesis, class A	-13.9302	-1.26067	12.6696	0.000298456	0.559818	0.000704566	0.0306074	0.8899	0.103582
Rnf145	NM_028862	74315	ring finger protein 145	-9.73563	0.546746	10.2824	0.00204955	0.796492	0.0013973	0.0575548	0.971917	0.103582
Satb2	NM_139146	212712	special AT-rich sequence binding protein 2	14.8377	6.50375	-8.33398	0.000178566	0.0478844	0.00502564	0.0240143	0.423217	0.109949
Aplnr	NM_011784	23796	apelin receptor	14.3537	10.9082	-3.44551	0.000534934	0.00409207	0.173603	0.0355233	0.383054	0.387954
Negr1	NM_177274	320840	neuronal growth regulator 1	-8.56734	0.878607	9.44595	0.00465574	0.68399	0.00254392	0.0759402	0.94501	0.10513
Mier3	NM_172593	218613	mesoderm induction early response 1, family member 3	-14.1988	-2.226	11.9728	0.000203901	0.309777	0.000975112	0.025747	0.739518	0.103582
BC031781	NM_145943	208768	cDNA sequence BC031781	-12.7605	0.723546	13.484	0.000658958	0.73519	0.000401972	0.0388378	0.958979	0.103582
Rrn3	NM_001039521	106298	RRN3 RNA polymerase I transcription factor homolog (yeast)	-10.9042	-1.83622	9.06799	0.000726461	0.390785	0.00275461	0.0402525	0.801341	0.10513
Zfp661	NM_028141	72180	zinc finger protein 661	11.5945	5.84882	-5.7457	0.000694161	0.0350068	0.0296923	0.0394037	0.399779	0.16682
Ddn	NM_001013741	13199	dendrin	-14.6381	-5.44744	9.19062	0.000556355	0.0537116	0.0129712	0.0361086	0.42863	0.129033
Ripk1	NM_009068	19766	receptor (TNFRSF)-interacting serine-threonine kinase 1	-12.846	0.580814	13.4268	0.000742364	0.789137	0.000505491	0.0405218	0.970299	0.103582
Alg12	NM_145477	223774	asparagine-linked glycosylation 12 homolog (yeast, alpha-1,6-mannosyltransferase)	-8.7174	-1.14139	7.57601	0.00483622	0.607263	0.0103065	0.0771552	0.910645	0.122092
3830406C13Rik	NM_178141	218734	RIKEN cDNA 3830406C13 gene	-13.9556	-1.48334	12.4723	0.000238422	0.487719	0.000677377	0.02801	0.850195	0.103582
Plcb2	NM_177568	18796	phospholipase C, beta 2	-10.8975	2.94685	13.8444	0.00338882	0.219057	0.000530044	0.0692005	0.664611	0.103582
Asgr2	NM_007493	11890	asialoglycoprotein receptor 2	14.5069	7.2383	-7.26857	0.000289698	0.0318325	0.0121404	0.0303645	0.396836	0.127154
Ano8	NM_001164679	382014	anoctamin 8	14.3766	8.18539	-6.19122	0.000391003	0.0187108	0.0275513	0.0329348	0.386911	0.162899
Timd2	NM_134249	171284	T-cell immunoglobulin and mucin domain containing 2	14.3768	5.95899	-8.41782	0.000471892	0.0765826	0.00755066	0.0339429	0.470608	0.11461
Zfp202	NM_030713	80902	zinc finger protein 202	-14.4964	-3.66641	10.83	0.000245421	0.126971	0.00280812	0.028651	0.552203	0.10513
Ercc6l	NM_146235	236930	excision repair cross-complementing rodent repair deficiency complementation group 6 - like	14.1431	11.6613	-2.48188	0.000733326	0.00301837	0.315738	0.0402722	0.383054	0.539711
Psmd7	NM_010817	17463	proteasome (prosome, macropain) 26S subunit, non-ATPase, 7	-13.259	0.0254155	13.2844	0.000444068	0.990425	0.000436249	0.0337218	1	0.103582
Itga1	NM_001033228	109700	integrin alpha 1	-7.10698	-1.32557	5.78141	0.0088596	0.52863	0.0238229	0.0970008	0.873769	0.154868
Fam179a	NM_177087	320159	family with sequence similarity 179, member A	9.44427	4.25438	-5.18989	0.00390982	0.1061	0.0538648	0.0720696	0.518555	0.213923
Anapc2	NM_175300	99152	anaphase promoting complex subunit 2	-8.65445	-1.99075	6.66369	0.00370314	0.364506	0.0152193	0.0709489	0.78183	0.135032
Reg3b	NM_011036	18489	regenerating islet-derived 3 beta	-14.5941	-12.4878	2.10625	0.000197779	0.000299666	0.475468	0.0253184	0.383054	0.681686
Cmas	NM_009908	12764	cytidine monophospho-N-acetylneuraminic acid synthetase	-14.0063	-1.41767	12.5886	0.00027588	0.512704	0.000727733	0.0297351	0.864143	0.103582
Socs6	NM_018821	54607	suppressor of cytokine signaling 6	-14.1757	-2.34917	11.8265	0.000661176	0.333916	0.00260216	0.0388378	0.753207	0.10513
Myo1c	NM_008659	17913	myosin IC	-12.9421	0.517956	13.46	0.000733274	0.812283	0.00052222	0.0402722	0.97614	0.103582
Pknox1	NR_027493	18771	Pbx/knotted 1 homeobox	-8.56721	-0.148641	8.41857	0.0034351	0.943015	0.00382737	0.0692265	1	0.106221
Ptpn22	NM_008979	19260	protein tyrosine phosphatase, non-receptor type 22 (lymphoid)	8.86986	8.58644	-0.283425	0.00434453	0.00524106	0.896989	0.0743007	0.383054	0.970689
Zfp366	NM_001004149	238803	zinc finger protein 366	14.3374	9.42077	-4.91659	0.00027394	0.00707402	0.0549248	0.0297351	0.383054	0.216182
Ddah2	NM_016765	51793	dimethylarginine dimethylaminohydrolase 2	8.46023	7.19836	-1.26187	0.00712222	0.0157858	0.58196	0.0885143	0.386911	0.76609
BC049807	NA	NA	NA	-10.1949	-2.51678	7.6781	0.0010532	0.250352	0.00665729	0.0462163	0.68733	0.113162
Kbtbd10	NM_001081087	228003	kelch repeat and BTB (POZ) domain containing 10	14.7686	5.56595	-9.20266	0.000369081	0.0955883	0.00462018	0.0328516	0.50735	0.108858
Gripap1	NM_207670	54645	GRIP1 associated protein 1	7.33176	3.77695	-3.55481	0.00592804	0.0952932	0.110293	0.0829836	0.507278	0.306924
Gtf2b	NM_145546	229906	general transcription factor IIB	-13.7539	-1.07319	12.6807	0.000456848	0.627382	0.000916003	0.0337849	0.919354	0.103582
Ninj1	NM_013610	18081	ninjurin 1	-14.0564	-1.53797	12.5185	0.000382197	0.492196	0.00103264	0.0328516	0.853477	0.103582
1110054O05Rik	NM_001013577	66209	RIKEN cDNA 1110054O05 gene	-9.03706	-1.58908	7.44798	0.00274912	0.462534	0.00849186	0.0632068	0.842464	0.117825
Flt3	NM_010229	14255	FMS-like tyrosine kinase 3	14.3189	8.51195	-5.80697	0.000461361	0.016072	0.0374226	0.033849	0.386911	0.183961
Edc4	NM_181594	234699	enhancer of mRNA decapping 4	-13.9958	-1.49853	12.4973	0.000274642	0.489476	0.000767322	0.0297351	0.851059	0.103582
Fadd	NM_010175	14082	Fas (TNFRSF6)-associated via death domain	-11.1049	-2.46938	8.63549	0.00101749	0.27923	0.00534834	0.0458414	0.710556	0.11111
Tmem55a	NM_028264	72519	transmembrane protein 55A	-7.61337	-2.79313	4.82024	0.00537035	0.200214	0.045553	0.0803906	0.647796	0.200763
Ntrk1	NM_001033124	18211	neurotrophic tyrosine kinase, receptor, type 1	-14.5722	-14.5722	0	0.000657689	0.000311793	0.99974	0.0388378	0.383054	1
Lrrc23	NM_013588	16977	leucine rich repeat containing 23	-14.4518	-4.37962	10.0722	0.00045971	0.0936842	0.00653918	0.033849	0.504682	0.112886
Zfp524	NM_025324	66056	zinc finger protein 524	-14.5687	-6.98286	7.58582	0.000506188	0.0197956	0.031813	0.035334	0.386911	0.171511
H2-DMb1	NM_010387	14999	histocompatibility 2, class II, locus Mb1	-9.73417	-3.05531	6.67886	0.0015337	0.176077	0.0140444	0.0513639	0.619004	0.131373
Coro2a	NM_178893	107684	coronin, actin binding protein 2A	-12.859	0.491266	13.3502	0.000652666	0.818844	0.00046814	0.0388378	0.978711	0.103582
Hbegf	NM_010415	15200	heparin-binding EGF-like growth factor	-10.3618	-4.37754	5.98425	0.00140837	0.0763933	0.0285913	0.0500208	0.470008	0.164379
Tgm6	NM_177726	241636	transglutaminase 6	14.7032	7.49939	-7.20383	0.000277135	0.0275356	0.0132311	0.0297351	0.392646	0.129397
Efnb2	NM_010111	13642	ephrin B2	-13.6963	-1.04418	12.6521	0.00038219	0.630098	0.000770883	0.0328516	0.920296	0.103582
Zswim1	NM_028028	71971	zinc finger, SWIM domain containing 1	-14.5262	-8.10935	6.41686	0.000279226	0.00660909	0.0550416	0.0297873	0.383054	0.216366
Gpr153	NM_178406	100129	G protein-coupled receptor 153	-14.2673	-2.53905	11.7283	0.000634977	0.300437	0.00278279	0.0384791	0.730892	0.10513
Pcsk6	NM_011048	18553	proprotein convertase subtilisin/kexin type 6	-12.8972	0.327876	13.2251	0.000673375	0.878998	0.000540598	0.0388838	0.991551	0.103582
Nqo2	NM_020282	18105	NAD(P)H dehydrogenase, quinone 2	-10.3562	-0.667688	9.68849	0.00152865	0.75636	0.00241079	0.0513107	0.96488	0.10513
Wipf3	NM_001167861	330319	WAS/WASL interacting protein family, member 3	-14.2959	-3.45626	10.8396	0.000224617	0.139173	0.00242002	0.0270737	0.567187	0.10513
Eif2b2	NM_145445	217715	eukaryotic translation initiation factor 2B, subunit 2 beta	-14.3437	-3.9169	10.4268	0.000183669	0.0964461	0.00291656	0.0241791	0.508444	0.10513
Spag8	NM_001007463	433700	sperm associated antigen 8	-14.516	-5.35287	9.16318	0.00106674	0.0714703	0.0174348	0.0466172	0.457933	0.140523
Mansc1	NM_026345	67729	MANSC domain containing 1	-9.22535	0.608525	9.83387	0.00716967	0.796387	0.00504317	0.0887223	0.971917	0.110002
Tspan9	NM_175414	109246	tetraspanin 9	-10.6286	-1.51365	9.1149	0.00122616	0.487985	0.00347138	0.0484071	0.850195	0.105471
Mtmr9	NM_177594	210376	myotubularin related protein 9	-7.86229	-1.51107	6.35122	0.00762563	0.49612	0.0213112	0.091027	0.854919	0.149686
Atp2b3	NM_177236	320707	ATPase, Ca++ transporting, plasma membrane 3	-14.5072	-7.05314	7.45408	0.000267181	0.0129608	0.0279075	0.0297351	0.383464	0.163429
Pms2	NM_008886	18861	postmeiotic segregation increased 2 (S. cerevisiae)	-10.186	-1.03293	9.15306	0.0027328	0.648853	0.00522579	0.0630303	0.930326	0.111103
Lgtn	NA	NA	NA	-14.3181	-3.20183	11.1162	0.000351373	0.182143	0.00272524	0.0322881	0.627727	0.10513
Zfp414	NR_034153	328801	zinc finger protein 414	-13.2576	-0.27625	12.9814	0.000704519	0.900572	0.000839665	0.0396846	0.995128	0.103582
Epha3	NM_010140	13837	Eph receptor A3	14.5176	7.36001	-7.15758	0.000308481	0.0300537	0.0135909	0.0308212	0.393529	0.130307
Ankrd34a	NM_001024851	545554	ankyrin repeat domain 34A	-14.4834	-7.25725	7.22614	0.000755611	0.0205419	0.0437698	0.0405365	0.386911	0.197534
Fam129a	NM_022018	63913	family with sequence similarity 129, member A	-13.9463	-1.52512	12.4212	0.000531308	0.505458	0.00136626	0.0355233	0.859344	0.103582
Atp11c	NM_001037863	320940	ATPase, class VI, type 11C	-8.39683	-0.728305	7.66853	0.00518099	0.735977	0.00855549	0.0787037	0.958979	0.117927
Odc1	NM_013614	18263	ornithine decarboxylase, structural 1	-8.13861	-1.77636	6.36225	0.00577708	0.421875	0.0198151	0.0819783	0.82728	0.146112
Nipal4	NM_172524	214112	NIPA-like domain containing 4	-7.60836	-1.22397	6.38439	0.00866329	0.576674	0.0200907	0.0961195	0.897832	0.146503
Car14	NM_011797	23831	carbonic anhydrase 14	-10.0172	-2.14404	7.87318	0.0016933	0.336365	0.007432	0.0528695	0.754316	0.11461
Pex10	NM_001042407	668173	peroxisomal biogenesis factor 10	13.4734	12.5246	-0.948785	0.00104265	0.00179495	0.687237	0.0461801	0.383054	0.841677
Snx24	NM_029394	69226	sorting nexing 24	-11.2398	2.40534	13.6451	0.00318577	0.314642	0.000740577	0.0678146	0.744278	0.103582
Clic5	NM_172621	224796	chloride intracellular channel 5	-14.3119	-3.5038	10.8081	0.000405143	0.154622	0.00363571	0.0329348	0.586296	0.106093
Slc35c1	NM_211358	228368	solute carrier family 35, member C1	-7.6736	-3.5434	4.13019	0.00726547	0.13193	0.0895113	0.0889252	0.559475	0.276826
3110082I17Rik	NM_028469	73212	RIKEN cDNA 3110082I17 gene	13.6655	12.2658	-1.3997	0.000439622	0.00109745	0.528214	0.0337218	0.383054	0.721731
Esf1	NM_001081090	66580	ESF1, nucleolar pre-rRNA processing protein, homolog (S. cerevisiae)	-7.4465	-1.06137	6.38514	0.00831014	0.620035	0.0177199	0.0945756	0.91563	0.141022
Klf9	NM_010638	16601	Kruppel-like factor 9	-10.5789	-1.4342	9.14467	0.00112174	0.505365	0.00307153	0.0475691	0.859302	0.10513
Sectm1a	NM_145373	209588	secreted and transmembrane 1A	14.6001	3.76669	-10.8334	0.000646986	0.250028	0.0026248	0.0388378	0.686745	0.10513
Urgcp	NM_178623	72046	upregulator of cell proliferation	-14.3196	-4.00908	10.3105	0.000233262	0.0959615	0.00360758	0.0277959	0.508344	0.105768
Pldn	NA	NA	NA	-11.4286	2.09432	13.5229	0.00230329	0.363548	0.000607441	0.0595109	0.78047	0.103582
Tmtc1	NM_198967	387314	transmembrane and tetratricopeptide repeat containing 1	-13.9671	-2.35633	11.6108	0.000398796	0.305178	0.00184324	0.0329348	0.73697	0.10513
Tut1	NM_197993	70044	terminal uridylyl transferase 1, U6 snRNA-specific	10.8924	8.70007	-2.19237	0.00352465	0.01168	0.38557	0.0696746	0.383054	0.602184
Zfp354a	NM_009329	21408	zinc finger protein 354A	14.1464	8.72175	-5.42468	0.000679068	0.0160497	0.0537048	0.0389039	0.386911	0.213873
Plekha6	NM_182930	240753	pleckstrin homology domain containing, family A member 6	-10.7596	-3.70618	7.05345	0.00133799	0.12489	0.0162119	0.0497547	0.548038	0.136846
Sc5d	NM_172769	235293	sterol-C5-desaturase (fungal ERG3, delta-5-desaturase) homolog (S. cerevisae)	-13.565	-1.02646	12.5386	0.000450092	0.638048	0.000889846	0.0337218	0.924181	0.103582
Angptl1	NM_028333	72713	angiopoietin-like 1	9.51183	2.64875	-6.86308	0.0051812	0.297791	0.0233914	0.0787037	0.727508	0.154085
Tbc1d10a	NM_134023	103724	TBC1 domain family, member 10a	-13.4042	-0.720189	12.684	0.000836417	0.751836	0.00129444	0.0430071	0.964116	0.103582
Oaz2	NA	NA	NA	-10.8217	-2.24365	8.57803	0.00117358	0.319323	0.00537408	0.0481108	0.748301	0.11111
Hhip	NM_020259	15245	Hedgehog-interacting protein	-12.3728	0.872728	13.2455	0.00116141	0.693099	0.000661123	0.0481108	0.949124	0.103582
Cdkn1c	NM_009876	12577	cyclin-dependent kinase inhibitor 1C (P57)	14.1372	7.76516	-6.37204	0.0014911	0.0377078	0.0448058	0.051004	0.407405	0.199684
Grhl1	NM_145890	195733	grainyhead-like 1 (Drosophila)	14.1845	9.06029	-5.12421	0.000332951	0.00942662	0.0494525	0.0315318	0.383054	0.207631
Ift52	NM_172150	245866	intraflagellar transport 52 homolog (Chlamydomonas)	-13.9728	-2.47388	11.4989	0.00092129	0.321168	0.00370034	0.0436537	0.749783	0.106093
Gm884	NM_001033434	380730	predicted gene 884	14.5533	8.38301	-6.17028	0.000361785	0.0167037	0.0283004	0.0325993	0.386911	0.16403
Snap29	NM_023348	67474	synaptosomal-associated protein 29	-9.01847	1.1625	10.181	0.00455799	0.600011	0.00211839	0.0752048	0.908265	0.10513
Prodh	NM_011172	19125	proline dehydrogenase	-9.02272	-4.98084	4.04187	0.0042918	0.0565049	0.114923	0.0740815	0.43663	0.313153
Nebl	NM_028757	74103	nebulette	-13.5304	-0.959562	12.5708	0.000446068	0.658798	0.000846458	0.0337218	0.933818	0.103582
Hspa13	NR_027492	110920	heat shock protein 70 family, member 13	-12.2688	1.095	13.3638	0.00122562	0.621459	0.000603284	0.0484071	0.916421	0.103582
2900026A02Rik	NM_172884	243219	RIKEN cDNA 2900026A02 gene	-12.5724	0.663543	13.2359	0.00219364	0.781762	0.00152113	0.0585732	0.968756	0.103662
6430704M03Rik	NM_001142965	230235	RIKEN cDNA 6430704M03 gene	-13.9051	-2.33815	11.5669	0.000474198	0.314272	0.00209655	0.0339429	0.743949	0.10513
Ttc21a	NM_028735	74052	tetratricopeptide repeat domain 21A	-14.2083	-10.9695	3.23877	0.000337136	0.00106098	0.313009	0.0316056	0.383054	0.53787
Mtmr1	NM_016985	53332	myotubularin related protein 1	-13.082	-0.0166389	13.0653	0.00070938	0.993931	0.000716881	0.039781	1	0.103582
Mgat3	NM_010795	17309	mannoside acetylglucosaminyltransferase 3	-13.9537	-2.29448	11.6592	0.000291679	0.303759	0.001401	0.0303645	0.735141	0.103582
Speer6-ps1	NR_001581	73266	spermatogenesis associated glutamate (E)-rich protein 6, pseudogene 1	14.5312	5.8607	-8.67053	0.000860377	0.0928149	0.0105899	0.0433394	0.502576	0.122785
Pcgf6	NM_027654	71041	polycomb group ring finger 6	-10.2186	-3.87462	6.34396	0.00184154	0.114085	0.0243942	0.0549635	0.529414	0.155695
Pcdhb14	NM_053139	93885	protocadherin beta 14	-9.54526	-5.16674	4.37851	0.00579052	0.0683814	0.115254	0.0819783	0.454131	0.313778
Gnl3	NM_153547	30877	guanine nucleotide binding protein-like 3 (nucleolar)	-14.207	-3.45718	10.7498	0.000265272	0.142522	0.0027565	0.0297351	0.572261	0.10513
Grik1	NM_146072	14805	glutamate receptor, ionotropic, kainate 1	14.5186	8.71941	-5.79923	0.000375727	0.0136227	0.036229	0.0328516	0.386911	0.181605
Nrm	NM_134122	106582	nurim (nuclear envelope membrane protein)	-13.6455	-1.15866	12.4869	0.000512005	0.602332	0.00107967	0.035334	0.909204	0.103582
Mrm1	NM_145433	217038	mitochondrial rRNA methyltransferase 1 homolog (S. cerevisiae)	-14.2076	-3.14178	11.0658	0.000381142	0.18976	0.00283738	0.0328516	0.635514	0.10513
EG240055	NA	NA	NA	-13.1484	-0.389374	12.759	0.00243064	0.876414	0.00295815	0.0612178	0.990361	0.10513
Tmtc2	NM_177368	278279	transmembrane and tetratricopeptide repeat containing 2	-14.2461	-4.46397	9.78212	0.000214622	0.0667713	0.00483983	0.026395	0.451727	0.109025
Lrtm1	NM_176920	319476	leucine-rich repeats and transmembrane domains 1	-13.4583	-0.849289	12.6091	0.000555095	0.699806	0.000962784	0.0361086	0.950309	0.103582
Gng11	NM_025331	66066	guanine nucleotide binding protein (G protein), gamma 11	-13.6555	-1.3602	12.2953	0.000371353	0.531387	0.000935115	0.0328516	0.875943	0.103582
H2-T22	NM_010397	15039	histocompatibility 2, T region locus 22	-13.9025	-2.18974	11.7127	0.000291442	0.323059	0.00131401	0.0303645	0.750015	0.103582
4930455F23Rik	NM_029115	74895	RIKEN cDNA 4930455F23 gene	-10.4258	3.03899	13.4648	0.00782771	0.244168	0.00150202	0.0921114	0.681339	0.103582
Fdx1l	NM_001039824	68165	ferredoxin 1-like	-10.8208	-2.2794	8.54138	0.00138157	0.319697	0.00621096	0.0500208	0.748703	0.112806
2410129H14Rik	NA	NA	NA	-13.691	-1.51859	12.1724	0.000360693	0.486325	0.0010125	0.0325993	0.850195	0.103582
Pate2	NM_001033421	330921	prostate and testis expressed 2	10.9512	8.50673	-2.44445	0.0016509	0.00766827	0.301429	0.0528346	0.383054	0.525673
Mybl1	NM_008651	17864	myeloblastosis oncogene-like 1	-13.8129	-1.61176	12.2012	0.000399917	0.468272	0.00115731	0.0329348	0.846586	0.103582
Lrguk	NM_028886	74354	leucine-rich repeats and guanylate kinase domain containing	-10.9785	-5.31429	5.66424	0.000922935	0.0377292	0.037998	0.0436537	0.407405	0.185257
Bzrap1	NM_172449	207777	benzodiazepine receptor associated protein 1	-9.67849	-1.52345	8.15504	0.00291155	0.499847	0.00784127	0.0646462	0.856788	0.115791
Sema4b	NM_013659	20352	sema domain, immunoglobulin domain (Ig), transmembrane domain (TM) and short cytoplasmic domain, (semaphorin) 4B	-13.4978	-0.865728	12.6321	0.000532936	0.693959	0.0009355	0.0355233	0.949238	0.103582
Polg2	NR_027785	50776	polymerase (DNA directed), gamma 2, accessory subunit	-12.9158	-0.0907602	12.825	0.00226182	0.970391	0.00237211	0.0591078	1	0.10513
Eri2	NM_027698	71151	exoribonuclease 2	-12.8144	0.229778	13.0442	0.000825153	0.916197	0.000710239	0.0428351	0.998425	0.103582
Pln	NM_023129	18821	phospholamban	-14.3256	-5.99872	8.3269	0.00042645	0.0312841	0.018023	0.0336841	0.394474	0.141876
Fam151a	NM_146149	230579	family with sequence simliarity 151, member A	14.0606	8.61802	-5.4426	0.00115036	0.0211657	0.064797	0.0481108	0.386911	0.235651
H2-T9	NM_010399	15051	histocompatibility 2, T region locus 9	-13.8716	-2.16077	11.7108	0.000308345	0.330422	0.00135176	0.0308212	0.750015	0.103582
Gpr171	NM_173398	229323	G protein-coupled receptor 171	-14.0282	-2.39676	11.6314	0.00059177	0.316302	0.00251759	0.0374895	0.745268	0.10513
Ap4e1	NM_175550	108011	adaptor-related protein complex AP-4, epsilon 1	-8.12539	-1.61318	6.51221	0.00552133	0.459396	0.0172243	0.0809533	0.840626	0.140113
Nkiras2	NM_028024	71966	NFKB inhibitor interacting Ras-like protein 2	-12.3424	0.850597	13.193	0.00191486	0.715014	0.00116432	0.0556238	0.95515	0.103582
Map3k9	NM_177395	338372	mitogen-activated protein kinase kinase kinase 9	14.3313	10.1917	-4.13952	0.000590983	0.00661176	0.116327	0.0374895	0.383054	0.315082
Fam122a	NM_026520	68034	family with sequence similarity 122, member A	-12.958	-0.00886813	12.9491	0.00122378	0.996913	0.00123004	0.0484071	1	0.103582
Them4	NM_029431	75778	thioesterase superfamily member 4	-14.1726	-3.51783	10.6548	0.000547059	0.161152	0.00459418	0.0358817	0.596113	0.108858
Phf19	NM_028716	74016	PHD finger protein 19	14.4212	9.52968	-4.89157	0.000598981	0.010123	0.0751393	0.0375535	0.383054	0.252408
Cr1l	NM_013499	12946	complement component (3b/4b) receptor 1-like	-12.4052	0.653369	13.0586	0.00120875	0.768344	0.000796553	0.0484071	0.966472	0.103582
2210012G02Rik	NM_025617	66526	RIKEN cDNA 2210012G02 gene	-8.69305	-2.06545	6.6276	0.00326097	0.342915	0.0145433	0.0683183	0.761269	0.133521
Megf11	NM_172522	214058	multiple EGF-like-domains 11	-10.4606	3.14514	13.6058	0.00438214	0.19221	0.000595559	0.0743007	0.637905	0.103582
Lmf2	NM_178919	105847	lipase maturation factor 2	-12.3476	0.78412	13.1317	0.00131519	0.725557	0.000801124	0.0497547	0.95707	0.103582
Lepre1	NM_019783	56401	leprecan 1	9.01232	4.98972	-4.0226	0.00691921	0.075107	0.129094	0.0877727	0.467841	0.333341
Tmem109	NM_134142	68539	transmembrane protein 109	-12.886	-0.0353016	12.8507	0.00116661	0.987594	0.00119154	0.0481108	1	0.103582
Itpk1	NM_172584	217837	inositol 1,3,4-triphosphate 5/6 kinase	-13.1737	-0.393075	12.7806	0.000660897	0.857451	0.000853061	0.0388378	0.986915	0.103582
Apex1	NM_009687	11792	apurinic/apyrimidinic endonuclease 1	-12.3101	0.925109	13.2353	0.00277867	0.703614	0.0016847	0.063208	0.950942	0.10513
Rars	NM_025936	104458	arginyl-tRNA synthetase	-12.771	0.22298	12.994	0.000883767	0.91899	0.000764873	0.0435754	0.998425	0.103582
Myo3a	NM_148413	667663	myosin IIIA	13.8277	10.7585	-3.06923	0.00115964	0.00614725	0.238927	0.0481108	0.383054	0.462385
Phtf1	NM_013629	18685	putative homeodomain transcription factor 1	-13.3103	-0.700431	12.6098	0.000578955	0.748734	0.000915787	0.0370692	0.963012	0.103582
Fen1	NM_007999	14156	flap structure specific endonuclease 1	-13.3031	-0.943526	12.3596	0.00179163	0.701125	0.00295295	0.0541942	0.950309	0.10513
AI427809	NR_033140	381524	expressed sequence AI427809	10.0482	9.53031	-0.517928	0.00257799	0.00359537	0.815609	0.0620833	0.383054	0.924971
Met	NM_008591	17295	met proto-oncogene	-7.80976	-0.376774	7.43299	0.00892152	0.86429	0.0114434	0.0973553	0.987185	0.125299
Pdss1	NM_019501	56075	prenyl (solanesyl) diphosphate synthase, subunit 1	-13.8665	-2.3216	11.5449	0.000537336	0.321755	0.00229325	0.0355233	0.749907	0.10513
Cyp4a32	NM_001100181	100040843	cytochrome P450, family 4, subfamily a, polypeptide 32	-14.0558	-3.04611	11.0097	0.000303	0.189345	0.00235792	0.0307338	0.635514	0.10513
Ttc9	NM_001033149	69480	tetratricopeptide repeat domain 9	-13.8931	-2.63237	11.2608	0.000343684	0.249149	0.00201325	0.0318973	0.685243	0.10513
Ndfip2	NM_029561	76273	Nedd4 family interacting protein 2	-8.17513	0.207122	8.38225	0.00797232	0.925512	0.00696499	0.0928371	0.999541	0.113692
Zkscan17	NM_172941	268417	zinc finger with KRAB and SCAN domains 17	-13.8101	-2.02704	11.783	0.00038335	0.366169	0.00147528	0.0328516	0.783045	0.103582
Psmd10	NM_016883	53380	proteasome (prosome, macropain) 26S subunit, non-ATPase, 10	-13.5226	-1.40877	12.1139	0.000508828	0.525675	0.00127912	0.035334	0.871679	0.103582
Lgals12	NM_019516	56072	lectin, galactose binding, soluble 12	14.3866	6.38592	-8.00072	0.000725134	0.0659808	0.0129626	0.0402525	0.45057	0.129033
1500035H01Rik	NA	NA	NA	-10.692	-2.47825	8.21374	0.0012106	0.273122	0.00662889	0.0484071	0.705397	0.112886
Mir339	NR_029768	723898	microRNA 339	14.3738	0	-14.3738	0.000849423	1	0.000430952	0.0431972	1	0.103582
Ces5	NA	NA	NA	-14.1731	-4.3483	9.8248	0.000888796	0.11136	0.0100221	0.0435754	0.525171	0.121416
Clec4f	NM_016751	51811	C-type lectin domain family 4, member f	13.9369	5.4676	-8.46932	0.001243	0.114222	0.0122235	0.0486353	0.529695	0.127154
Grpel2	NM_021296	17714	GrpE-like 2, mitochondrial	-8.4332	-1.17086	7.26233	0.00590931	0.599032	0.0128293	0.0827839	0.907619	0.129002
A330040F15Rik	NR_015503	74333	RIKEN cDNA A330040F15 gene	10.1978	8.85527	-1.34255	0.00353215	0.00783532	0.56879	0.0696746	0.383054	0.7557
Pigg	NM_001081234	433931	phosphatidylinositol glycan anchor biosynthesis, class G	-10.1871	-1.23985	8.9472	0.00443098	0.606741	0.00895136	0.0743007	0.910645	0.118513
Kctd9	NM_134073	105440	potassium channel tetramerisation domain containing 9	9.40887	7.84253	-1.56634	0.00713379	0.0170795	0.524884	0.0885143	0.386911	0.719563
Mastl	NM_025979	67121	microtubule associated serine/threonine kinase-like	-8.85719	-0.151346	8.70585	0.00757289	0.948178	0.00827963	0.0908405	1	0.117345
Arrdc1	NR_027876	215705	arrestin domain containing 1	14.0334	11.1341	-2.89925	0.000265229	0.00192154	0.205189	0.0297351	0.383054	0.428492
Lsm1	NM_026032	67207	LSM1 homolog, U6 small nuclear RNA associated (S. cerevisiae)	12.526	12.9162	0.390163	0.00134559	0.00106097	0.863379	0.0497547	0.383054	0.95119
Gtf2h2	NM_022011	23894	general transcription factor II H, polypeptide 2	-13.9418	-2.7431	11.1987	0.00035386	0.234341	0.00219299	0.0323564	0.671582	0.10513
F830016B08Rik	NM_001101475	240328	RIKEN cDNA F830016B08 gene	-8.99604	-1.48278	7.51326	0.00449349	0.512384	0.0117745	0.0746674	0.863839	0.126921
Bri3	NM_018772	55950	brain protein I3	8.12243	2.56022	-5.56221	0.00758228	0.281921	0.0394501	0.0908405	0.712362	0.188148
Slc6a19	NM_028878	74338	solute carrier family 6 (neurotransmitter transporter), member 19	14.1557	10.7551	-3.4006	0.00107532	0.00658226	0.202976	0.0467268	0.383054	0.425578
Gm5077	NM_173864	317677	predicted gene 5077	13.9152	6.51196	-7.40328	0.00120362	0.065759	0.0213771	0.0484071	0.45057	0.149906
Birc5	NM_009689	11799	baculoviral IAP repeat-containing 5	-14.006	-3.00446	11.0015	0.000438125	0.207592	0.00298083	0.0337218	0.659591	0.10513
Stra6	NM_009291	20897	stimulated by retinoic acid gene 6	-13.9519	-5.14109	8.8108	0.00066769	0.0595438	0.0147047	0.0388838	0.439639	0.133772
Grin3a	NM_001033351	242443	glutamate receptor ionotropic, NMDA3A	13.9899	11.1186	-2.87124	0.000912695	0.00452886	0.259373	0.0436537	0.383054	0.482774
5730508B09Rik	NM_027482	70617	RIKEN cDNA 5730508B09 gene	-14.0004	-3.05511	10.9453	0.000610019	0.214359	0.00386192	0.0377439	0.660911	0.106221
Dpp7	NM_031843	83768	dipeptidylpeptidase 7	13.8265	11.7555	-2.07106	0.000356983	0.00141607	0.356312	0.0324819	0.383054	0.577226
Ccdc96	NM_025725	66717	coiled-coil domain containing 96	11.0643	6.24862	-4.81568	0.0011819	0.0287903	0.060825	0.0481108	0.393529	0.227398
Gm5878	NM_001034902	545861	predicted gene 5878	-13.9799	-3.25259	10.7273	0.00113601	0.216539	0.00661438	0.047924	0.663623	0.112886
Fscb	NM_001163271	623046	fibrous sheath CABYR binding protein	14.3148	0	-14.3148	0.000937741	1	0.00047962	0.0437937	1	0.103582
Abcc10	NM_170680	224814	ATP-binding cassette, sub-family C (CFTR/MRP), member 10	-8.84233	-2.2583	6.58403	0.00395556	0.317426	0.0186024	0.0723381	0.746303	0.143609
Abcb1b	NM_011075	18669	ATP-binding cassette, sub-family B (MDR/TAP), member 1B	-11.9554	1.12504	13.0804	0.00345547	0.645974	0.00188518	0.0692265	0.929214	0.10513
Zfp385c	NM_177790	278304	zinc finger protein 385C	-12.3424	0.616972	12.9593	0.0019235	0.790551	0.00134084	0.0557874	0.971031	0.103582
Sh2b3	NM_008507	16923	SH2B adaptor protein 3	11.9179	13.1158	1.19792	0.00220773	0.00108419	0.607089	0.0586265	0.383054	0.784297
BC052688	NR_028430	432812	cDNA sequence BC052688	13.8774	0	-13.8774	0.00155318	1	0.000821276	0.0514825	1	0.103582
Lrrc39	NM_175413	109245	leucine rich repeat containing 39	13.7014	11.8729	-1.82847	0.000403538	0.00135143	0.413258	0.0329348	0.383054	0.629382
Slc22a1	NM_009202	20517	solute carrier family 22 (organic cation transporter), member 1	13.8687	0	-13.8687	0.00100852	1	0.000504164	0.0456589	1	0.103582
Sema4f	NM_011350	20355	sema domain, immunoglobulin domain (Ig), TM domain, and short cytoplasmic domain	13.8192	10.3118	-3.50739	0.000858697	0.0064712	0.173763	0.0433394	0.383054	0.388179
Ighmbp2	NM_009212	20589	immunoglobulin mu binding protein 2	-14.0073	-3.54579	10.4615	0.000389635	0.142509	0.00392535	0.0329348	0.572261	0.106402
Tmc5	NM_028930	74424	transmembrane channel-like gene family 5	13.7847	10.1564	-3.6283	0.000563365	0.00539489	0.144729	0.0363096	0.383054	0.353226
Tbc1d12	NM_145952	209478	TBC1D12: TBC1 domain family, member 12	9.60367	7.24348	-2.3602	0.00610543	0.0231814	0.347669	0.0835144	0.386911	0.568333
Pafah2	NM_133880	100163	platelet-activating factor acetylhydrolase 2	-13.807	-3.13686	10.6701	0.000599224	0.198372	0.00417873	0.0375535	0.647796	0.107526
Ap1s1	NM_007457	11769	adaptor protein complex AP-1, sigma 1	-12.3922	0.509413	12.9017	0.0012283	0.818219	0.000887617	0.0484071	0.978408	0.103582
9530082P21Rik	NR_015472	638247	RIKEN cDNA 9530082P21 gene	12.5433	12.9452	0.401917	0.00297029	0.00241646	0.871496	0.065017	0.383054	0.955562
Slc16a12	NM_172838	240638	solute carrier family 16 (monocarboxylic acid transporters), member 12	14.2145	7.92102	-6.2935	0.000274615	0.0187339	0.0205395	0.0297351	0.386911	0.147386
Olfr635	NM_147118	259122	olfactory receptor 635	14.1719	10.011	-4.16084	0.000520591	0.00648159	0.107743	0.035334	0.383054	0.303432
Fbxl6	NM_013909	30840	F-box and leucine-rich repeat protein 6	-13.897	-4.37979	9.51724	0.00116965	0.11376	0.0127586	0.0481108	0.528814	0.128879
Slc22a20	NM_198650	381203	solute carrier family 22 (organic anion transporter), member 20	13.2662	12.2055	-1.06067	0.00177807	0.00311261	0.667392	0.0540752	0.383054	0.828816
Prdx5	NM_012021	54683	peroxiredoxin 5	-12.5722	0.30472	12.8769	0.00103762	0.889865	0.000852566	0.0461801	0.994563	0.103582
Cpne4	NM_028719	74020	copine IV	13.8458	7.96534	-5.88049	0.00131034	0.0304303	0.0511463	0.0497547	0.393529	0.2099
Polh	NM_030715	80905	polymerase (DNA directed), eta (RAD 30 related)	13.2945	12.517	-0.777574	0.0015616	0.00237589	0.748532	0.051546	0.383054	0.883334
Bcat1	NM_007532	12035	branched chain aminotransferase 1, cytosolic	-7.92574	-0.385322	7.54042	0.00865357	0.861849	0.0111373	0.0961195	0.987185	0.12484
2010000I03Rik	NA	NA	NA	-12.4901	0.322419	12.8125	0.00216765	0.89186	0.00180952	0.0585732	0.994616	0.10513
Trim66	NM_181853	330627	tripartite motif-containing 66	-13.7265	-2.10825	11.6183	0.000553574	0.362011	0.00209527	0.0361086	0.778793	0.10513
Adra1a	NM_013461	11549	adrenergic receptor, alpha 1a	-12.9986	-0.659382	12.3392	0.00224351	0.789134	0.00316687	0.0589488	0.970299	0.105166
Per2	NM_011066	18627	period homolog 2 (Drosophila)	-13.319	-1.26747	12.0515	0.000813898	0.578903	0.00177836	0.0425738	0.898845	0.10513
Sfmbt2	NM_177386	353282	Scm-like with four mbt domains 2	-13.8721	-4.62018	9.25196	0.00122538	0.100257	0.0150377	0.0484071	0.510552	0.134644
Gpr88	NM_022427	64378	G-protein coupled receptor 88	-9.14014	-2.25067	6.88947	0.00423852	0.331282	0.0184266	0.0739234	0.750015	0.143353
Tmem14c	NM_025387	66154	transmembrane protein 14C	-13.2369	-0.91996	12.317	0.000770057	0.681855	0.00137249	0.0411925	0.94375	0.103582
Rad51	NM_011234	19361	RAD51 homolog (S. cerevisiae)	-13.8845	-5.31482	8.56969	0.000443648	0.0442366	0.0139747	0.0337218	0.418207	0.131373
Ttpa	NM_015767	50500	tocopherol (alpha) transfer protein	8.91695	0.509233	-8.40771	0.00865814	0.836916	0.01103	0.0961195	0.98189	0.124798
Ubqlnl	NM_198624	244179	ubiquilin-like	14.1761	9.65714	-4.519	0.000915911	0.010984	0.103322	0.0436537	0.383054	0.297713
Zfp791	NM_001037745	244556	zinc finger protein 791	-14.0623	-5.42422	8.63807	0.000538823	0.0467849	0.0152825	0.0355233	0.423217	0.135083
Peci	NA	NA	NA	-12.3068	0.588587	12.8954	0.00162731	0.795734	0.00113722	0.0524124	0.971917	0.103582
Ms4a4c	NM_029499	64380	membrane-spanning 4-domains, subfamily A, member 4C	-13.6259	-2.19361	11.4323	0.000487333	0.336027	0.0020404	0.0343949	0.753938	0.10513
Fzd1	NM_021457	14362	frizzled homolog 1 (Drosophila)	-13.6867	-2.67587	11.0108	0.000753373	0.270189	0.00377236	0.0405365	0.701825	0.106093
1700008J07Rik	NR_024331	629159	RIKEN cDNA 1700008J07 gene	-13.968	-4.11699	9.85099	0.000620896	0.110948	0.0075362	0.0379114	0.524838	0.11461
Gp1bb	NM_010327	14724	glycoprotein Ib, beta polypeptide	-13.5542	-2.18852	11.3657	0.0016619	0.392831	0.00524331	0.0528488	0.803143	0.111103
Ostc	NM_025509	66357	oligosaccharyltransferase complex subunit	-9.38719	0.205408	9.5926	0.00372289	0.925586	0.0032542	0.0709489	0.999541	0.105166
Timm13	NM_013895	30055	translocase of inner mitochondrial membrane 13 homolog (yeast)	-13.1445	-0.773541	12.371	0.00071594	0.726417	0.00117764	0.040028	0.957244	0.103582
Usp36	NM_001033528	72344	ubiquitin specific peptidase 36	-12.0881	0.763451	12.8515	0.00172954	0.735553	0.00107832	0.0533283	0.958979	0.103582
Atp6v0d2	NM_175406	242341	ATPase, H+ transporting, lysosomal V0 subunit D2	14.019	10.2304	-3.78855	0.000519282	0.0053477	0.132767	0.035334	0.383054	0.33821
Ccdc124	NM_026964	234388	coiled-coil domain containing 124	-13.1951	-1.02539	12.1697	0.000685569	0.64388	0.00132821	0.0390354	0.928064	0.103582
Pxmp4	NM_021534	59038	peroxisomal membrane protein 4	10.7513	7.54892	-3.20237	0.00168591	0.0132291	0.185187	0.0528614	0.385412	0.403752
Aim1	NM_172393	11630	absent in melanoma 1	-12.8035	-0.294618	12.5089	0.00104491	0.89513	0.00125584	0.0461801	0.995128	0.103582
Dlat	NM_145614	235339	dihydrolipoamide S-acetyltransferase (E2 component of pyruvate dehydrogenase complex)	-12.5888	0.152584	12.7414	0.00103879	0.944748	0.000941513	0.0461801	1	0.103582
1300018I17Rik	NM_028200	72325	RIKEN cDNA 1300018I17 gene	8.54792	5.84561	-2.7023	0.00791408	0.0413073	0.270887	0.0926237	0.411871	0.495162
Gsg2	NM_010353	14841	germ cell-specific gene 2	-13.9693	-3.80624	10.163	0.00109468	0.156732	0.00878145	0.0470356	0.590234	0.118263
Cnot6	NM_212484	104625	CCR4-NOT transcription complex, subunit 6	-12.1649	0.699015	12.8639	0.00151779	0.754754	0.000977466	0.0513107	0.96488	0.103582
Yipf4	NM_026417	67864	Yip1 domain family, member 4	-13.8455	-3.3915	10.454	0.000470379	0.160873	0.00416123	0.0339429	0.595557	0.107526
H2afj	NM_177688	232440	H2A histone family, member J	-12.9147	-0.493594	12.4211	0.00156753	0.833796	0.00207572	0.051546	0.981141	0.10513
Cyp2c39	NM_010003	13098	cytochrome P450, family 2, subfamily c, polypeptide 39	14.1908	0	-14.1908	0.00107994	1	0.00055731	0.0467268	1	0.103582
Hddc3	NM_026812	68695	HD domain containing 3	14.1835	7.66886	-6.51463	0.000841469	0.0324574	0.0312949	0.0431231	0.398845	0.170376
Crlf3	NM_018776	54394	cytokine receptor-like factor 3	-13.2356	-1.24198	11.9936	0.00124172	0.600137	0.0025362	0.0486353	0.908284	0.10513
Lrrc27	NM_027164	76612	leucine rich repeat containing 27	-13.1423	-0.917534	12.2248	0.000705522	0.678369	0.00127573	0.0396846	0.942621	0.103582
Tmem149	NM_145580	101883	transmembrane protein 149	-10.6178	-6.33957	4.27823	0.00325062	0.0329919	0.131451	0.0682139	0.399225	0.336612
Fastkd5	NM_198176	380601	FAST kinase domains 5	-12.9546	-0.442519	12.512	0.000873635	0.841919	0.00115661	0.0435064	0.983096	0.103582
Ppp1r12c	NM_029834	232807	protein phosphatase 1, regulatory (inhibitor) subunit 12C	-12.3181	0.452378	12.7705	0.00141207	0.839763	0.00106354	0.0500208	0.982104	0.103582
Arx	NM_007492	11878	aristaless related homeobox	-13.7967	-5.97222	7.82445	0.000730598	0.0353839	0.0267639	0.0402722	0.399779	0.161048
C030019I05Rik	NM_177075	320116	RIKEN cDNA C030019I05 gene	-10.0989	-1.28476	8.81412	0.00414675	0.589109	0.00875855	0.0736205	0.904246	0.118263
Gm13177	NM_001081248	435815	predicted gene 13177	13.7475	0	-13.7475	0.00169756	1	0.000899894	0.0528695	1	0.103582
Arid5a	NR_033310	214855	AT rich interactive domain 5A (MRF1-like)	-13.4816	-2.0255	11.4561	0.000897152	0.394731	0.00299884	0.0435941	0.804587	0.10513
Gm12824	NM_001085549	666048	predicted gene 12824	13.7322	6.9843	-6.7479	0.000912113	0.0454425	0.0249154	0.0436537	0.421925	0.156377
Cdc16	NM_027276	69957	CDC16 cell division cycle 16 homolog (S. cerevisiae)	-12.8842	-0.470025	12.4142	0.000944489	0.83282	0.00127028	0.0437937	0.981117	0.103582
2310022A10Rik	NM_175107	66367	RIKEN cDNA 2310022A10 gene	-9.86219	3.30316	13.1654	0.00752166	0.184676	0.00101054	0.0904256	0.631415	0.103582
Hdhd3	NM_024257	72748	haloacid dehalogenase-like hydrolase domain containing 3	13.9325	10.7171	-3.21536	0.00174151	0.00859795	0.242737	0.0536084	0.383054	0.466098
Pak7	NM_172858	241656	p21 protein (Cdc42/Rac)-activated kinase 7	-13.1411	-1.02939	12.1117	0.000754851	0.644573	0.00145588	0.0405365	0.92829	0.103582
Fam84a	NM_029007	105005	family with sequence similarity 84, member A	9.20809	1.63252	-7.57557	0.00615706	0.510908	0.0150442	0.0836045	0.862604	0.134644
Polr2j	NM_011293	20022	polymerase (RNA) II (DNA directed) polypeptide J	9.2643	7.35152	-1.91278	0.00844221	0.0240613	0.447617	0.0950381	0.386911	0.664403
Plekhh3	NM_146030	217198	pleckstrin homology domain containing, family H (with MyTH4 domain) member 3	-13.7731	-5.43546	8.33765	0.000521062	0.0424181	0.0168801	0.035334	0.413532	0.139319
Tnfrsf14	NM_178931	230979	tumor necrosis factor receptor superfamily, member 14 (herpesvirus entry mediator)	13.5179	10.6987	-2.81924	0.00177998	0.00763188	0.287654	0.0540752	0.383054	0.509293
Sass6	NM_028349	72776	spindle assembly 6 homolog (C. elegans)	-7.97412	-0.592625	7.38149	0.00839657	0.789432	0.012381	0.0950319	0.970299	0.127393
Smug1	NM_027885	71726	single-strand selective monofunctional uracil DNA glycosylase	-11.0732	2.09485	13.1681	0.0040805	0.384982	0.00119579	0.0733952	0.795508	0.103582
Pacrgl	NM_025755	66768	PARK2 co-regulated-like	-12.8434	-0.370469	12.473	0.00132636	0.871929	0.00165215	0.0497547	0.989764	0.10513
Abca5	NM_147219	217265	ATP-binding cassette, sub-family A (ABC1), member 5	-8.16414	-2.82621	5.33793	0.00819726	0.24004	0.0503092	0.0939824	0.678966	0.208962
Herc4	NM_030114	67345	hect domain and RLD 4	-8.77554	-0.920424	7.85512	0.0047649	0.675702	0.008813	0.0769766	0.94132	0.118263
Lss	NM_146006	16987	lanosterol synthase	-8.35541	-0.68093	7.67448	0.00837846	0.765931	0.0127777	0.0949457	0.966319	0.128879
Stk31	NM_029916	77485	serine threonine kinase 31	14.1271	3.24703	-10.88	0.000901658	0.317699	0.00281558	0.0436537	0.746587	0.10513
Zfp7	NM_145916	223669	zinc finger protein 7	13.819	11.2969	-2.52207	0.000908082	0.00380567	0.310175	0.0436537	0.383054	0.53508
Tgtp2	NM_001145164	100039796	T-cell specific GTPase 2	-9.72235	-0.603538	9.11881	0.0034181	0.787516	0.00501743	0.0692265	0.969922	0.109949
S1pr2	NM_010333	14739	sphingosine-1-phosphate receptor 2	-12.6327	-0.0852266	12.5475	0.00112261	0.96945	0.00118407	0.0475691	1	0.103582
Fkbp4	NM_010219	14228	FK506 binding protein 4	-10.4628	2.67624	13.139	0.00513397	0.268521	0.00100662	0.0785593	0.700477	0.103582
Rragd	NM_027491	52187	Ras-related GTP binding D	-12.2291	0.526502	12.7556	0.00148896	0.81403	0.00107036	0.051004	0.976526	0.103582
AI593442	NM_178906	330941	expressed sequence AI593442	-10.3365	-4.13295	6.20356	0.00250993	0.105503	0.0344223	0.0617895	0.517536	0.177831
Osbpl6	NM_145525	99031	oxysterol binding protein-like 6	-13.4611	-1.85318	11.608	0.000656203	0.419148	0.00211482	0.0388378	0.825452	0.10513
Cdh18	NM_001081299	320865	cadherin 18	-13.936	-5.858	8.07796	0.00150658	0.0553287	0.0316535	0.0510337	0.433446	0.171289
Nat6	NM_019750	56441	N-acetyltransferase 6	13.1781	11.8476	-1.33059	0.000950551	0.00212232	0.565293	0.0437937	0.383054	0.752752
Eif4ebp3	NM_201256	108112	eukaryotic translation initiation factor 4E binding protein 3	9.27033	5.84702	-3.42331	0.00415536	0.0371905	0.164733	0.0736205	0.405595	0.376665
Hsd17b7	NM_010476	15490	hydroxysteroid (17-beta) dehydrogenase 7	-12.8019	-0.396706	12.4052	0.000979131	0.858289	0.00125832	0.0447907	0.987042	0.103582
Atg16l2	NM_001111111	73683	autophagy related 16 like 2 (S. cerevisiae)	-13.6651	-2.75392	10.9112	0.000676622	0.252564	0.00368203	0.0388838	0.689833	0.106093
Jag1	NM_013822	16449	jagged 1	-13.1315	-0.915842	12.2156	0.000907644	0.686073	0.0015975	0.0436537	0.946407	0.10513
Ubox5	NM_080562	140629	U box domain containing 5	-12.2657	0.527872	12.7936	0.00148027	0.813902	0.0010645	0.051004	0.976526	0.103582
Bin3	NM_021328	57784	bridging integrator 3	-13.2059	-1.08485	12.1211	0.000906209	0.634674	0.00176086	0.0436537	0.922539	0.10513
Vmn2r82	NM_001101572	624845	vomeronasal 2, receptor 82	-13.9277	-10.6766	3.2511	0.00166298	0.0048226	0.33117	0.0528488	0.383054	0.555455
Apbb1	NM_009685	11785	amyloid beta (A4) precursor protein-binding, family B, member 1	-12.9768	-0.780186	12.1966	0.000888457	0.726983	0.00145389	0.0435754	0.957244	0.103582
Mcat	NM_001030014	223722	malonyl CoA:ACP acyltransferase (mitochondrial)	13.7551	10.5745	-3.18057	0.000441184	0.00348719	0.181657	0.0337218	0.383054	0.399233
Zfp286	NM_138949	192651	zinc finger protein 286	-13.7156	-6.2761	7.43948	0.00143664	0.0405948	0.0418772	0.05041	0.411871	0.193692
Kif16b	NM_001081133	16558	kinesin family member 16B	-12.2305	0.475994	12.7065	0.00152287	0.831932	0.00113144	0.0513107	0.981117	0.103582
Olfr850	NM_146523	258516	olfactory receptor 850	14.0829	0	-14.0829	0.00129272	1	0.000677257	0.0494279	1	0.103582
BC049635	NM_177785	277773	cDNA sequence BC049635	13.65	5.25241	-8.39757	0.00161618	0.129714	0.0138011	0.0523551	0.554962	0.131027
1700029H14Rik	NM_025601	66501	RIKEN cDNA 1700029H14 gene	-13.9033	-11.8043	2.09903	0.00078166	0.00122648	0.482759	0.0413069	0.383054	0.687772
Rufy1	NM_172557	216724	RUN and FYVE domain containing 1	9.6177	9.08273	-0.53497	0.00603139	0.00817733	0.821992	0.0832376	0.383054	0.927938
Cym	NM_001111143	229697	chymosin	14.0727	5.96682	-8.10585	0.00121108	0.0896439	0.01544	0.0484071	0.498792	0.135435
Accn3	NM_183000	171209	amiloride-sensitive cation channel 3	-13.7045	-8.21674	5.48776	0.00219941	0.0188693	0.127018	0.0585732	0.386911	0.330567
Prr11	NM_175563	270906	proline rich 11	-12.4252	0.124248	12.5495	0.001483	0.956178	0.00137412	0.051004	1	0.103582
4930513N10Rik	NR_015574	319960	RIKEN cDNA 4930513N10 gene	-13.7028	-9.27762	4.42518	0.00157454	0.0084771	0.198779	0.051546	0.383054	0.41914
B3gat1	NM_029792	76898	beta-1,3-glucuronyltransferase 1 (glucuronosyltransferase P)	-13.5014	-2.64146	10.86	0.000777199	0.272026	0.00390677	0.0413069	0.703939	0.106387
Ddx28	NM_028038	71986	DEAD (Asp-Glu-Ala-Asp) box polypeptide 28	-13.8399	-4.1015	9.73843	0.00133907	0.137636	0.0119918	0.0497547	0.566476	0.127154
Hes5	NM_010419	15208	hairy and enhancer of split 5 (Drosophila)	9.40558	-1.41126	-10.8168	0.00682462	0.582415	0.00307281	0.0871747	0.901395	0.10513
Chdh	NM_175343	218865	choline dehydrogenase	-12.1843	0.514143	12.6984	0.00248615	0.827954	0.00185929	0.0615306	0.980485	0.10513
Ccdc40	NM_175430	207607	coiled-coil domain containing 40	13.5661	10.1927	-3.37344	0.000861558	0.00633907	0.182012	0.0433394	0.383054	0.399728
Prmt5	NM_013768	27374	protein arginine N-methyltransferase 5	-12.9406	-0.74626	12.1944	0.00225737	0.761774	0.0033426	0.0591078	0.96548	0.105166
Centb1	NA	NA	NA	13.627	8.16248	-5.46456	0.00104797	0.0236363	0.0556127	0.0462052	0.386911	0.217003
Acox2	NM_053115	93732	acyl-Coenzyme A oxidase 2, branched chain	14.0501	8.2225	-5.8276	0.00102305	0.0249463	0.0493915	0.0459804	0.391179	0.207516
Gcc1	NM_028900	74375	golgi coiled coil 1	-13.5717	-2.66457	10.9072	0.000532991	0.253506	0.00299532	0.0355233	0.690825	0.10513
Tpm2	NM_009416	22004	tropomyosin 2, beta	13.3654	11.1275	-2.23786	0.00115786	0.00415277	0.362018	0.0481108	0.383054	0.58265
Mknk2	NM_021462	17347	MAP kinase-interacting serine/threonine kinase 2	-12.6265	-0.122576	12.5039	0.00117528	0.956268	0.00126835	0.0481108	1	0.103582
Slc9a10	NM_198106	208169	solute carrier family 9, member 10	13.9854	9.35681	-4.62857	0.000579144	0.00965841	0.0799983	0.0370692	0.383054	0.260103
Plek2	NM_013738	27260	pleckstrin 2	10.4022	2.32278	-8.07939	0.00510512	0.398347	0.015554	0.0783138	0.807084	0.135459
Gm1337	NM_001081971	383787	predicted gene 1337	-13.8698	-13.8698	0	0.00171283	0.000875658	1	0.0529496	0.383054	1
Pgam5	NM_028273	72542	phosphoglycerate mutase family member 5	-8.68189	-1.39139	7.2905	0.00844293	0.557197	0.0193559	0.0950381	0.888915	0.145382
Slc35b1	NM_016752	110172	solute carrier family 35, member B1	-10.2826	-2.01999	8.26265	0.00321501	0.398142	0.0108271	0.0681245	0.807084	0.123827
Mrpl36	NM_053163	94066	mitochondrial ribosomal protein L36	-10.3094	2.79948	13.1089	0.00733516	0.268591	0.00150767	0.0892821	0.700519	0.103582
Olfr2	NM_010983	18317	olfactory receptor 2	13.9673	9.24548	-4.72178	0.00111026	0.0143999	0.0944193	0.0474854	0.386911	0.284469
Cdkl3	NM_153785	213084	cyclin-dependent kinase-like 3	-13.4238	-2.41191	11.0119	0.000669958	0.302483	0.00308355	0.0388838	0.733501	0.10513
Larp6	NM_026235	67557	La ribonucleoprotein domain family, member 6	-11.4229	1.51579	12.9387	0.00523285	0.546979	0.00237033	0.0792916	0.883947	0.10513
Gars	NM_180678	353172	glycyl-tRNA synthetase	-9.50878	-1.24676	8.26201	0.00671501	0.605741	0.0136332	0.0866186	0.91033	0.130376
Sgms2	NM_028943	74442	sphingomyelin synthase 2	-12.6941	-0.406207	12.2879	0.00144226	0.859665	0.00183586	0.0504951	0.987185	0.10513
Armc3	NM_001081083	70882	armadillo repeat containing 3	8.69318	4.27237	-4.4208	0.00549789	0.098737	0.0842402	0.0809084	0.509131	0.267398
Plekha3	NM_031256	83435	pleckstrin homology domain-containing, family A (phosphoinositide binding specific) member 3	-12.5705	-0.0602377	12.5103	0.00139542	0.978808	0.00144696	0.0500208	1	0.103582
Slc36a4	NM_172289	234967	solute carrier family 36 (proton/amino acid symporter), member 4	-12.543	-0.092811	12.4502	0.00140636	0.967323	0.00148759	0.0500208	1	0.103582
Hccs	NM_008222	15159	holocytochrome c synthetase	-13.3545	-2.14915	11.2054	0.000774683	0.358187	0.00294459	0.0413069	0.774853	0.10513
Tnfrsf13c	NM_028075	72049	tumor necrosis factor receptor superfamily, member 13c	9.52737	7.2491	-2.27827	0.00731643	0.0254531	0.371866	0.0892293	0.392646	0.591784
Pacs1	NM_153129	107975	phosphofurin acidic cluster sorting protein 1	-11.9604	0.775656	12.736	0.00200738	0.733617	0.00125054	0.0571488	0.958979	0.103582
Klhl30	NM_027551	70788	kelch-like 30 (Drosophila)	14.0006	4.62132	-9.3793	0.000855459	0.167728	0.00574306	0.0433394	0.607724	0.111349
Atp5s	NM_026536	68055	ATP synthase, H+ transporting, mitochondrial F0 complex, subunit s	13.5337	9.33726	-4.19647	0.00112503	0.0121328	0.119041	0.0475691	0.383054	0.319315
Bmp2	NM_007553	12156	bone morphogenetic protein 2	13.5688	0	-13.5688	0.00156991	1	0.000813439	0.051546	1	0.103582
Socs3	NM_007707	12702	suppressor of cytokine signaling 3	-12.3127	0.263441	12.5762	0.00166578	0.907786	0.00141959	0.0528488	0.996852	0.103582
Klk7	NM_011872	23993	kallikrein related-peptidase 7 (chymotryptic, stratum corneum)	13.5639	9.05984	-4.50401	0.00162173	0.0173863	0.1131	0.0523717	0.386911	0.310833
Dis3l2	NM_153530	208718	DIS3 mitotic control homolog (S. cerevisiae)-like 2	-13.453	-2.05035	11.4027	0.00107564	0.397134	0.00351748	0.0467268	0.806257	0.105473
Btbd10	NM_133700	68815	BTB (POZ) domain containing 10	-10.2434	-2.21189	8.03146	0.0035311	0.361874	0.0131137	0.0696746	0.778793	0.129033
Fbxl8	NM_015821	50788	F-box and leucine-rich repeat protein 8	13.4192	10.2654	-3.15379	0.00203909	0.0101336	0.245534	0.0574382	0.383054	0.469469
Pja1	NM_008853	18744	praja1, RING-H2 motif containing	-8.34755	-1.73976	6.60779	0.00814198	0.456767	0.0241612	0.0936091	0.838212	0.155668
Dpep1	NM_007876	13479	dipeptidase 1 (renal)	-13.8233	-9.5725	4.25079	0.00139167	0.00686027	0.213061	0.0500208	0.383054	0.438599
Rab22a	NM_024436	19334	RAB22A, member RAS oncogene family	-12.4283	-0.0327498	12.3955	0.00147662	0.988439	0.00150595	0.051004	1	0.103582
Gm14005	NR_028591	100043424	predicted gene 14005	-13.6375	-3.48152	10.156	0.00060026	0.15592	0.0054105	0.0375535	0.588739	0.11111
Faf2	NM_178397	76577	Fas associated factor family member 2	-11.4844	1.32484	12.8092	0.00268325	0.565317	0.00119441	0.0628597	0.891082	0.103582
Ppp4r4	NM_028980	74521	protein phosphatase 4, regulatory subunit 4	10.1264	6.06003	-4.06639	0.00634893	0.0559661	0.145942	0.0847224	0.435573	0.354278
Eif4e3	NM_025829	66892	eukaryotic translation initiation factor 4E member 3	-9.0124	0.387881	9.40029	0.00560747	0.862927	0.00438803	0.0813328	0.987185	0.108049
B4galnt2	NM_008081	14422	beta-1,4-N-acetyl-galactosaminyl transferase 2	13.3606	10.7741	-2.58651	0.000830763	0.00400583	0.282518	0.0428351	0.383054	0.505552
Psph	NM_133900	100678	phosphoserine phosphatase	-12.8822	-0.85639	12.0258	0.001345	0.712092	0.00222901	0.0497547	0.95515	0.10513
2012-09-05	NM_213614	18951	septin 5	-13.5623	-4.35278	9.20951	0.00103809	0.104644	0.0128946	0.0461801	0.517536	0.129033
LOC100303645	NA	NA	NA	-13.7985	-13.7985	0	0.00179849	0.000920861	1	0.0541942	0.383054	1
Slc13a4	NM_172892	243755	solute carrier family 13 (sodium/sulfate symporters), member 4	13.4784	9.21431	-4.26411	0.00327711	0.023092	0.159589	0.0684768	0.386911	0.370285
Tbrg4	NM_134011	21379	transforming growth factor beta regulated gene 4	-11.1357	1.70052	12.8362	0.00339818	0.466447	0.00120793	0.0692005	0.845095	0.103582
Noc3l	NM_021315	57753	nucleolar complex associated 3 homolog (S. cerevisiae)	-10.0861	2.96716	13.0533	0.00655559	0.226533	0.00108102	0.0855249	0.664611	0.103582
Nkap	NM_025937	67050	NFKB activating protein	-11.1187	1.72283	12.8416	0.00630629	0.49792	0.00257705	0.0844539	0.855589	0.10513
Tnf	NM_013693	21926	tumor necrosis factor	-11.974	0.765013	12.7391	0.00230516	0.74141	0.00146701	0.0595109	0.960728	0.103582
Gss	NM_008180	14854	glutathione synthetase	-13.3233	-2.24866	11.0746	0.000749464	0.335682	0.00307301	0.0405365	0.753711	0.10513
Tef	NM_153484	21685	thyrotroph embryonic factor	-8.21911	-0.778856	7.44025	0.00814777	0.72998	0.0133907	0.0936091	0.958294	0.12966
Xab2	NM_026156	67439	XPA binding protein 2	-8.66971	-1.11382	7.55589	0.00548329	0.617016	0.0114245	0.0809084	0.913996	0.125299
Rsc1a1	NM_023544	69994	regulatory solute carrier protein, family 1, member 1	-11.2456	1.59908	12.8447	0.0033012	0.494285	0.00125975	0.0685848	0.854164	0.103582
Chrnb1	NM_009601	11443	cholinergic receptor, nicotinic, beta polypeptide 1 (muscle)	-13.6428	-6.04679	7.59598	0.000648583	0.0303069	0.028466	0.0388378	0.393529	0.16435
0610009B22Rik	NM_025319	66050	RIKEN cDNA 0610009B22 gene	-10.5773	2.4479	13.0252	0.00845881	0.348579	0.00237678	0.0951346	0.765628	0.10513
Wdr83	NM_026399	67836	WD repeat domain containing 83	-12.1612	0.297253	12.4584	0.00383915	0.904923	0.00329622	0.071355	0.996283	0.105166
Gins2	NM_178856	272551	GINS complex subunit 2 (Psf2 homolog)	-12.8274	-0.645841	12.1816	0.0014734	0.781466	0.00214644	0.051004	0.968756	0.10513
Sf3a3	NM_029157	75062	splicing factor 3a, subunit 3	-13.2631	-1.72771	11.5354	0.0011957	0.470719	0.00324736	0.048354	0.84723	0.105166
Kif18b	NM_197959	70218	kinesin family member 18B	-12.5937	-0.339514	12.2542	0.00184281	0.884837	0.00223774	0.0549635	0.993214	0.10513
3110052M02Rik	NM_001166497	73229	RIKEN cDNA 3110052M02 gene	-9.53459	-3.48588	6.04872	0.00338568	0.154822	0.0324967	0.0692005	0.586805	0.173212
Mre11a	NM_018736	17535	meiotic recombination 11 homolog A (S. cerevisiae)	-12.9769	-1.2575	11.7194	0.0013854	0.594211	0.00287464	0.0500208	0.905413	0.10513
Cbara1	NA	NA	guanine nucleotide binding protein (G protein), gamma 4	-10.3945	2.55895	12.9535	0.00601822	0.296159	0.00133038	0.0832056	0.726795	0.103582
Krt24	NM_029393	75706	keratin 24	-13.7527	-13.7527	0	0.00182192	0.000931417	1	0.0547225	0.383054	1
Dera	NM_172733	232449	2-deoxyribose-5-phosphate aldolase homolog (C. elegans)	-9.94846	3.11322	13.0617	0.00722783	0.208336	0.00109782	0.0889085	0.659764	0.103582
A530088E08Rik	NR_029458	664702	RIKEN cDNA A530088E08 gene	-9.14248	-6.86363	2.27886	0.00903031	0.0297314	0.386483	0.0981961	0.393529	0.6029
Txnl4b	NM_175646	234723	thioredoxin-like 4B	-13.5673	-3.29073	10.2765	0.00103802	0.19752	0.00692293	0.0461801	0.646285	0.113575
Ccdc9	NM_172297	243846	coiled-coil domain containing 9	13.3359	10.6227	-2.71323	0.00185893	0.00766627	0.301398	0.0550041	0.383054	0.525673
Zfp251	NM_001007568	71591	zinc finger protein 251	-13.0757	-1.63519	11.4405	0.00126228	0.4912	0.00328547	0.0490176	0.852675	0.105166
Prpsap2	NM_144806	212627	phosphoribosyl pyrophosphate synthetase-associated protein 2	-13.6101	-3.34624	10.2639	0.000682743	0.174458	0.00542137	0.0389941	0.615996	0.11111
Rtel1	NR_030710	269400	regulator of telomere elongation helicase 1	-9.76881	-2.00931	7.75951	0.00380402	0.392256	0.0133106	0.071355	0.802773	0.129514
Btbd6	NM_201646	399566	BTB (POZ) domain containing 6	-11.857	0.670394	12.5274	0.00219781	0.769044	0.00146295	0.0585732	0.966486	0.103582
Stil	NM_009185	20460	Scl/Tal1 interrupting locus	13.7931	9.73636	-4.05676	0.000953164	0.00953471	0.128501	0.0437937	0.383054	0.332437
Lsr	NM_017405	54135	lipolysis stimulated lipoprotein receptor	-13.7038	-5.19077	8.51307	0.00109178	0.0665563	0.0205855	0.0470199	0.451212	0.147433
Cstf1	NM_024199	67337	cleavage stimulation factor, 3' pre-RNA, subunit 1	-11.3061	1.48204	12.7882	0.00570951	0.557043	0.00264422	0.0818	0.888836	0.10513
Tbcb	NM_025548	66411	tubulin folding cofactor B	-11.6673	0.995646	12.663	0.00238016	0.663091	0.00129421	0.0602737	0.935788	0.103582
Spnb1	NM_013675	20741	spectrin beta 1	-10.2042	2.49317	12.6974	0.009158	0.3313	0.00238653	0.0988319	0.750015	0.10513
Acp5	NM_007388	11433	acid phosphatase 5, tartrate resistant	-11.9454	0.665526	12.6109	0.00232458	0.773527	0.00156729	0.059763	0.967458	0.104648
2610019F03Rik	NM_173744	72148	RIKEN cDNA 2610019F03 gene	-13.0813	-1.46043	11.6209	0.00140807	0.541485	0.00324549	0.0500208	0.881216	0.105166
Spry2	NM_011897	24064	sprouty homolog 2 (Drosophila)	-13.2199	-1.99552	11.2243	0.000814228	0.3895	0.00283553	0.0425738	0.800566	0.10513
Dennd2a	NM_172477	209773	DENN/MADD domain containing 2A	-9.63262	-0.950882	8.68174	0.00398268	0.676089	0.00721265	0.072548	0.94132	0.114605
Mefv	NM_019453	54483	Mediterranean fever	-13.5659	-3.33279	10.2331	0.000942432	0.18839	0.00667106	0.0437937	0.635514	0.113188
Siglecg	NM_172900	243958	sialic acid binding Ig-like lectin G	-13.6735	-5.92398	7.74951	0.000673841	0.033801	0.0264483	0.0388838	0.399779	0.160122
Elof1	NM_170777	66126	elongation factor 1 homolog (ELF1, S. cerevisiae)	-13.2989	-2.02544	11.2734	0.000827577	0.385937	0.00289163	0.0428351	0.796859	0.10513
Serpinb1a	NM_025429	66222	serine (or cysteine) peptidase inhibitor, clade B, member 1a	-13.1551	-1.6927	11.4624	0.000874253	0.462457	0.00250298	0.0435064	0.842464	0.10513
Pskh1	NM_173432	244631	protein serine kinase H1	-11.2476	1.43997	12.6876	0.00367961	0.542214	0.00158093	0.0708516	0.881851	0.10513
Asb11	NM_026853	68854	ankyrin repeat and SOCS box-containing 11	13.4343	0	-13.4343	0.00185281	1	0.000971903	0.0550041	1	0.103582
Fdx1	NM_007996	14148	ferredoxin 1	9.90942	7.99453	-1.9149	0.00623275	0.0177702	0.44587	0.0839972	0.386911	0.662417
Mamdc2	NM_174857	71738	MAM domain containing 2	13.204	10.8848	-2.31926	0.00210695	0.0069678	0.372677	0.0578918	0.383054	0.592466
Itfg3	NM_207217	106581	integrin alpha FG-GAP repeat containing 3	-10.4007	2.37454	12.7752	0.00584116	0.327021	0.00142305	0.0823888	0.750015	0.103582
2310057M21Rik	NM_026655	68277	RIKEN cDNA 2310057M21 gene	-9.21782	-2.13587	7.08195	0.00558763	0.373463	0.0204294	0.0812834	0.784219	0.147324
Olfr1161	NM_146848	258845	olfactory receptor 1161	13.4204	0	-13.4204	0.00175041	1	0.000910289	0.0537042	1	0.103582
Ccl9	NM_011338	20308	chemokine (C-C motif) ligand 9	9.11963	6.91408	-2.20555	0.00506964	0.0202803	0.350387	0.0782262	0.386911	0.570967
Taf12	NM_025579	66464	TAF12 RNA polymerase II, TATA box binding protein (TBP)-associated factor	-12.9829	-1.40135	11.5815	0.00136541	0.553681	0.00308672	0.0500208	0.886937	0.10513
Fzd9	NM_010246	14371	frizzled homolog 9 (Drosophila)	13.3837	9.00134	-4.38233	0.00207562	0.0194748	0.127442	0.0578285	0.386911	0.330666
Pde6d	NM_008801	18582	phosphodiesterase 6D, cGMP-specific, rod, delta	-11.3132	1.37711	12.6903	0.00301768	0.551241	0.00130326	0.0657203	0.8859	0.103582
Cdc42ep1	NM_027219	104445	CDC42 effector protein (Rho GTPase binding) 1	-12.0936	0.397739	12.4913	0.00187071	0.861035	0.0014681	0.0551823	0.987185	0.103582
Abca14	NM_026458	67928	ATP-binding cassette, sub-family A (ABC1), member 14	13.4086	7.0598	-6.34882	0.00233796	0.0558376	0.0475844	0.0599408	0.435121	0.204176
Tmem107	NM_028336	66910	transmembrane protein 107	-13.6729	-6.35353	7.31939	0.00164304	0.0412937	0.0464765	0.0526739	0.411871	0.202416
Olfr592	NM_207556	404317	olfactory receptor 592	13.4143	0	-13.4143	0.0025464	1	0.00139145	0.062012	1	0.103582
Sel1l2	NM_001033296	228684	sel-1 suppressor of lin-12-like 2 (C. elegans)	-13.6751	-11.3056	2.3695	0.00201972	0.0037995	0.45566	0.0574121	0.383054	0.666812
Thumpd3	NM_008188	14911	THUMP domain containing 3	-12.7687	-0.843157	11.9255	0.00119034	0.710833	0.00199547	0.0483481	0.954925	0.10513
Rpap1	NM_177294	68925	RNA polymerase II associated protein 1	-9.79477	-1.30817	8.4866	0.00339905	0.565879	0.00777314	0.0692005	0.891082	0.115706
2310067B10Rik	NM_028014	71947	RIKEN cDNA 2310067B10 gene	-12.7622	-0.90486	11.8573	0.0012248	0.691779	0.00212691	0.0484071	0.948613	0.10513
Zfp808	NM_001039239	630579	zinc finger protein 80	-13.6504	-5.51489	8.13554	0.000881697	0.049284	0.023097	0.0435754	0.423787	0.153508
Ppif	NM_134084	105675	peptidylprolyl isomerase F (cyclophilin F)	-13.0763	-1.71038	11.3659	0.00235109	0.502223	0.00567269	0.0601545	0.85766	0.111349
Bcl2l12	NM_029410	75736	BCL2-like 12 (proline rich)	-13.6195	-4.73271	8.88678	0.0020423	0.107912	0.022228	0.0574382	0.521745	0.151801
Mgp	NM_008597	17313	matrix Gla protein	-13.1738	-1.6976	11.4762	0.00106736	0.470613	0.00294191	0.0466172	0.847211	0.10513
Them5	NM_025416	66198	thioesterase superfamily member 5	13.83	6.54394	-7.28611	0.00133824	0.0655894	0.0236325	0.0497547	0.45057	0.154787
1300014I06Rik	NM_025831	66895	RIKEN cDNA 1300014I06 gene	-13.1862	-1.6877	11.4985	0.00218324	0.506763	0.00521967	0.0585732	0.860301	0.111103
Slc39a11	NM_027216	69806	solute carrier family 39 (metal ion transporter), member 11	-13.136	-1.61752	11.5185	0.00118076	0.494249	0.00305779	0.0481108	0.854164	0.10513
Trpc1	NM_011643	22063	transient receptor potential cation channel, subfamily C, member 1	-13.1216	-1.85016	11.2714	0.000979692	0.428418	0.00303454	0.0447907	0.830354	0.10513
Olfr774	NM_207620	258232	olfactory receptor 774	-10.0774	-13.6487	-3.57129	0.0080159	0.0011036	0.194784	0.0930014	0.383054	0.415144
Fgf9	NM_013518	14180	fibroblast growth factor 9	13.5868	5.2122	-8.37457	0.000607185	0.113329	0.00662749	0.0377439	0.52775	0.112886
Tgm4	NM_177911	331046	transglutaminase 4 (prostate)	9.84607	8.0042	-1.84186	0.00760824	0.0200378	0.47222	0.0909272	0.386911	0.678777
Ecd	NM_027475	70601	ecdysoneless homolog (Drosophila)	-12.3652	-0.216903	12.1483	0.00159056	0.923882	0.00181412	0.0517964	0.999221	0.10513
Rint1	NM_177323	72772	RAD50 interactor 1	-8.65169	-2.38266	6.26903	0.0085341	0.329889	0.0356647	0.0954852	0.750015	0.180507
Atp2c2	NM_026922	69047	ATPase, Ca++ transporting, type 2C, member 2	9.98316	-3.39108	-13.3742	0.00704687	0.205579	0.00101299	0.0883811	0.655551	0.103582
Gm5115	NA	NA	NA	-13.416	-5.11671	8.29927	0.00358614	0.106325	0.0372101	0.0699223	0.518891	0.183949
Mrpl46	NM_023331	67308	mitochondrial ribosomal protein L46	-10.1067	2.6804	12.7871	0.00676748	0.272214	0.00135394	0.0869328	0.704313	0.103582
Gucy2c	NM_145067	14917	guanylate cyclase 2c	13.3641	7.85081	-5.51332	0.00271798	0.0395043	0.0779393	0.0630303	0.411185	0.256919
Slc19a3	NM_030556	80721	solute carrier family 19 (sodium/hydrogen exchanger), member 3	-13.3639	-4.13887	9.22504	0.00387326	0.173913	0.0249445	0.0717519	0.615213	0.15641
5330426P16Rik	NR_028300	68190	RIKEN cDNA 5330426P16 gene	-11.845	0.536773	12.3818	0.0031919	0.821818	0.00236489	0.0678672	0.979226	0.10513
Rps23	NM_024175	66475	ribosomal protein S23	-13.063	-1.8049	11.2581	0.00254474	0.483892	0.0063561	0.062012	0.850195	0.112886
Mvk	NM_023556	17855	mevalonate kinase	-9.81909	-1.68215	8.13694	0.00827959	0.513066	0.0197654	0.0943436	0.864439	0.146022
Zbtb39	NM_198035	320080	zinc finger and BTB domain containing 39	-12.3484	-0.270413	12.078	0.00286149	0.911312	0.00330749	0.0641486	0.997468	0.105166
Gm15450	NA	NA	NA	-13.063	-1.83674	11.2263	0.00257016	0.477176	0.00651163	0.0620518	0.850195	0.112886
Pgm3	NM_028352	109785	phosphoglucomutase 3	-8.93494	-0.436768	8.49817	0.00680255	0.848478	0.00889375	0.0871747	0.984548	0.118263
AI662270	NR_015519	100043636	expressed sequence AI662270	-11.9762	0.467403	12.4436	0.0022224	0.838982	0.00168203	0.0586577	0.982104	0.10513
Rab3b	NM_023537	69908	RAB3B, member RAS oncogene family	-12.8016	-0.933401	11.8682	0.001549	0.690897	0.00265984	0.0514825	0.948339	0.10513
4930422G04Rik	NM_197997	71643	RIKEN cDNA 4930422G04 gene	-12.7149	-0.891215	11.8237	0.00292475	0.722463	0.00461104	0.0647071	0.95679	0.108858
Pdlim4	NM_019417	30794	PDZ and LIM domain 4	-13.3186	-2.86512	10.4535	0.000787595	0.233419	0.00469924	0.0414146	0.670216	0.108954
Klhl33	NM_001166651	546611	kelch-like 33 (Drosophila)	13.3564	0	-13.3564	0.00267772	1	0.00146728	0.0628366	1	0.103582
Tiprl	NM_145513	226591	TIP41, TOR signalling pathway regulator-like (S. cerevisiae)	-11.5389	0.978977	12.5179	0.00272244	0.670423	0.00150613	0.0630303	0.938619	0.103582
C030034I22Rik	NR_026848	77533	RIKEN cDNA C030034I22 gene	-13.3977	-4.92513	8.47254	0.00118044	0.0750201	0.0201663	0.0481108	0.467841	0.146787
Mett11d1	NA	NA	NA	-13.1043	-2.02569	11.0787	0.00100574	0.389466	0.00345847	0.0456443	0.800566	0.105471
Cdc42ep2	NM_026772	104252	CDC42 effector protein (Rho GTPase binding) 2	-11.9979	0.455425	12.4533	0.00210833	0.842322	0.00160314	0.0578918	0.983175	0.10513
Asb1	NM_023046	65247	ankyrin repeat and SOCS box-containing 1	-9.14967	-0.240734	8.90894	0.00766811	0.918829	0.00880422	0.0912407	0.998425	0.118263
Mafk	NM_010757	17135	v-maf musculoaponeurotic fibrosarcoma oncogene family, protein K (avian)	-11.3329	1.21228	12.5452	0.00605567	0.632258	0.00326406	0.0833073	0.921277	0.105166
Wdr59	NM_176923	319481	WD repeat domain 59	-12.6358	-0.649258	11.9865	0.00139713	0.776499	0.0020669	0.0500208	0.967458	0.10513
AW555464	NM_001024602	217882	expressed sequence AW555464	-13.2769	-2.49887	10.778	0.00116998	0.309307	0.00500108	0.0481108	0.739518	0.109949
Ggt5	NM_011820	23887	gamma-glutamyltransferase 5	13.7678	6.90866	-6.85918	0.0022859	0.0632175	0.03983	0.0593439	0.44431	0.18894
Ovca2	NM_027136	246257	candidate tumor suppressor in ovarian cancer 2	-10.9661	1.74247	12.7085	0.00498308	0.473207	0.00185679	0.0778934	0.848197	0.10513
Farp2	NM_145519	227377	FERM, RhoGEF and pleckstrin domain protein 2	-10.0376	-2.1641	7.87353	0.00338548	0.362687	0.0128032	0.0692005	0.779369	0.128879
Phax	NM_019996	56698	phosphorylated adaptor for RNA export	-12.7043	-0.833526	11.8707	0.00131384	0.715654	0.00217678	0.0497547	0.95515	0.10513
Hprt	NM_013556	15452	hypoxanthine guanine phosphoribosyl transferase	-11.6337	0.87961	12.5133	0.00249164	0.700606	0.00145838	0.0615686	0.950309	0.103582
Hnrnph2	NM_019868	56258	heterogeneous nuclear ribonucleoprotein H2	-10.8824	1.75336	12.6358	0.00487022	0.46615	0.00176898	0.077387	0.844905	0.10513
Mon1a	NM_028369	72825	MON1 homolog A (yeast)	-12.7332	-0.891499	11.8417	0.00147331	0.701134	0.00249295	0.051004	0.950309	0.10513
C030002C11Rik	NA	NA	NA	-13.2503	-2.52457	10.7257	0.00138481	0.312523	0.00575562	0.0500208	0.742264	0.111349
Psen2	NM_011183	19165	presenilin 2	-12.0819	0.115936	12.1978	0.0020811	0.959708	0.00194126	0.0578285	1	0.10513
2610109H07Rik	NM_027426	70433	RIKEN cDNA 2610109H07 gene	-13.0832	-2.16751	10.9157	0.00157425	0.381252	0.00530346	0.051546	0.791323	0.11111
Igsf3	NM_207205	78908	immunoglobulin superfamily, member 3	-13.0993	-2.11503	10.9842	0.00101648	0.370761	0.00368591	0.0458414	0.784219	0.106093
Smpd2	NM_009213	20598	sphingomyelin phosphodiesterase 2, neutral	13.0601	10.8855	-2.17458	0.00237492	0.00721354	0.403244	0.0602737	0.383054	0.619661
Slc6a15	NM_175328	103098	solute carrier family 6 (neurotransmitter transporter), member 15	13.2993	8.67557	-4.62371	0.00215652	0.0230061	0.111687	0.0584371	0.386911	0.308823
Id1	NM_010495	15901	inhibitor of DNA binding 1	-12.7357	-0.914968	11.8207	0.00152571	0.694928	0.00260754	0.0513107	0.949604	0.10513
Gramd4	NM_172611	223752	GRAM domain containing 4	-10.8033	1.70577	12.509	0.00531629	0.480336	0.002005	0.0798389	0.850195	0.10513
4732416N19Rik	NR_015615	320737	RIKEN cDNA 4732416N19 gene	-13.3574	-7.46278	5.89462	0.00330078	0.0321041	0.110004	0.0685848	0.398379	0.306546
Ssh1	NM_198109	231637	slingshot homolog 1 (Drosophila)	-11.1492	1.34099	12.4902	0.0069463	0.600046	0.0035328	0.0878918	0.908265	0.105473
Chodl	NM_139134	246048	chondrolectin	13.294	0	-13.294	0.00279903	1	0.00153637	0.063586	1	0.103662
Msl3l2	NM_001163833	73390	male-specific lethal 3-like 2 (Drosophila)	-13.2385	-3.16616	10.0724	0.00135605	0.216262	0.00820747	0.0499424	0.663405	0.117345
E530001F21Rik	NR_002167	279610	RIKEN cDNA E530001F21 gene	13.2918	0	-13.2918	0.0028074	1	0.00154135	0.063586	1	0.103662
Zfp93	NM_009567	22755	zinc finger protein 93	-12.9871	-1.92337	11.0637	0.00188113	0.439611	0.00537672	0.0553368	0.836053	0.11111
Gadd45b	NM_008655	17873	growth arrest and DNA-damage-inducible 45 beta	-12.1426	-0.0334154	12.1092	0.00200552	0.988379	0.00204512	0.0571488	1	0.10513
9930032O22Rik	NA	NA	NA	13.4743	9.56417	-3.91011	0.000926111	0.0093384	0.132041	0.0436537	0.383054	0.337457
Amt	NM_001013814	434437	aminomethyltransferase	-13.5426	-6.81668	6.72594	0.00128706	0.0267668	0.058109	0.0493602	0.392646	0.222015
Sumo3	NM_019929	20610	SMT3 suppressor of mif two 3 homolog 3 (yeast)	-12.2126	-0.0701962	12.1424	0.00235501	0.976159	0.00245051	0.0601545	1	0.10513
9130014G24Rik	NM_001127353	215772	RIKEN cDNA 9130014G24 gene	-13.4341	-3.48196	9.95212	0.00140673	0.186696	0.00963406	0.0500208	0.634348	0.119786
Opa3	NM_207525	403187	optic atrophy 3 (human)	-12.473	-0.488728	11.9843	0.00150108	0.830007	0.00201905	0.0510337	0.980736	0.10513
Ano1	NM_178642	101772	anoctamin 1, calcium activated chloride channel	-12.9507	-1.48698	11.4637	0.00117801	0.523453	0.00288182	0.0481108	0.870534	0.10513
Gpr160	NM_027965	71862	G protein-coupled receptor 160	-13.1954	-2.17734	11.018	0.00226331	0.401587	0.00691409	0.0591078	0.810157	0.113575
Lsm4	NM_015816	50783	LSM4 homolog, U6 small nuclear RNA associated (S. cerevisiae)	-12.0971	0.0916505	12.1887	0.00218701	0.968359	0.00207124	0.0585732	1	0.10513
Tbx21	NM_019507	57765	T-box 21	13.2641	4.42472	-8.83938	0.00168267	0.190471	0.00973145	0.0528488	0.635514	0.119944
AA467197	NM_001004174	433470	expressed sequence AA467197	-11.2534	1.29666	12.5501	0.0037994	0.583539	0.00178679	0.071355	0.901812	0.10513
Pus10	NM_028956	74467	pseudouridylate synthase 10	-12.2077	-0.0336092	12.1741	0.00392574	0.98928	0.00399242	0.0721742	1	0.106783
Sdr9c7	NM_027301	70061	4short chain dehydrogenase/reductase family 9C, member 7	13.2253	8.70346	-4.52187	0.00405787	0.0308862	0.145744	0.0733952	0.393756	0.35419
Opn1mw	NM_008106	14539	opsin 1 (cone pigments), medium-wave-sensitive (color blindness, deutan)	-13.3244	-13.3244	0	0.00289494	0.00153121	1	0.0644893	0.383054	1
Taz	NM_181516	66826	tafazzin	-11.3977	1.0387	12.4364	0.00593429	0.681231	0.00350059	0.0830084	0.94375	0.105473
Hephl1	NM_001164797	244698	hephaestin-like 1	9.83726	5.67753	-4.15973	0.00638805	0.0642933	0.131337	0.0848175	0.446628	0.33661
Zfp687	NM_030074	78266	zinc finger protein 687	-11.5309	0.9772	12.5081	0.00542406	0.697919	0.00329303	0.0808036	0.950309	0.105166
Olfr420	NM_146305	258302	olfactory receptor 420	13.2547	0	-13.2547	0.00213214	1	0.00112506	0.0581156	1	0.103582
Uts2d	NM_198166	224065	urotensin 2 domain containing	-13.4964	-5.48834	8.00811	0.00336811	0.0877646	0.042127	0.069158	0.494262	0.194071
Umps	NM_009471	22247	uridine monophosphate synthetase	8.85916	8.63343	-0.225734	0.00682738	0.00784752	0.920927	0.0871747	0.383054	0.982949
9630025I21Rik	NA	NA	NA	13.2254	8.7506	-4.47475	0.00227956	0.0223418	0.121845	0.0592621	0.386911	0.322915
Ilf2	NM_026374	67781	interleukin enhancer binding factor 2	-10.3447	2.38595	12.7306	0.00600721	0.324537	0.00144961	0.0831568	0.750015	0.103582
Cpne8	NM_025815	66871	copine VIII	8.3819	6.30989	-2.07201	0.00821844	0.0299334	0.381531	0.0941671	0.393529	0.59819
Atp13a5	NM_175650	268878	ATPase type 13A5	10.0318	3.64999	-6.3818	0.00793125	0.214569	0.0458905	0.0926494	0.661271	0.201189
Gstt1	NM_008185	14871	glutathione S-transferase, theta 1	13.2371	7.42724	-5.8099	0.00168108	0.0396455	0.0513864	0.0528488	0.411577	0.210234
Pilrb2	NM_001024932	545812	paired immunoglobin-like type 2 receptor beta 2	-13.2918	-5.22309	8.06872	0.00267739	0.0869722	0.0354387	0.0628366	0.494121	0.180026
Dtx2	NM_023742	74198	deltex 2 homolog (Drosophila)	-11.0504	1.28933	12.3398	0.00859971	0.622625	0.00462226	0.0959302	0.916654	0.108858
Sms	NM_009214	20603	spermine synthase	-11.7693	0.477687	12.2469	0.00270974	0.836988	0.00204697	0.0630303	0.98189	0.10513
Nxn	NM_008750	18230	nucleoredoxin	-13.4294	-4.30588	9.12356	0.0022246	0.135079	0.0195932	0.0586577	0.563048	0.145827
Alkbh8	NM_026303	67667	alkB, alkylation repair homolog 8 (E. coli)	-9.81543	2.97315	12.7886	0.00822502	0.23041	0.00139244	0.0941843	0.665041	0.103582
Icam2	NM_010494	15896	intercellular adhesion molecule 2	-13.3226	-3.41503	9.90752	0.00160288	0.197342	0.0103202	0.0520152	0.645928	0.122092
E130309D02Rik	NM_172726	231868	RIKEN cDNA E130309D02 gene	-10.4828	2.01095	12.4938	0.00757525	0.422212	0.00253126	0.0908405	0.82728	0.10513
Olfr105	NA	NA	NA	-13.2884	-7.94959	5.33879	0.00346126	0.0258301	0.142837	0.0692265	0.392646	0.350522
Mlkl	NM_029005	74568	mixed lineage kinase domain-like	-11.8426	0.511301	12.3539	0.00249698	0.824948	0.001845	0.0615686	0.980165	0.10513
Zbtb46	NM_028125	72147	zinc finger and BTB domain containing 46	-11.3807	1.05283	12.4336	0.00588385	0.676467	0.00343735	0.0827394	0.941494	0.105471
Rin1	NM_145495	225870	Ras and Rab interactor 1	-13.2838	-9.89435	3.38947	0.00303905	0.00907154	0.315476	0.0660548	0.383054	0.539711
4833420G17Rik	NM_026127	67392	RIKEN cDNA 4833420G17 gene	-11.6103	0.797511	12.4078	0.00277579	0.730037	0.00172525	0.063208	0.958294	0.10513
Greb1l	NM_001083628	381157	growth regulation by estrogen in breast cancer-like	-11.4062	0.808599	12.2148	0.00737768	0.755981	0.00500985	0.0895648	0.96488	0.109949
Slc27a4	NM_011989	26569	solute carrier family 27 (fatty acid transporter), member 4	-11.8847	0.230944	12.1156	0.00271857	0.921303	0.00237836	0.0630303	0.99867	0.10513
Xylb	NM_001199568	102448	xylulokinase homolog (H. influenzae)	-13.3848	-3.45929	9.92548	0.00206613	0.206643	0.0122327	0.0578285	0.657588	0.127154
Pdgfb	NM_011057	18591	platelet derived growth factor, B polypeptide	12.9662	11.4333	-1.53297	0.00274406	0.00589802	0.552084	0.0631952	0.383054	0.741679
Gm7276	NA	NA	NA	-13.3115	-5.29079	8.0207	0.000935312	0.0531765	0.0233269	0.0437937	0.42692	0.153871
Psmd5	NM_080554	66998	proteasome (prosome, macropain) 26S subunit, non-ATPase, 5	-11.4389	0.99004	12.4289	0.00296846	0.668024	0.00163644	0.065017	0.937395	0.10513
Ptgr1	NM_025968	67103	prostaglandin reductase 1	8.49268	3.70182	-4.79086	0.0075593	0.151599	0.0727739	0.0908192	0.583303	0.248086
Frem1	NM_177863	329872	Fras1 related extracellular matrix protein 1	9.73171	6.01137	-3.72034	0.00530928	0.0469453	0.15566	0.0798389	0.423217	0.365514
Bambi	NM_026505	68010	BMP and activin membrane-bound inhibitor, homolog (Xenopus laevis)	-12.9024	-1.80295	11.0995	0.00276628	0.484464	0.00690612	0.063208	0.850195	0.113575
Nudt16l1	NM_025839	66911	nudix (nucleoside diphosphate linked moiety X)-type motif 16-like 1	-12.8923	-1.81104	11.0813	0.0020988	0.468109	0.0055758	0.0578918	0.846522	0.111349
Sox18	NM_009236	20672	SRY-box containing gene 18	-13.1408	-3.45813	9.68271	0.00314106	0.222845	0.0166781	0.0673214	0.664611	0.13839
Ppp1r11	NM_029632	76497	protein phosphatase 1, regulatory (inhibitor) subunit 11	-12.9388	-2.00541	10.9334	0.00183278	0.418928	0.00554847	0.0549598	0.825318	0.111349
Acss1	NM_080575	68738	acyl-CoA synthetase short-chain family member 1	-10.7479	1.85828	12.6062	0.00515556	0.440044	0.00175069	0.078692	0.836053	0.10513
Psmb10	NM_013640	19171	proteasome (prosome, macropain) subunit, beta type 10	-12.8738	-1.45019	11.4236	0.00162924	0.545427	0.0037197	0.0524124	0.883321	0.106093
Galm	NM_176963	319625	galactose mutarotase	-11.4205	0.890771	12.3113	0.00634486	0.72692	0.00407171	0.0847224	0.957244	0.107021
Spz1	NM_030237	79401	spermatogenic leucine zipper 1	13.6077	6.33825	-7.26942	0.00265342	0.0848606	0.0338547	0.0626806	0.489021	0.176768
Msl3	NM_010832	17692	male-specific lethal 3 homolog (Drosophila)	-10.3838	2.22115	12.6049	0.0057851	0.355073	0.00153163	0.0819783	0.771403	0.103662
Cdh8	NM_007667	12564	cadherin 8	13.6077	3.80041	-9.80725	0.00236659	0.264027	0.0091235	0.0601763	0.700311	0.118878
Blk	NM_007549	12143	B lymphoid kinase	-13.3136	-3.23631	10.0773	0.00222206	0.23468	0.0115758	0.0586577	0.671932	0.126171
Nsg2	NM_008741	18197	neuron specific gene family member 2	-12.6489	-1.18311	11.4658	0.00315415	0.640951	0.00574473	0.0674508	0.925719	0.111349
Nrsn2	NM_001009948	228777	neurensin 2	-13.3767	-4.53071	8.84598	0.00208107	0.115864	0.0215233	0.0578285	0.532843	0.14998
Prkab1	NM_031869	19079	protein kinase, AMP-activated, beta 1 non-catalytic subunit	-10.9302	1.53261	12.4628	0.0045861	0.519591	0.00187675	0.0754369	0.86902	0.10513
Kcnk13	NM_146037	217826	potassium channel, subfamily K, member 13	-8.33903	-0.667222	7.6718	0.00887965	0.770901	0.0134078	0.0971267	0.966728	0.129758
3110001D03Rik	NM_025849	66928	RIKEN cDNA 3110001D03 gene	-12.0923	-0.0560301	12.0363	0.0041932	0.982147	0.0043129	0.0736205	1	0.108049
Lcor	NM_172154	212391	ligand dependent nuclear receptor corepressor	-9.09598	-0.302124	8.79385	0.00626291	0.895128	0.00752549	0.0839972	0.995128	0.11461
Gm7455	NA	NA	NA	-10.0778	-3.32505	6.7528	0.00596506	0.213562	0.0364493	0.0830991	0.659907	0.182168
Rab35	NM_198163	77407	RAB35, member RAS oncogene family	-12.861	-1.54585	11.3152	0.0012804	0.509159	0.00323002	0.0493179	0.861986	0.105166
Scrib	NM_134089	105782	scribbled homolog (Drosophila)	-9.10776	-2.71121	6.39655	0.0060201	0.269679	0.0312995	0.0832056	0.701051	0.170376
Fgf5	NM_010203	14176	fibroblast growth factor 5	13.1556	6.99607	-6.15957	0.00299892	0.0601869	0.056102	0.0654893	0.440016	0.217859
Ctf1	NM_007795	13019	cardiotrophin 1	-13.412	-6.55777	6.85423	0.00226513	0.0410723	0.0629742	0.0591078	0.411871	0.231975
Nkx6-2	NR_027857	14912	NK6 homeobox 2	-12.5099	-0.808411	11.7015	0.00150257	0.724247	0.0024491	0.0510337	0.957011	0.10513
Lyve1	NM_053247	114332	lymphatic vessel endothelial hyaluronan receptor 1	-13.4138	-8.24216	5.17168	0.00321951	0.0222303	0.153537	0.068142	0.386911	0.363486
Hspa12b	NM_028306	72630	heat shock protein 12B	-13.3234	-3.53173	9.79169	0.00224437	0.20142	0.013541	0.0589488	0.649265	0.130165
Sun1	NM_024451	77053	Sad1 and UNC84 domain containing 1	-12.9637	-2.34991	10.6138	0.00277792	0.373297	0.0090869	0.063208	0.784219	0.118767
Bend4	NM_001164806	666938	BEN domain containing 4	-11.9518	0.183168	12.135	0.00283514	0.938143	0.00255521	0.0638663	1	0.10513
Ppme1	NM_028292	72590	protein phosphatase methylesterase 1	-12.0061	0.11542	12.1215	0.00211264	0.959748	0.00197041	0.0579244	1	0.10513
Pcdhb16	NM_053141	93887	protocadherin beta 16	-10.8734	1.55603	12.4295	0.00440127	0.509114	0.00174526	0.0743007	0.861986	0.10513
Med26	NM_027485	70625	mediator complex subunit 26	-13.105	-3.19557	9.90946	0.0025145	0.240777	0.012775	0.0618201	0.680354	0.128879
4931414P19Rik	NM_028890	74359	RIKEN cDNA 4931414P19 gene	-10.7161	1.53965	12.2558	0.00719757	0.537701	0.00316527	0.0889085	0.878747	0.105166
Rbm43	NM_030243	71684	RNA binding motif protein 43	-11.658	0.642746	12.3008	0.00324708	0.785364	0.0022492	0.0682139	0.96948	0.10513
Eif2ak3	NM_010121	13666	eukaryotic translation initiation factor 2 alpha kinase 3	-8.35941	-0.76992	7.58949	0.00865128	0.736763	0.0139435	0.0961195	0.958979	0.131373
Shfm1	NM_009169	20422	split hand/foot malformation (ectrodactyly) type 1	-11.669	0.552454	12.2214	0.00262163	0.809958	0.00188232	0.0623674	0.975563	0.10513
Alox15	NM_009660	11687	arachidonate 15-lipoxygenase	10.9882	12.4907	1.5025	0.00732672	0.00344424	0.559306	0.0892379	0.383054	0.748187
Hebp1	NM_013546	15199	heme binding protein 1	-11.5364	0.655674	12.1921	0.00333674	0.780028	0.0022847	0.0690486	0.968227	0.10513
Iqch	NM_030068	78250	IQ motif containing H	13.1124	8.48337	-4.62904	0.00184742	0.0224914	0.101521	0.0549635	0.386911	0.294972
N28178	NM_172690	230085	expressed sequence N28178	-11.4598	0.757388	12.2172	0.00838863	0.776001	0.00592932	0.0950029	0.967458	0.111889
Wdr74	NM_134139	107071	WD repeat domain 74	-12.6579	-1.20026	11.4577	0.00165872	0.610483	0.00333536	0.0528488	0.911942	0.105166
Cyp27b1	NM_010009	13115	cytochrome P450, family 27, subfamily b, polypeptide 1	-13.1733	-6.84045	6.33286	0.00253017	0.0352087	0.081617	0.0619333	0.399779	0.263059
Snrpn	NM_013670	20646	small nuclear ribonucleoprotein N	-9.44567	-2.36776	7.07791	0.00521745	0.326459	0.0221284	0.0791229	0.750015	0.151635
Fscn2	NM_172802	238021	fascin homolog 2, actin-bundling protein, retinal (Strongylocentrotus purpuratus)	-13.1708	-13.1708	0	0.00323435	0.00171911	0.999716	0.0682139	0.383054	1
Mrpl40	NM_010922	18100	mitochondrial ribosomal protein L40	-13.152	-2.94185	10.2102	0.0012833	0.24088	0.00707568	0.0493179	0.680354	0.114054
Rnls	NM_001167818	67795	renalase, FAD-dependent amine oxidase	12.6101	11.3146	-1.29551	0.00313117	0.00602566	0.611126	0.0672732	0.383054	0.787251
Txnrd2	NM_013711	26462	thioredoxin reductase 2	-13.1387	-3.30908	9.82958	0.000991824	0.182243	0.00749563	0.0451531	0.627838	0.11461
Adamts13	NM_001001322	279028	a disintegrin-like and metallopeptidase (reprolysin type) with thrombospondin type 1 motif, 13	-13.1522	-5.44658	7.70557	0.00429435	0.0932224	0.0503688	0.0740815	0.503168	0.208962
Gem	NM_010276	14579	GTP binding protein (gene overexpressed in skeletal muscle)	-8.3111	-2.36858	5.94252	0.00910368	0.326101	0.0392066	0.0985219	0.750015	0.187807
Blcap	NM_016916	53619	bladder cancer associated protein homolog (human)	-11.0721	1.24982	12.3219	0.00393536	0.593316	0.0018746	0.072182	0.905413	0.10513
Stard3nl	NM_024270	76205	STARD3 N-terminal like	-8.81775	0.00141536	8.81916	0.00726324	0.999505	0.00725416	0.0889252	1	0.114605
4932411E22Rik	NM_172534	214604	RIKEN cDNA 4932411E22 gene	-13.3455	-5.58005	7.7655	0.00384414	0.0864577	0.0484837	0.071355	0.492883	0.205924
Scarf2	NM_153790	224024	scavenger receptor class F, member 2	13.0995	0	-13.0995	0.00326638	1	0.00180673	0.0683545	1	0.10513
AW011738	NR_030671	100382	expressed sequence AW011738	-9.99062	-6.60951	3.38111	0.00354663	0.0235392	0.207433	0.0698603	0.386911	0.430979
Gna15	NM_010304	14676	guanine nucleotide binding protein, alpha 15	12.2621	11.7732	-0.488886	0.00382004	0.00488267	0.846209	0.071355	0.383054	0.941459
Trabd	NM_026485	67976	TraB domain containing	-9.62991	-1.99897	7.63094	0.00573477	0.413548	0.0182687	0.0818837	0.820878	0.142994
Lef1	NM_010703	16842	lymphoid enhancer binding factor 1	-12.9406	-2.6516	10.289	0.00304968	0.325638	0.0113583	0.066198	0.750015	0.124997
4932411G14Rik	NA	NA	NA	13.0971	0	-13.0971	0.0032796	1	0.00181474	0.0684768	1	0.10513
Bcl7b	NM_009745	12054	B-cell CLL/lymphoma 7B	-11.7808	0.361541	12.1423	0.0037101	0.88101	0.00304675	0.0709489	0.991967	0.10513
Taf8	NM_022015	63856	TAF8 RNA polymerase II, TATA box binding protein (TBP)-associated factorq	-12.5589	-1.04081	11.518	0.00147567	0.651438	0.00276507	0.051004	0.931515	0.10513
Smcr7l	NM_178719	239555	Smith-Magenis syndrome chromosome region, candidate 7-like (human)	-12.8031	-1.84126	10.9618	0.00124874	0.432882	0.00381413	0.0486955	0.835037	0.106221
Pdzk1	NM_021517	59020	PDZ domain containing 1	-11.6133	0.482528	12.0959	0.00567112	0.848783	0.00445504	0.0815816	0.984552	0.108049
Parl	NM_001005767	381038	presenilin associated, rhomboid-like	-11.8306	0.241399	12.072	0.00240329	0.916206	0.00207953	0.0606937	0.998425	0.10513
2810459M11Rik	NM_001144993	72792	RIKEN cDNA 2810459M11 gene	10.9724	12.3011	1.32868	0.00738858	0.00378824	0.60401	0.0895799	0.383054	0.782165
Snurf	NM_033174	84704	SNRPN upstream reading frame	-12.972	-2.36415	10.6079	0.00125373	0.328172	0.00511299	0.0487877	0.750015	0.110683
Prrg1	NM_027322	546336	proline rich Gla (G-carboxyglutamic acid) 1	-12.51	-1.11918	11.3908	0.00159711	0.629526	0.00311721	0.0519188	0.920296	0.105166
Mapk7	NM_011841	23939	mitogen-activated protein kinase 7	-12.8338	-1.78423	11.0495	0.00126884	0.448106	0.00371547	0.0490671	0.836053	0.106093
Gba2	NM_172692	230101	glucosidase beta 2	-12.0608	-0.0470245	12.0138	0.00245257	0.98394	0.00251888	0.061286	1	0.10513
Cacna1f	NM_019582	54652	calcium channel, voltage-dependent, alpha 1F subunit	12.8153	10.3949	-2.42037	0.00358314	0.0114524	0.373488	0.0699223	0.383054	0.59319
Esr2	NM_207707	13983	estrogen receptor 2 (beta)	13.0675	8.49957	-4.56798	0.00316784	0.0288325	0.126923	0.0675878	0.393529	0.330427
Zfp235	NM_019941	56525	zinc finger protein 235	13.2392	10.4177	-2.8215	0.0023792	0.00979265	0.295461	0.0602737	0.383054	0.518958
Tnk1	NM_031880	83813	tyrosine kinase, non-receptor, 1	13.181	10.6455	-2.53547	0.00128169	0.00546898	0.30709	0.0493179	0.383054	0.53199
Gnb5	NM_138719	14697	guanine nucleotide binding protein (G protein), beta 5	-11.3646	0.819674	12.1843	0.00496206	0.737923	0.00319828	0.0778088	0.959331	0.105166
Tgm5	NM_028799	74176	transglutaminase 5	-13.0548	-2.71849	10.3363	0.00310274	0.319204	0.0116764	0.0668133	0.748301	0.126525
Cyp2c65	NM_028191	72303	cytochrome P450, family 2, subfamily c, polypeptide 65	13.4836	4.76519	-8.71843	0.00289754	0.177421	0.0172586	0.0644893	0.621726	0.14026
L1td1	NM_001081202	381591	LINE-1 type transposase domain containing 1	-13.021	-3.79598	9.22507	0.00503593	0.211693	0.0266248	0.0782262	0.659764	0.160724
D9Ertd402e	NM_001013405	382117	DNA segment, Chr 9, ERATO Doi 402, expressed	-12.3909	-0.84607	11.5449	0.00372955	0.738304	0.0057058	0.0709933	0.95949	0.111349
Ubxn6	NM_024432	66530	UBX domain protein 6	-11.4929	0.636532	12.1294	0.0046811	0.794747	0.00333144	0.0762758	0.971909	0.105166
Cacna1i	NM_001044308	239556	calcium channel, voltage-dependent, alpha 1I subunit	9.27062	5.04655	-4.22407	0.00881026	0.089042	0.130848	0.0969389	0.497675	0.335602
Irf2bp1	NM_178757	272359	interferon regulatory factor 2 binding protein 1	-13.1385	-2.9842	10.1543	0.00133155	0.23643	0.0074525	0.0497547	0.673299	0.11461
Sohlh1	NM_001001714	227631	spermatogenesis and oogenesis specific basic helix-loop-helix 1	13.4538	0	-13.4538	0.00131176	1	0.000657791	0.0497547	1	0.103582
Timm8b	NM_013897	30057	translocase of inner mitochondrial membrane 8 homolog b (yeast)	-12.1177	-0.205002	11.9127	0.00213774	0.929238	0.00241172	0.058183	0.999868	0.10513
Snx11	NM_028965	74479	sorting nexin 11	-12.9512	-2.66348	10.2877	0.00141121	0.281619	0.0066643	0.0500208	0.711826	0.113177
Nxph1	NM_008751	18231	neurexophilin 1	12.2224	11.565	-0.657362	0.00411375	0.00569935	0.796034	0.0736205	0.383054	0.913508
2700029M09Rik	NM_028299	72612	RIKEN cDNA 2700029M09 gene	-12.4055	-0.835811	11.5696	0.00169488	0.717147	0.00279294	0.0528695	0.95515	0.10513
Ccdc54	NM_027046	69339	coiled-coil domain containing 54	13.4687	0	-13.4687	0.00262412	1	0.00144478	0.0623674	1	0.103582
Mlf1ip	NM_027973	71876	myeloid leukemia factor 1 interacting protein	-10.5959	1.87601	12.4719	0.00670288	0.447863	0.00236819	0.0865824	0.836053	0.10513
Tcte1	NM_013688	21645	t-complex-associated testis expressed 1	-13.1552	-3.19069	9.96451	0.00132127	0.209751	0.00833492	0.0497547	0.659764	0.117345
Slc35a2	NM_078484	22232	solute carrier family 35 (UDP-galactose transporter), member A2	-12.8307	-2.28161	10.5491	0.00150665	0.348997	0.00569909	0.0510337	0.766128	0.111349
Snrk	NM_133741	20623	SNF related kinase	-12.0453	-0.154026	11.8913	0.00229963	0.946983	0.00251586	0.0595109	1	0.10513
Asf1a	NM_025541	66403	ASF1 anti-silencing function 1 homolog A (S. cerevisiae)	-11.5193	0.660186	12.1795	0.00581486	0.793964	0.00417193	0.0822006	0.971909	0.107526
Tmem115	NM_019704	56395	transmembrane protein 115	13.1217	10.4098	-2.71196	0.00119403	0.0058285	0.272877	0.048354	0.383054	0.495162
Ficd	NM_001010825	231630	FIC domain containing	-13.0721	-2.94601	10.1261	0.00158222	0.248534	0.00828679	0.0516156	0.684578	0.117345
Cog2	NM_029746	76332	component of oligomeric golgi complex 2	-10.9579	1.43623	12.3941	0.00788591	0.577168	0.00384229	0.0924688	0.897832	0.106221
Cd55	NM_010016	13136	CD55 antigen	-13.2596	-5.33202	7.9276	0.0013358	0.0600047	0.0282331	0.0497547	0.440016	0.163917
Eid3	NM_025499	66341	EP300 interacting inhibitor of differentiation 3	-13.2738	-5.54908	7.72476	0.00241814	0.0697921	0.0402926	0.0609857	0.455045	0.190212
Cxcl11	NR_038116	56066	chemokine (C-X-C motif) ligand 11	-13.2431	-13.2431	0	0.00142439	0.000674879	0.999423	0.0502325	0.383054	1
Cst8	NM_009978	13012	cystatin 8 (cystatin-related epididymal spermatogenic)	13.4398	0	-13.4398	0.00267458	1	0.00147345	0.0628366	1	0.103582
AI314976	NM_207219	106821	expressed sequence AI314976	-12.5402	-1.22957	11.3106	0.00184771	0.603645	0.00375924	0.0549635	0.909559	0.106093
Cd4	NM_013488	12504	CD4 antigen	-9.14025	-4.4286	4.71165	0.00826991	0.110202	0.101566	0.0942912	0.524838	0.294972
Tmem128	NM_025480	66309	transmembrane protein 128	-12.3471	-0.681018	11.6661	0.00205935	0.771414	0.00305159	0.0577426	0.967042	0.10513
Olfr1509	NM_020514	57271	olfactory receptor 1509	-13.0576	-13.0576	0	0.00356353	0.00190533	0.999771	0.0698729	0.383054	1
Ikzf5	NM_175115	67143	IKAROS family zinc finger 5	-11.7723	0.252529	12.0249	0.00257073	0.912709	0.00221197	0.0620518	0.997592	0.10513
Gfod1	NM_001033399	328232	glucose-fructose oxidoreductase domain containing 1	-8.78529	-0.247408	8.53789	0.00786311	0.914452	0.0091287	0.0922598	0.998425	0.118878
Fbxw4	NM_013907	30838	F-box and WD-40 domain protein 4	-10.405	2.02979	12.4348	0.00805558	0.419585	0.00267921	0.0931738	0.825476	0.10513
Prl8a2	NM_010088	13529	prolactin family 8, subfamily a, member 2	12.9935	0	-12.9935	0.00355703	1	0.00197629	0.0698729	1	0.10513
Havcr1	NM_134248	171283	hepatitis A virus cellular receptor 1	-13.221	-4.16839	9.05261	0.00245735	0.145124	0.0202665	0.061286	0.574552	0.146833
Rbks	NM_153196	71336	ribokinase	-12.7206	-2.10948	10.6111	0.00171008	0.386903	0.00576092	0.0529496	0.797912	0.111349
Olfr214	NM_146759	258754	olfactory receptor 214	13.415	0	-13.415	0.00273074	1	0.00150605	0.0630303	1	0.103582
Cd14	NM_009841	12475	CD14 antigen	12.0939	11.6895	-0.404341	0.00275478	0.00344558	0.865719	0.0632068	0.383054	0.952276
Mmp21	NM_152944	214766	matrix metallopeptidase 21	12.9851	0	-12.9851	0.00270307	1	0.00144497	0.0630303	1	0.103582
Dhrs9	NM_175512	241452	dehydrogenase/reductase (SDR family) member 9	-12.3565	-1.06274	11.2938	0.00433655	0.681218	0.00727736	0.0743007	0.94375	0.114605
Fasl	NM_010177	14103	Fas ligand (TNF superfamily, member 6)	-12.8493	-2.98044	9.86883	0.00575643	0.312963	0.020812	0.0819408	0.742676	0.147956
Ebp	NM_007898	13595	phenylalkylamine Ca2+ antagonist (emopamil) binding protein	-12.3999	-0.82607	11.5739	0.00253245	0.732306	0.00398419	0.0619333	0.958979	0.106783
Adamtsl2	NM_029981	77794	ADAMTS-like 2	-12.7488	-1.9214	10.8274	0.00134354	0.416351	0.00427123	0.0497547	0.823553	0.107937
Ttc16	NM_177384	338348	tetratricopeptide repeat domain 16	13.2445	9.79658	-3.4479	0.0014445	0.00984646	0.188864	0.0504951	0.383054	0.40816
Armc7	NM_177778	276905	armadillo repeat containing 7	-10.7145	1.4453	12.1598	0.00600711	0.55112	0.00266707	0.0831568	0.885858	0.10513
BC052040	NM_207264	399568	cDNA sequence BC052040	-12.9966	-2.69671	10.2999	0.00149204	0.280555	0.00700325	0.051004	0.710556	0.113692
Zfp146	NM_011980	26465	zinc finger protein 146	-12.5292	-1.31869	11.2105	0.0015471	0.570693	0.0034148	0.0514825	0.893098	0.105471
Lrrc20	NM_153542	216011	leucine rich repeat containing 20	-12.4307	-1.26869	11.1621	0.00401136	0.623522	0.00749051	0.0728561	0.917156	0.11461
Afg3l1	NR_028260	114896	AFG3(ATPase family gene 3)-like 1 (yeast)	-11.6844	0.308021	11.9925	0.00378328	0.898044	0.00319427	0.071355	0.995128	0.105166
Hnf4a	NM_008261	15378	hepatic nuclear factor 4, alpha	13.3131	8.71506	-4.59807	0.00273131	0.0255344	0.123657	0.0630303	0.392646	0.325392
Trmt12	NM_026642	68260	tRNA methyltranferase 12 homolog (S. cerevisiae)	-11.385	0.659986	12.045	0.00768587	0.800276	0.00561784	0.0913934	0.972931	0.111349
Lcn10	NM_178036	332578	lipocalin 10	-12.829	-3.01547	9.81357	0.00414296	0.286224	0.0170283	0.0736205	0.717703	0.139919
Cyb5d2	NM_001024926	192986	cytochrome b5 domain containing 2	-11.6424	0.226074	11.8684	0.00424485	0.925951	0.00375888	0.0739234	0.999541	0.106093
Aqp3	NM_016689	11828	aquaporin 3	-12.9891	-4.55058	8.43855	0.00487931	0.146034	0.0369617	0.077387	0.574552	0.183444
Vegfa	NM_009505	22339	vascular endothelial growth factor A	-12.4671	-1.2445	11.2226	0.0016919	0.594032	0.00354329	0.0528695	0.905413	0.105473
Htr1f	NM_008310	15557	5-hydroxytryptamine (serotonin) receptor 1F	-13.0073	-9.20539	3.80187	0.00394651	0.0143615	0.274677	0.072315	0.386911	0.49568
Elmod2	NM_178736	244548	ELMO domain containing 2	-10.8237	1.39247	12.2162	0.00834791	0.587744	0.00414579	0.094773	0.903697	0.107526
Rab36	NM_029781	76877	RAB36, member RAS oncogene family	-12.9572	-2.94687	10.0104	0.00191226	0.254949	0.00961432	0.0556238	0.692655	0.119786
AI316807	NM_001146117	102032	expressed sequence AI316807	-12.8158	-2.15262	10.6631	0.00138714	0.370016	0.00497892	0.0500208	0.784219	0.109949
Trib3	NM_175093	228775	tribbles homolog 3 (Drosophila)	-12.8934	-3.66834	9.22508	0.00550696	0.226879	0.0271775	0.0809084	0.664611	0.162003
Gm5544	NM_001033779	433632	predicted gene 5544	-12.9989	-12.9989	0	0.00376185	0.00201882	0.999803	0.0711799	0.383054	1
Rasef	NM_001017427	242505	RAS and EF hand domain containing	-10.0091	-5.70749	4.30165	0.00777893	0.0640563	0.152285	0.0919693	0.445992	0.361935
Nlrx1	NM_178420	270151	NLR family member X1	-12.7652	-2.00292	10.7623	0.00220722	0.424328	0.00654192	0.0586265	0.829277	0.112886
Pigyl	NM_001082532	66268	phosphatidylinositol glycan anchor biosynthesis, class Y-like	-12.0336	-0.358591	11.6751	0.00464973	0.887372	0.00555765	0.0759087	0.993629	0.111349
Abhd14b	NM_029631	76491	abhydrolase domain containing 14b	-9.31735	-2.85529	6.46206	0.00550443	0.244476	0.0318857	0.0809084	0.681339	0.171753
Gdf11	NM_010272	14561	growth differentiation factor 11	-12.3256	-0.95255	11.373	0.00218552	0.687365	0.00376969	0.0585732	0.947	0.106093
Inpp5j	NM_172439	170835	inositol polyphosphate 5-phosphatase J	-12.9536	-2.9879	9.96566	0.00148153	0.235952	0.0083226	0.051004	0.672662	0.117345
Fbxw24	NM_001013776	382106	F-box and WD-40 domain protein 24	12.9347	6.32782	-6.60683	0.00459266	0.0916272	0.0540388	0.0754369	0.501116	0.214218
Pilra	NM_153510	231805	paired immunoglobin-like type 2 receptor alpha	-11.0329	0.97214	12.005	0.00620856	0.694222	0.00370793	0.0838743	0.949238	0.106093
Slc18a2	NM_172523	214084	solute carrier family 18 (vesicular monoamine), member 2	12.1631	11.7529	-0.410219	0.00424468	0.00519991	0.871575	0.0739234	0.383054	0.955592
Crebl2	NM_177687	232430	cAMP responsive element binding protein-like 2	-12.908	-4.00457	8.90341	0.00383373	0.173529	0.0256749	0.071355	0.615118	0.158351
Cyp4a30b	NA	NA	NA	-13.1701	-13.1701	0	0.00167063	0.000805541	0.999441	0.0528488	0.383054	1
1200011M11Rik	NM_024262	74133	RIKEN cDNA 1200011M11 gene	-12.3462	-1.02338	11.3228	0.00306299	0.678792	0.00526675	0.0662219	0.942805	0.11111
Dhx16	NM_026987	69192	DEAH (Asp-Glu-Ala-His) box polypeptide 16	9.33197	7.65561	-1.67637	0.00595881	0.0162268	0.48142	0.0830991	0.386911	0.686549
Sec22c	NM_178677	215474	SEC22 vesicle trafficking protein homolog C (S. cerevisiae)	-11.7179	-0.0204458	11.6974	0.00382245	0.993233	0.00386374	0.071355	1	0.106221
Gimap6	NM_153175	231931	GTPase, IMAP family member 6	-12.8201	-2.57631	10.2438	0.00231997	0.318865	0.00918789	0.059763	0.748076	0.119004
Fermt1	NM_198029	241639	fermitin family homolog 1 (Drosophila)	12.8847	8.23718	-4.64749	0.00515937	0.0399835	0.142004	0.078692	0.411871	0.350038
Rras2	NM_025846	66922	related RAS viral (r-ras) oncogene homolog 2	-12.7756	-2.12343	10.6522	0.00139272	0.375035	0.00493831	0.0500208	0.785269	0.109778
rp9	NA	NA	NA	13.2553	8.3085	-4.94684	0.000992482	0.0192847	0.0681386	0.0451531	0.386911	0.240591
Mc5r	NM_013596	17203	melanocortin 5 receptor	13.3215	8.19452	-5.12696	0.00265756	0.0326575	0.0932104	0.0626806	0.398845	0.282893
Mrpl33	NM_025796	66845	mitochondrial ribosomal protein L33	-11.2754	0.784737	12.0601	0.0053034	0.74922	0.0034888	0.0798389	0.963012	0.105471
Jagn1	NM_026365	67767	jagunal homolog 1 (Drosophila)	-12.1284	-0.556446	11.572	0.00460785	0.827222	0.00606251	0.0755573	0.980485	0.11228
4933424B01Rik	NM_138757	71177	RIKEN cDNA 4933424B01 gene	-10.8914	1.35495	12.2463	0.00826819	0.598908	0.00420596	0.0942912	0.907619	0.107642
4933439C10Rik	NR_015585	74476	RIKEN cDNA 4933439C10 gene	12.8917	8.41017	-4.48158	0.00344225	0.03012	0.132642	0.0692265	0.393529	0.338196
Ndufb7	NM_025843	66916	NADH dehydrogenase (ubiquinone) 1 beta subcomplex, 7	-12.2425	-0.707067	11.5355	0.00222471	0.76347	0.00334275	0.0586577	0.96571	0.105166
Olfr56	NM_010999	18356	olfactory receptor 56	-10.9621	1.11557	12.0777	0.00620591	0.651032	0.00341276	0.0838743	0.931078	0.105471
Otx2	NM_144841	18424	orthodenticle homolog 2 (Drosophila)	-12.9579	-8.75917	4.19877	0.00426055	0.0184807	0.235433	0.074049	0.386911	0.458607
Ssna1	NM_023464	68475	Sjogren's syndrome nuclear autoantigen 1	-12.5723	-1.74886	10.8235	0.00360863	0.502291	0.00860591	0.0702131	0.85766	0.117927
Pla2g12a	NM_183423	66350	phospholipase A2, group XIIA	-11.7906	-0.0423788	11.7482	0.00291876	0.985559	0.00298961	0.0647071	1	0.10513
Rnf43	NM_172448	207742	ring finger protein 43	-12.6131	-2.01558	10.5975	0.00226725	0.418619	0.00686468	0.0591078	0.825261	0.113575
Commd1	NM_144514	17846	COMM domain containing 1	-9.93932	2.46982	12.4091	0.00928099	0.32471	0.00230811	0.0997532	0.750015	0.10513
BC011248	NA	NA	NA	-12.3072	-0.890203	11.417	0.00254225	0.711157	0.00416586	0.062012	0.95509	0.107526
Ankrd16	NM_177268	320816	ankyrin repeat domain 16	-11.9737	-0.30231	11.6714	0.00232348	0.895842	0.00277697	0.059763	0.995128	0.10513
Il15	NM_008357	16168	interleukin 15	-12.8138	-2.77138	10.0424	0.0013269	0.257562	0.00700305	0.0497547	0.696005	0.113692
Mapk1ip1	NM_027115	69546	mitogen-activated protein kinase 1 interacting protein 1	-8.3447	-1.26823	7.07647	0.00914645	0.585829	0.0199399	0.0987647	0.903292	0.146276
4930578N16Rik	NM_001077684	75051	RIKEN cDNA 4930578N16 gene	-12.8478	-2.62628	10.2215	0.00137145	0.283177	0.00651948	0.0500208	0.713832	0.112886
Nlrp3	NM_145827	216799	NLR family, pyrin domain containing 3	12.8776	3.80211	-9.0755	0.00416004	0.268989	0.0156644	0.0736205	0.700768	0.135502
4930455C21Rik	NM_024273	76916	RIKEN cDNA 4930455C21 gene	-10.6214	1.60912	12.2305	0.00913823	0.532674	0.00405588	0.0987647	0.875943	0.107021
Rps16	NM_013647	20055	ribosomal protein S16	-13.1271	-5.53034	7.59677	0.00174991	0.0584715	0.036806	0.0537042	0.437526	0.182916
Zbtb2	NM_001033466	381990	zinc finger and BTB domain containing 2	-11.5223	0.378763	11.901	0.0042249	0.875219	0.00343436	0.0739138	0.990202	0.105471
Clpb	NM_009191	20480	ClpB caseinolytic peptidase B homolog (E. coli)	-12.396	-1.17565	11.2203	0.00177924	0.614387	0.00357315	0.0540752	0.912987	0.105473
Ankzf1	NR_051999	52231	ankyrin repeat and zinc finger domain containing 1	-11.6252	0.249419	11.8746	0.00346079	0.916025	0.00300467	0.0692265	0.998425	0.10513
Serpinf2	NM_008878	18816	serine (or cysteine) peptidase inhibitor, clade F, member 2	12.8585	0	-12.8585	0.00249764	1	0.00130784	0.0615686	1	0.103582
Ghdc	NM_031871	80860	GH3 domain containing	11.1044	12.0943	0.98986	0.00697055	0.00424185	0.697449	0.087899	0.383054	0.849423
Tex11	NM_031384	83558	testis expressed gene 11	12.706	9.8902	-2.81578	0.00348844	0.0138666	0.30335	0.0694396	0.386911	0.527969
Serinc2	NM_172702	230779	serine incorporator 2	-13.0962	-4.31985	8.77631	0.0027722	0.136547	0.0240814	0.063208	0.564578	0.15564
6330409N04Rik	NM_025697	66674	RIKEN cDNA 6330409N04 gene	-10.7807	1.29123	12.0719	0.0057944	0.592937	0.0028066	0.0819783	0.905389	0.10513
Leng1	NM_027203	69757	leukocyte receptor cluster (LRC) member 1	-10.3339	1.94569	12.2796	0.00714465	0.426242	0.00236209	0.0885898	0.829857	0.10513
Eif2b4	NM_010122	13667	eukaryotic translation initiation factor 2B, subunit 4 delta	-12.4068	-1.36876	11.038	0.00280874	0.580085	0.00585562	0.063586	0.899904	0.111365
Reep2	NM_144865	225362	receptor accessory protein 2	-12.9301	-2.90134	10.0288	0.00166088	0.253279	0.0085803	0.0528488	0.690825	0.117927
Ccl7	NM_013654	20306	chemokine (C-C motif) ligand 7	-11.8002	-0.127871	11.6723	0.00288982	0.956427	0.00310946	0.0644722	1	0.105166
Egr3	NM_018781	13655	early growth response 3	-12.9118	-12.9118	0	0.0018729	0.000898428	0.999498	0.0551823	0.383054	1
Dnaja4	NM_021422	58233	DnaJ (Hsp40) homolog, subfamily A, member 4	-11.0718	0.84996	11.9218	0.00564366	0.727676	0.00356278	0.0815234	0.957482	0.105473
Ubac2	NM_026861	68889	ubiquitin associated domain containing 2	-11.3538	0.524923	11.8787	0.00472213	0.828387	0.00354821	0.0765462	0.980485	0.105473
Mpa2l	NA	NA	NA	-12.4984	-1.5602	10.9382	0.00164034	0.506897	0.00415756	0.0526739	0.860372	0.107526
Zfp108	NM_018791	54678	zinc finger protein 108	-12.511	-1.47441	11.0366	0.00188953	0.536376	0.0044286	0.0554083	0.877819	0.108049
Flrt3	NM_178382	71436	fibronectin leucine rich transmembrane protein 3	-12.6578	-2.28896	10.3688	0.0034951	0.389296	0.0108907	0.0694396	0.800411	0.124097
G0s2	NM_008059	14373	G0/G1 switch gene 2	-12.8968	-2.9773	9.91953	0.00209258	0.253843	0.0105028	0.0578918	0.69129	0.122612
Htra4	NM_001081187	330723	HtrA serine peptidase 4	-12.8431	-4.17563	8.66746	0.00353006	0.153318	0.0270899	0.0696746	0.585375	0.161918
Zdhhc4	NM_028379	72881	zinc finger, DHHC domain containing 4	-12.6001	-1.79203	10.808	0.00167939	0.453195	0.00480012	0.0528488	0.836658	0.109013
Tmem41b	NM_153525	233724	transmembrane protein 41B	-11.7232	-0.0475431	11.6757	0.00275966	0.983608	0.00283653	0.063208	1	0.10513
Pcmtd2	NM_153594	245867	protein-L-isoaspartate (D-aspartate) O-methyltransferase domain containing 2	-11.0879	0.992454	12.0804	0.0041186	0.672128	0.00230287	0.0736205	0.939558	0.10513
9630033F20Rik	NM_177003	319801	RIKEN cDNA 9630033F20 gene	-12.3067	-0.933666	11.373	0.00444319	0.717535	0.00700132	0.0743007	0.95515	0.113692
Snx17	NM_153680	266781	sorting nexin 17	-11.2396	0.761042	12.0006	0.00366203	0.743617	0.00233754	0.0707333	0.961636	0.10513
BC051665	NM_199148	218275	cDNA sequence BC051665	-12.914	-3.15413	9.75984	0.00325231	0.255385	0.0153134	0.0682139	0.693353	0.13516
Serpine1	NM_008871	18787	serine (or cysteine) peptidase inhibitor, clade E, member 1	11.3641	12.0404	0.676331	0.00395304	0.00270288	0.776733	0.0723381	0.383054	0.901051
4833424O15Rik	NM_029425	75769	RIKEN cDNA 4833424O15 gene	-11.3016	0.57851	11.8801	0.00684253	0.8202	0.00513314	0.0871747	0.979226	0.110917
Zfp599	NM_181419	235048	zinc finger protein 599	-12.3952	-1.59865	10.7965	0.00482672	0.548719	0.010286	0.0771552	0.884633	0.122092
5430437P03Rik	NM_026636	68251	RIKEN cDNA 5430437P03 gene	-12.3934	-1.24862	11.1448	0.00195693	0.597098	0.00404547	0.0564045	0.906983	0.107021
Ier3	NM_133662	15937	immediate early response 3	-11.1986	0.771758	11.9703	0.00707012	0.761678	0.00480915	0.0884933	0.96548	0.109013
AA415398	NM_001004178	433752	expressed sequence AA415398	-12.8723	-5.76482	7.10745	0.00524957	0.083282	0.0682257	0.0793858	0.485211	0.240716
Dgkh	NR_045588	380921	diacylglycerol kinase, eta	-11.8753	-0.388054	11.4872	0.00261325	0.867566	0.00327609	0.0623674	0.98856	0.105166
Cyp2r1	NM_177382	244209	cytochrome P450, family 2, subfamily r, polypeptide 1	12.7823	8.21238	-4.56988	0.00366676	0.0334049	0.127417	0.0707509	0.399779	0.330666
Engase	NM_172573	217364	endo-beta-N-acetylglucosaminidase	12.1277	11.3063	-0.821352	0.00438216	0.00657911	0.747837	0.0743007	0.383054	0.883112
Vamp1	NM_009496	22317	vesicle-associated membrane protein 1	-11.8285	-0.124159	11.7043	0.00296701	0.957917	0.00318331	0.065017	1	0.105166
Stox1	NM_001033260	216021	storkhead box 1	-12.8462	-4.49953	8.34665	0.00546217	0.152413	0.0395279	0.0809084	0.585128	0.188181
Olfr1184	NM_146823	258820	olfactory receptor 1184	12.7639	8.3195	-4.44442	0.00567405	0.0393899	0.158655	0.0815816	0.410946	0.369041
Lix1l	NM_001163170	280411	Lix1-like	-10.8397	1.21271	12.0524	0.00498493	0.609016	0.00246863	0.0778934	0.910979	0.10513
Tube1	NM_028006	71924	epsilon-tubulin 1	-12.8196	-4.2317	8.58791	0.0034048	0.146543	0.0274849	0.0692005	0.574552	0.162891
2700023E23Rik	NR_015531	70036	RIKEN cDNA 2700023E23 gene	13.1706	8.33933	-4.83128	0.00438188	0.0374463	0.128274	0.0743007	0.405767	0.331989
Trmt61b	NR_027953	68789	tRNA methyltransferase 61 homolog B (S. cerevisiae)	-12.8841	-3.33809	9.54599	0.00561133	0.265173	0.0237999	0.0813328	0.700311	0.154868
Gpx7	NM_024198	67305	glutathione peroxidase 7	12.5279	11.0517	-1.4762	0.00285743	0.0061693	0.557774	0.0641349	0.383054	0.746999
Tmem179b	NR_028419	67706	transmembrane protein 179B	-10.1649	2.02225	12.1872	0.00771423	0.408074	0.0024208	0.0916133	0.816588	0.10513
Kcnj15	NM_019664	16516	potassium inwardly-rectifying channel, subfamily J, member 15	-12.0141	-0.644595	11.3695	0.00546977	0.803671	0.00744902	0.0809084	0.974633	0.11461
Oc90	NM_010953	18256	otoconin 90	-12.9976	-5.00173	7.99586	0.00255713	0.0901901	0.0337809	0.0620518	0.499477	0.176681
Slitrk3	NM_198864	386750	SLIT and NTRK-like family, member 3	-12.2806	-1.23293	11.0477	0.00435827	0.633496	0.00799048	0.0743007	0.921982	0.116892
Speer2	NM_173069	224318	spermatogenesis associated glutamate (E)-rich protein 2	-13.0294	-10.9407	2.08874	0.00367767	0.00593322	0.494515	0.0708516	0.383054	0.692984
Morn4	NM_198108	226123	MORN repeat containing 4	-10.3665	1.8252	12.1917	0.00662952	0.449818	0.00230657	0.0860539	0.836053	0.10513
Ipo4	NM_024267	75751	importin 4	-11.4229	0.321454	11.7443	0.00655688	0.899527	0.00559243	0.0855249	0.995128	0.111349
Arhgap24	NM_146161	231532	Rho GTPase activating protein 24	-11.3367	0.513524	11.8502	0.00352803	0.825248	0.00260907	0.0696746	0.980358	0.10513
Gmpr	NM_025508	66355	guanosine monophosphate reductase	12.5744	10.8702	-1.70428	0.00382908	0.00875057	0.518019	0.071355	0.383054	0.713738
Tro	NM_019548	56191	trophinin	-11.9849	-0.696004	11.2889	0.00302012	0.77136	0.0044487	0.0657203	0.967039	0.108049
Rasd2	NM_029182	75141	RASD family, member 2	-12.9843	-5.56127	7.423	0.00156702	0.0524949	0.0378	0.051546	0.426452	0.184984
Nup37	NM_028334	69736	nucleoporin 37	12.6572	9.01589	-3.6413	0.00431978	0.0239561	0.210517	0.0743007	0.386911	0.434824
Slc17a1	NM_009198	20504	solute carrier family 17 (sodium phosphate), member 1	-9.81296	-5.64594	4.16702	0.00748151	0.0613125	0.156692	0.0902111	0.441701	0.366956
Scn4b	NM_001013390	399548	sodium channel, type IV, beta	-12.8037	-4.81394	7.9898	0.00372007	0.111768	0.0384554	0.0709489	0.525863	0.186082
Cercam	NM_207298	99151	cerebral endothelial cell adhesion molecule	-12.4356	-1.79734	10.6383	0.0019012	0.453362	0.00542323	0.0555969	0.836658	0.11111
Mtch2	NM_019758	56428	mitochondrial carrier homolog 2 (C. elegans)	-11.7276	-0.122613	11.605	0.00273351	0.957712	0.00293688	0.0630303	1	0.10513
Rybp	NM_019743	56353	RING1 and YY1 binding protein	-11.4293	0.35641	11.7857	0.00357449	0.879088	0.00290897	0.0698729	0.991589	0.10513
Sik1	NM_010831	17691	salt inducible kinase 1	-12.671	-2.48324	10.1877	0.00157861	0.309372	0.00682422	0.0515884	0.739518	0.113575
Kcng1	NM_001081134	241794	potassium voltage-gated channel, subfamily G, member 1	-12.9875	-10.6214	2.36612	0.00214874	0.00405402	0.452949	0.0583112	0.383054	0.666812
Drd1a	NM_010076	13488	dopamine receptor D1A	-12.7776	-5.15451	7.62308	0.00349213	0.0907656	0.0445946	0.0694396	0.499477	0.19927
Adam4	NM_009620	11498	a disintegrin and metallopeptidase domain 4	-12.2374	-1.30314	10.9343	0.00657949	0.63361	0.0117511	0.0856441	0.922003	0.126817
Zh2c2	NA	NA	NA	12.432	11.0926	-1.33947	0.00288114	0.00583203	0.591674	0.0644333	0.383054	0.773426
Tmem60	NM_177601	212090	transmembrane protein 60	-11.0111	0.936468	11.9475	0.00475663	0.693326	0.00278567	0.0769099	0.949131	0.10513
Tceanc	NM_001007577	245695	transcription elongation factor A (SII) N-terminal and central domain containing	-12.113	-0.945896	11.1671	0.00472589	0.712846	0.0075252	0.0765462	0.95515	0.11461
Golga7b	NM_027694	71146	golgi autoantigen, golgin subfamily a, 7B	-12.6648	-3.64982	9.015	0.00507644	0.217416	0.0268309	0.0782262	0.664611	0.161172
Kcnh7	NM_133207	170738	potassium voltage-gated channel, subfamily H (eag-related), member 7	12.116	11.3738	-0.742153	0.00294744	0.00441343	0.759498	0.0649867	0.383054	0.890238
Zcchc17	NM_153160	619605	zinc finger, CCHC domain containing 17	-10.7677	1.14116	11.9089	0.00506238	0.628454	0.00259992	0.0782262	0.920257	0.10513
Acvrl1	NM_009612	11482	activin A receptor, type II-like 1	-12.7844	-2.86666	9.91774	0.00345424	0.295115	0.0141313	0.0692265	0.725901	0.131613
Fam189a1	NM_183087	70638	family with sequence similarity 189, member A1	-12.6512	-3.23071	9.42049	0.00219698	0.216242	0.0131105	0.0585732	0.663405	0.129033
Gpr165	NM_029536	76206	G protein-coupled receptor 165	12.6979	8.02034	-4.67761	0.00437746	0.0391424	0.127137	0.0743007	0.410783	0.330567
Foxp3	NM_054039	20371	forkhead box P3	-10.0809	2.01332	12.0942	0.00790371	0.408138	0.0024715	0.0925606	0.816627	0.10513
Ints5	NM_176843	109077	integrator complex subunit 5	-12.578	-2.78633	9.79163	0.00263441	0.285069	0.0117192	0.0625272	0.71644	0.126766
Ppil1	NM_026845	68816	peptidylprolyl isomerase (cyclophilin)-like 1	-12.1698	-1.07673	11.0931	0.00209377	0.644914	0.00395212	0.0578918	0.928408	0.106402
Cenpq	NM_031863	83815	centromere protein Q	-12.353	-1.52686	10.8261	0.00194565	0.519626	0.00476036	0.0561668	0.86902	0.108954
Grhpr	NM_080289	76238	glyoxylate reductase/hydroxypyruvate reductase	-12.8048	-3.57361	9.23118	0.00177029	0.171746	0.0134978	0.0540464	0.614173	0.130066
Rfx8	NM_001145660	619289	regulatory factor X 8	12.6963	5.74864	-6.94768	0.00526089	0.119937	0.0469973	0.0793924	0.539968	0.203695
Tmem120a	NM_172541	215210	transmembrane protein 120A	-12.6892	-3.48429	9.20493	0.00364283	0.215938	0.020237	0.0705091	0.663286	0.146833
Olfr1012	NM_146568	258561	olfactory receptor 1012	-12.7501	-6.35877	6.39132	0.00538307	0.0620063	0.0930455	0.0804972	0.441814	0.282808
Nmd3	NM_133787	97112	NMD3 homolog (S. cerevisiae)	-9.21412	-1.91904	7.29508	0.00834198	0.439584	0.0245698	0.0947637	0.836053	0.155835
Ripk4	NM_023663	72388	receptor-interacting serine-threonine kinase 4	-12.9103	-4.92708	7.9832	0.00542071	0.125866	0.0469921	0.0808036	0.550468	0.203695
Kif18a	NM_139303	228421	kinesin family member 18A	-12.441	-2.02581	10.4152	0.00415212	0.445691	0.0111837	0.0736205	0.836053	0.12484
Prps1	NM_021463	19139	phosphoribosyl pyrophosphate synthetase 1	-12.5532	-2.59563	9.95754	0.00186093	0.295306	0.0083562	0.0550041	0.725901	0.117345
Med9	NM_138675	192191	mediator of RNA polymerase II transcription, subunit 9 homolog (yeast)	-11.6457	-0.209726	11.436	0.00615491	0.934746	0.00681584	0.0836045	1	0.113575
Pira7	NM_011094	18730	paired-Ig-like receptor A7	-12.8731	-3.75084	9.12222	0.00211926	0.165003	0.0162624	0.0579415	0.603503	0.136977
Aimp1	NM_007926	13722	aminoacyl tRNA synthetase complex-interacting multifunctional protein 1	-10.9517	0.950528	11.9022	0.00642851	0.700235	0.00387772	0.0849296	0.950309	0.106221
Pgs1	NM_133757	74451	phosphatidylglycerophosphate synthase 1	-9.93696	2.13052	12.0675	0.00877186	0.384983	0.00258161	0.0968741	0.795508	0.10513
Fam164c	NM_172414	72350	family with sequence similarity 164, member C	12.6219	9.60829	-3.01363	0.00157205	0.00927091	0.228217	0.051546	0.383054	0.455306
Tmcc2	NM_178874	68875	transmembrane and coiled-coil domains 2	-12.0674	-1.05285	11.0145	0.00256414	0.657555	0.00468263	0.0620518	0.933818	0.108954
Pira4	NM_011091	18727	paired-Ig-like receptor A4	-12.8635	-3.74129	9.12222	0.00210728	0.165372	0.0161626	0.0578918	0.604261	0.136679
Cxcr6	NM_030712	80901	chemokine (C-X-C motif) receptor 6	-12.3368	-1.70316	10.6337	0.00445211	0.518129	0.0101971	0.0743007	0.867772	0.12209
Rhd	NM_011270	19746	Rh blood group, D antigen	-12.8822	-4.35978	8.5224	0.00381139	0.144147	0.0305514	0.071355	0.574342	0.169148
Eme1	NM_177752	268465	essential meiotic endonuclease 1 homolog 1 (S. pombe)	-11.1695	0.532951	11.7024	0.00402682	0.819596	0.00295093	0.072994	0.979226	0.10513
Rhbdl2	NM_183163	230726	rhomboid, veinlet-like 2 (Drosophila)	13.0888	4.19872	-8.89007	0.00384102	0.229208	0.0172752	0.071355	0.664611	0.140291
Elfn1	NM_175522	243312	leucine rich repeat and fibronectin type III, extracellular 1	12.0263	10.8889	-1.13733	0.00655134	0.0109657	0.673503	0.0855249	0.383054	0.83266
Gm239	NM_001033333	237558	predicted gene 239	-12.7783	-3.53382	9.24451	0.00415568	0.220802	0.0220475	0.0736205	0.664611	0.151447
Tmem72	NM_178768	319776	transmembrane protein 72	-12.6892	-4.34551	8.34373	0.00235695	0.118159	0.0250491	0.0601545	0.536232	0.156674
Rrp15	NM_026041	67223	ribosomal RNA processing 15 homolog (S. cerevisiae)	-12.3434	-1.78669	10.5567	0.00424536	0.496394	0.0102253	0.0739234	0.854919	0.12209
Tomt	NM_001081679	791260	transmembrane O-methyltransferase	-11.9582	-1.02813	10.9301	0.00642742	0.699049	0.010353	0.0849296	0.950309	0.122092
Pbk	NM_023209	52033	PDZ binding kinase	-11.2	0.48663	11.6867	0.00389319	0.834615	0.00292786	0.071915	0.981213	0.10513
Nhp2	NM_026631	52530	NHP2 ribonucleoprotein homolog (yeast)	-12.4466	-1.82778	10.6188	0.00202883	0.449892	0.00579755	0.0574382	0.836053	0.111349
Srpk3	NM_019684	56504	serine/arginine-rich protein specific kinase 3	-11.7075	-0.314267	11.3933	0.00373287	0.895988	0.00443405	0.0709933	0.995128	0.108049
Smtn	NM_013870	29856	smoothelin	-12.6356	-3.5305	9.1051	0.00209814	0.179751	0.0151497	0.0578918	0.625072	0.134902
Gm14548	NM_001166672	100038909	predicted gene 14548	-12.8574	-3.95245	8.90494	0.00332808	0.169154	0.0233925	0.0690233	0.60956	0.154085
Pira11	NM_011088	18724	paired-Ig-like receptor A11	-12.8574	-3.95245	8.90494	0.00333276	0.169229	0.0234107	0.0690432	0.609709	0.1541
Otos	NM_153114	260301	otospiralin	12.6472	0	-12.6472	0.00461787	1	0.00259872	0.0755881	1	0.10513
Crabp2	NM_007759	12904	cellular retinoic acid binding protein II	-12.9047	-6.71376	6.19094	0.0037761	0.0441899	0.0939875	0.071355	0.418207	0.283879
Mocs1	NM_028464	56738	molybdenum cofactor synthesis 1	-10.3449	1.65316	11.998	0.00875267	0.50929	0.00361259	0.0968127	0.862021	0.105768
Egf	NM_010113	13645	epidermal growth factor	9.51194	4.22624	-5.2857	0.00885062	0.151795	0.0753445	0.0969945	0.583357	0.252673
Dydc1	NM_027094	69496	DPY30 domain containing 1	13.0663	3.76227	-9.30406	0.00283116	0.263441	0.0107327	0.0638543	0.700311	0.123502
Eif1ad	NM_027236	69860	eukaryotic translation initiation factor 1A domain containing	-12.2085	-1.54814	10.6604	0.00236082	0.519412	0.00573014	0.0601545	0.868901	0.111349
Dcps	NM_027030	69305	decapping enzyme, scavenger	-12.0526	-0.999282	11.0533	0.00493811	0.698265	0.00806082	0.0776789	0.950309	0.116986
Krba1	NM_133922	77827	KRAB-A domain containing 1	-11.7741	-0.471442	11.3027	0.00307091	0.841581	0.00401661	0.0662219	0.983096	0.107021
Ttc29	NM_183096	73301	tetratricopeptide repeat domain 29	-12.8746	-5.43725	7.43736	0.00549953	0.0992516	0.0599413	0.0809084	0.509825	0.225548
Slc26a1	NM_174870	231583	solute carrier family 26 (sulfate transporter), member 1	-12.2305	-1.75348	10.477	0.0030659	0.482853	0.0078879	0.0662219	0.850195	0.116018
1110051M20Rik	NM_175123	228356	RIKEN cDNA 1110051M20 gene	-12.1953	-1.2139	10.9814	0.00246966	0.612029	0.0049175	0.061286	0.912514	0.109578
Chst8	NM_175140	68947	carbohydrate (N-acetylgalactosamine 4-0) sulfotransferase 8	-12.4328	-2.24823	10.1846	0.00409647	0.400005	0.0123714	0.0735383	0.808692	0.127365
Zdhhc15	NM_175358	108672	zinc finger, DHHC domain containing 15	-11.5614	-0.150911	11.4105	0.00636811	0.952963	0.00685353	0.0847652	1	0.113575
Alkbh2	NM_175016	231642	alkB, alkylation repair homolog 2 (E. coli)	-12.6788	-4.31553	8.36329	0.00372088	0.141271	0.0310618	0.0709489	0.571674	0.17004
Gtse1	NM_013882	29870	G two S phase expressed protein 1	-11.4659	0.0904987	11.5564	0.00401584	0.969702	0.00381646	0.0728661	1	0.106221
Pcyt2	NM_024229	68671	phosphate cytidylyltransferase 2, ethanolamine	-12.2935	-1.49081	10.8027	0.00214493	0.53211	0.00507936	0.058293	0.875943	0.110385
Ap1s3	NM_183027	252903	adaptor-related protein complex AP-1, sigma 3	-12.7437	-3.82616	8.9175	0.00229516	0.158694	0.0183101	0.0595011	0.594563	0.143052
Bzw2	NM_025840	66912	basic leucine zipper and W2 domains 2	-12.2517	-1.73	10.5217	0.00339071	0.494479	0.0084092	0.0692005	0.854164	0.117627
Tlcd2	NM_027249	380712	TLC domain containing 2	-12.8685	-9.97929	2.88916	0.00227402	0.0054773	0.370537	0.0592011	0.383054	0.590903
Fam55b	NM_030069	78252	family with sequence similarity 55, member B	11.5585	11.367	-0.191505	0.0060701	0.00666544	0.940255	0.0833073	0.383054	0.992325
Dhfr	NM_010049	13361	dihydrofolate reductase	-10.6305	1.13536	11.7659	0.00626263	0.636827	0.00330178	0.0839972	0.923499	0.105166
Prc1	NM_145150	233406	protein regulator of cytokinesis 1	-10.9345	0.841951	11.7765	0.00455293	0.719232	0.00278132	0.0752048	0.95515	0.10513
Mrpl12	NM_027204	56282	mitochondrial ribosomal protein L12	-11.272	0.400936	11.673	0.00407307	0.864881	0.00323732	0.0733952	0.987506	0.105166
Postn	NM_015784	50706	periostin, osteoblast specific factor	-11.9117	-0.770662	11.1411	0.00282844	0.744648	0.0043911	0.0638543	0.962144	0.108049
Fam164a	NM_173181	67306	family with sequence similarity 164, member A	-11.0209	0.722667	11.7436	0.00459156	0.759143	0.00302671	0.0754369	0.965087	0.10513
Lsmd1	NM_030083	78304	LSM domain containing 1	-11.762	-0.513222	11.2488	0.00571272	0.841145	0.00734518	0.0818	0.982902	0.114605
Hunk	NM_015755	26559	hormonally upregulated Neu-associated kinase	-11.3061	0.281651	11.5877	0.00706945	0.912124	0.00615239	0.0884933	0.997592	0.112553
Tmem38a	NM_144534	74166	transmembrane protein 38A	-11.9629	-0.901002	11.0619	0.00246964	0.700299	0.00418241	0.061286	0.950309	0.107526
Aig1	NM_025446	66253	androgen-induced 1	-12.2622	-1.67748	10.5847	0.00455618	0.523415	0.0103368	0.0752048	0.870534	0.122092
Klhl29	NM_001164493	208439	kelch-like 29 (Drosophila)	-12.4513	-2.55632	9.89494	0.004294	0.347813	0.014855	0.0740815	0.764648	0.134101
Sec22a	NM_133704	317717	SEC22 vesicle trafficking protein homologe A (S. cerevisiae)	-11.5839	-0.139443	11.4445	0.00613393	0.956367	0.0065679	0.0836045	1	0.112886
Acpp	NM_207668	56318	acid phosphatase, prostate	9.67424	6.23337	-3.44087	0.00675166	0.0460355	0.195347	0.0868499	0.422516	0.415144
Gm12695	NM_001081284	620779	predicted gene 12695	13.0186	6.67909	-6.33951	0.00469067	0.0795586	0.0632568	0.0762758	0.475456	0.232234
Ptprn2	NM_011215	19276	protein tyrosine phosphatase, receptor type, N polypeptide 2	-12.3036	-1.61755	10.6861	0.00203486	0.497046	0.00523662	0.0574382	0.855248	0.111103
Usp21	NM_013919	30941	ubiquitin specific peptidase 21	-11.2743	0.174395	11.4487	0.00483537	0.942293	0.00439274	0.0771552	1	0.108049
2310004N24Rik	NA	NA	NA	-11.0387	0.688547	11.7273	0.00497889	0.77291	0.00337838	0.0778934	0.967449	0.105471
Pycrl	NM_025412	66194	pyrroline-5-carboxylate reductase-like	-12.4682	-2.29611	10.1721	0.00179806	0.344432	0.00694475	0.0541942	0.762382	0.113575
Ttll8	NM_172818	239591	tubulin tyrosine ligase-like family, member 8	12.979	7.79466	-5.18435	0.00505877	0.0492408	0.111426	0.0782262	0.423787	0.308562
Hgsnat	NM_029884	52120	heparan-alpha-glucosaminide N-acetyltransferase	-12.05	-1.32382	10.7262	0.00296461	0.585784	0.00618333	0.065017	0.903292	0.112553
Fam125a	NM_028617	73711	family with sequence similarity 125, member A	-12.2645	-1.77143	10.493	0.00451444	0.501185	0.0107448	0.0748187	0.857379	0.123502
rpf2	NA	NA	NA	-12.2081	-1.58014	10.628	0.00211951	0.505861	0.00535489	0.0579415	0.859713	0.11111
Slc25a20	NM_020520	57279	solute carrier family 25 (mitochondrial carnitine/acylcarnitine translocase), member 20	-10.3557	1.49955	11.8552	0.00706569	0.534365	0.00300643	0.0884933	0.876741	0.10513
Adora3	NM_027025	11542	adenosine A3 receptor	10.5051	11.9392	1.43401	0.00607877	0.00267522	0.550584	0.0833073	0.383054	0.7403
Rfc5	NM_028128	72151	replication factor C (activator 1) 5	-12.3896	-2.06693	10.3227	0.0020809	0.396254	0.00684462	0.0578285	0.805615	0.113575
Zfp668	NM_146259	244219	zinc finger protein 668	-12.3899	-2.22094	10.169	0.00204037	0.363579	0.00737817	0.0574382	0.78047	0.114605
Bid	NM_007544	12122	BH3 interacting domain death agonist	-11.4016	0.219799	11.6214	0.00498951	0.928329	0.00443556	0.0778934	0.999541	0.108049
Kcna5	NM_145983	16493	potassium voltage-gated channel, shaker-related subfamily, member 5	12.565	0	-12.565	0.00488822	1	0.0027576	0.0774191	1	0.10513
Rnf8	NM_021419	58230	ring finger protein 8	-11.6378	-0.291702	11.3461	0.00363779	0.902596	0.00427978	0.0705091	0.99572	0.107937
Hspb7	NM_013868	29818	heat shock protein family, member 7 (cardiovascular)	-12.8223	-10.7343	2.088	0.00433398	0.00700454	0.495427	0.0743007	0.383054	0.693471
Adam7	NM_007402	11500	a disintegrin and metallopeptidase domain 7	11.295	11.5749	0.279869	0.00699647	0.0061006	0.912988	0.0881061	0.383054	0.979249
Olfr1030	NM_146588	258581	olfactory receptor 1030	-12.499	-2.51842	9.98056	0.00746013	0.392433	0.0214378	0.0900942	0.802773	0.14998
0610009D07Rik	NM_025323	66055	RIKEN cDNA 0610009D07 gene	-11.8938	-0.825772	11.068	0.0036174	0.734997	0.00565141	0.0703102	0.958979	0.111349
Utp23	NM_030132	78581	UTP23, small subunit (SSU) processome component, homolog (yeast)	-11.2803	0.143015	11.4234	0.00421636	0.951788	0.00388557	0.0738341	1	0.106221
AF529169	NM_153509	209743	cDNA sequence AF529169	11.8667	10.9341	-0.932627	0.00533757	0.00840868	0.718143	0.0800291	0.383054	0.864137
C85492	NA	NA	NA	-12.7474	-5.01898	7.72843	0.00207668	0.0773623	0.0337507	0.0578285	0.471381	0.176673
Tnip2	NM_139064	231130	TNFAIP3 interacting protein 2	-11.3307	0.203032	11.5337	0.00493658	0.933324	0.00442229	0.0776789	1	0.108049
Zfp316	NM_017467	54201	zinc finger protein 316	-12.1631	-1.71593	10.4471	0.00343452	0.495991	0.00852007	0.0692265	0.854919	0.117846
Tiam1	NM_009384	21844	T-cell lymphoma invasion and metastasis 1	-10.9242	0.803846	11.7281	0.00500959	0.734505	0.00316351	0.0780667	0.958979	0.105166
Gabrg3	NM_008074	14407	gamma-aminobutyric acid (GABA) A receptor, subunit gamma 3	12.0722	10.4148	-1.65733	0.00448043	0.0102173	0.524317	0.0745213	0.383054	0.718999
Zfp101	NM_009542	22643	zinc finger protein 101	-11.8419	-0.790238	11.0516	0.00548143	0.758375	0.00807665	0.0809084	0.965087	0.116987
Abcg2	NM_011920	26357	ATP-binding cassette, sub-family G (WHITE), member 2	-11.6034	-0.356381	11.247	0.00390463	0.881986	0.00475104	0.0720455	0.992143	0.108954
Olfr164	NM_146451	258443	olfactory receptor 164	12.4364	8.87872	-3.55767	0.00314447	0.0200048	0.194806	0.0673214	0.386911	0.415144
B930007M17Rik	NM_198659	381476	RIKEN cDNA B930007M17 gene	-12.4735	-3.19237	9.28112	0.00415842	0.252391	0.0198213	0.0736205	0.689763	0.146112
Oas1e	NM_145210	231699	2'-5' oligoadenylate synthetase 1E	12.4908	6.27506	-6.21578	0.00437753	0.0869321	0.0563566	0.0743007	0.494121	0.218213
Spata18	NM_178387	73472	spermatogenesis associated 18	-12.5513	-3.14128	9.40999	0.0051545	0.27495	0.0218361	0.078692	0.707106	0.151126
Hapln4	NM_177900	330790	hyaluronan and proteoglycan link protein 4	12.9147	0	-12.9147	0.00288873	1	0.0015506	0.0644722	1	0.103907
Pacrg	NM_027032	69310	PARK2 co-regulated	-9.50891	-5.00986	4.49905	0.00590336	0.071388	0.113976	0.0827761	0.457787	0.312052
Slc41a3	NM_027868	71699	solute carrier family 41, member 3	-12.345	-1.99479	10.3502	0.00340286	0.437802	0.00957942	0.0692005	0.836053	0.119786
Lrrc29	NM_177449	234684	leucine rich repeat containing 29	12.9098	6.47402	-6.43574	0.00328838	0.0769758	0.0480184	0.0685831	0.471248	0.205184
Pygo2	NM_026869	68911	pygopus 2	-12.4144	-2.40921	10.0052	0.00196063	0.326303	0.00797034	0.0564236	0.750015	0.116805
Psmb5	NM_011186	19173	proteasome (prosome, macropain) subunit, beta type 5	-11.3942	0.0239962	11.4182	0.00712072	0.992549	0.00703466	0.0885143	1	0.113692
Ubtd1	NM_145500	226122	ubiquitin domain containing 1	-10.1653	1.68983	11.8551	0.00875442	0.493569	0.00344369	0.0968127	0.854095	0.105471
Traf3ip1	NM_028718	74019	TRAF3 interacting protein 1	-12.3926	-2.61734	9.77522	0.0019078	0.288006	0.00887894	0.0556238	0.719317	0.118263
Muc20	NM_146071	224116	mucin 20	-11.6765	-0.506817	11.1697	0.00485322	0.838599	0.00630533	0.0772603	0.982024	0.112886
Pdhx	NM_175094	27402	pyruvate dehydrogenase complex, component X	-11.8365	-0.958336	10.8782	0.00344907	0.692184	0.00584879	0.0692265	0.948776	0.111349
Tmprss8	NA	NA	NA	-12.5131	-7.23265	5.28041	0.00428011	0.0328849	0.141943	0.0740815	0.39896	0.350038
Zfp39	NM_011758	22698	zinc finger protein 39	-11.6307	-0.498366	11.1323	0.00335789	0.832871	0.00445971	0.069101	0.981117	0.108049
Zfp810	NM_145612	235050	zinc finger protein 810	-11.2522	0.138576	11.3908	0.0049263	0.954169	0.0045647	0.0776789	1	0.108837
Magoh	NM_010760	17149	mago-nashi homolog, proliferation-associated (Drosophila)	-10.7144	0.935088	11.6495	0.0056725	0.694044	0.00332288	0.0815816	0.949238	0.105166
Olfr1022	NM_146589	258582	olfactory receptor 1022	-12.7139	-12.7139	0	0.00481351	0.00262509	1	0.0771386	0.383054	1
Slc32a1	NM_009508	22348	solute carrier family 32 (GABA vesicular transporter), member 1	-12.5043	-6.94156	5.56269	0.00437693	0.0384135	0.124854	0.0743007	0.410024	0.327104
Klhdc9	NM_001033039	68874	kelch domain containing 9	-12.0309	-1.66879	10.3621	0.00701138	0.543964	0.0148608	0.0881564	0.882811	0.134101
Edc3	NM_153799	353190	enhancer of mRNA decapping 3 homolog (S. cerevisiae)	-11.845	-0.966526	10.8784	0.0056686	0.708952	0.0090713	0.0815816	0.95395	0.118767
Sertad4	NM_198247	214791	SERTA domain containing 4	-11.6681	-0.897216	10.7709	0.00496313	0.720492	0.00788062	0.0778088	0.955691	0.116003
Gm7120	NM_001177666	633640	predicted gene 7120	12.387	8.84841	-3.53857	0.00418851	0.0236703	0.211916	0.0736205	0.386911	0.436944
Cnfn	NM_028219	72383	cornifelin	-12.6376	-4.29098	8.34661	0.00646723	0.172838	0.0411805	0.0852163	0.614244	0.192242
Scrn1	NM_027268	69938	secernin 1	-12.1165	-1.47587	10.6406	0.00261811	0.540825	0.00604078	0.0623674	0.881137	0.11228
Col23a1	NM_153393	237759	collagen, type XXIII, alpha 1	12.0889	9.97858	-2.11032	0.00716436	0.0181551	0.454914	0.0887157	0.386911	0.666812
Olfr623	NM_147122	259126	olfactory receptor 623	-12.6817	-7.13345	5.54825	0.00406839	0.0352081	0.126118	0.0733952	0.399779	0.329023
Hectd2	NM_172637	226098	HECT domain containing 2	-12.314	-2.33939	9.97457	0.00371636	0.373227	0.0122825	0.0709489	0.784219	0.127154
Sobp	NM_175407	109205	sine oculis-binding protein homolog (Drosophila)	-11.583	-0.78491	10.7981	0.00563526	0.756606	0.00837229	0.0815234	0.96488	0.117376
Nae1	NM_144931	234664	NEDD8 activating enzyme E1 subunit 1	-11.5255	-0.411176	11.1143	0.00346962	0.861198	0.00439122	0.0692265	0.987185	0.108049
Pik3r4	NM_001081309	75669	phosphatidylinositol 3 kinase, regulatory subunit, polypeptide 4, p150	-10.6973	0.907709	11.605	0.0059043	0.703682	0.00352824	0.0827761	0.950942	0.105473
Cbx6-Nptxr	NA	NA	NA	-10.8659	0.653215	11.5191	0.00539713	0.783669	0.00372744	0.0805318	0.968989	0.106093
Prmt1	NR_045521	15469	protein arginine N-methyltransferase 1	-11.9614	-1.37242	10.589	0.00264871	0.564912	0.00584538	0.0626806	0.891023	0.111349
Rnf113a2	NM_025525	66381	ring finger protein 113A2	-11.098	0.311324	11.4094	0.00849068	0.904137	0.00730589	0.095229	0.996231	0.114605
Pate-dj	NA	NA	NA	12.823	0	-12.823	0.00439215	1	0.00248372	0.0743007	1	0.10513
Pira1	NM_011087	18722	paired-Ig-like receptor A1	-12.6353	-4.32825	8.30707	0.00392467	0.141998	0.0324675	0.0721742	0.572261	0.173179
Tmem204	NM_001001183	407831	transmembrane protein 204	-12.3909	-2.57449	9.81645	0.00356281	0.331329	0.0132963	0.0698729	0.750015	0.129489
Spn	NM_009259	20737	sialophorin	-11.4209	-0.216223	11.2047	0.00419701	0.927906	0.00473121	0.0736205	0.999541	0.108954
Ak1	NM_021515	11636	adenylate kinase 1	-11.8811	-1.00653	10.8745	0.00372067	0.681738	0.0063938	0.0709489	0.94375	0.112886
Clec4d	NM_010819	17474	C-type lectin domain family 4, member d	11.8436	10.6498	-1.19379	0.00561294	0.00999246	0.647631	0.0813328	0.383054	0.814021
Lrig3	NM_177152	320398	leucine-rich repeats and immunoglobulin-like domains 3	-11.7541	-0.930137	10.824	0.00345653	0.69908	0.00580289	0.0692265	0.950309	0.111349
Nfkbil2	NA	NA	NA	-12.1141	-1.68463	10.4294	0.00581896	0.531649	0.0127977	0.0822006	0.875943	0.128879
Edar	NM_010100	13608	ectodysplasin-A receptor	12.3567	7.6084	-4.74833	0.00473677	0.0460247	0.118972	0.0766556	0.422516	0.319315
Decr2	NM_011933	26378	2-4-dienoyl-Coenzyme A reductase 2, peroxisomal	-12.4419	-3.09793	9.34398	0.00198196	0.22132	0.0119517	0.0567734	0.664611	0.127154
Slc22a4	NM_019687	30805	solute carrier family 22 (organic cation transporter), member 4	12.1229	9.87946	-2.2434	0.00509541	0.0149447	0.407691	0.0782415	0.386911	0.624181
Slc25a36	NM_138756	192287	solute carrier family 25, member 36	-11.2873	0.00726308	11.2946	0.00426773	0.997555	0.00424732	0.0740815	1	0.107937
Cacna1g	NM_009783	12291	calcium channel, voltage-dependent, T type, alpha 1G subunit	-12.615	-5.12992	7.48508	0.00418997	0.096432	0.0499192	0.0736205	0.508444	0.208412
Ppie	NM_019489	56031	peptidylprolyl isomerase E (cyclophilin E)	-11.569	-0.629867	10.9391	0.00700843	0.808995	0.00946071	0.0881564	0.975374	0.119786
Myo5b	NM_201600	17919	myosin VB	-11.0749	0.301986	11.3769	0.00505933	0.899419	0.00427221	0.0782262	0.995128	0.107937
Apobec4	NM_001081197	71281	apolipoprotein B mRNA editing enzyme, catalytic polypeptide-like 4 (putative)	-12.6286	-6.87976	5.74884	0.0060451	0.050831	0.126161	0.083303	0.426164	0.329089
Pcdhb18	NM_053143	93889	protocadherin beta 18	-12.3345	-2.70117	9.63332	0.002922	0.296881	0.0125497	0.0647071	0.727199	0.128399
Klhl25	NM_182782	207952	kelch-like 25 (Drosophila)	-12.0227	-1.73557	10.2871	0.00549058	0.513974	0.0126445	0.0809084	0.865104	0.128819
Suox	NM_173733	211389	sulfite oxidase	-11.946	-1.4897	10.4563	0.00384211	0.551838	0.00846463	0.071355	0.886265	0.117825
Zfp11	NM_172462	22648	zinc finger protein 11	-11.762	-0.967617	10.7944	0.00435427	0.696768	0.00724457	0.0743007	0.949937	0.114605
Apol7c	NM_175391	108956	apolipoprotein L 7c	12.5369	6.80137	-5.73552	0.00295139	0.059334	0.0590903	0.0649867	0.439419	0.22421
Rsph1	NM_025290	22092	radial spoke head 1 homolog (Chlamydomonas)	-12.6191	-8.11007	4.50902	0.00417212	0.0216314	0.200479	0.0736205	0.386911	0.421295
Mrpl13	NM_026759	68537	mitochondrial ribosomal protein L13	-11.5305	-0.522332	11.0082	0.00373872	0.826136	0.00501577	0.0710318	0.980485	0.109949
Gatsl3	NM_028022	71962	GATS protein-like 3	-12.4015	-4.36436	8.03715	0.0047066	0.143019	0.038374	0.0763671	0.572561	0.186031
Ttc25	NM_028918	74407	tetratricopeptide repeat domain 25	-12.494	-3.34526	9.14875	0.00442292	0.237945	0.0221046	0.0743007	0.675652	0.151572
Nod2	NM_145857	257632	nucleotide-binding oligomerization domain containing 2	-11.1704	-0.127936	11.0424	0.00833653	0.960594	0.00886015	0.0947597	1	0.118263
Pex5	NM_175933	19305	peroxisomal biogenesis factor 5	-11.3329	-0.192533	11.1403	0.00781583	0.940862	0.00856516	0.0921114	1	0.117927
4930452B06Rik	NM_028934	74430	RIKEN cDNA 4930452B06 gene	-12.3968	-5.24905	7.14778	0.00251934	0.0677429	0.0466085	0.0618571	0.453777	0.202801
Dlec1	NM_177117	320256	deleted in lung and esophageal cancer 1	-12.5831	-12.5831	0	0.00259386	0.00127168	0.999565	0.0621254	0.383054	1
5830432E09Rik	NR_015548	67765	RIKEN cDNA 5830432E09 gene	11.4671	10.9532	-0.513881	0.00808885	0.0102406	0.846555	0.093432	0.383054	0.94157
Fndc1	NM_001081416	68655	fibronectin type III domain containing 1	12.0985	10.461	-1.63748	0.00600761	0.0127579	0.546128	0.0831568	0.383054	0.737253
Bbs7	NM_027810	71492	Bardet-Biedl syndrome 7 (human)	-12.2955	-3.55275	8.74272	0.00347021	0.194573	0.022229	0.0692265	0.641277	0.151801
1810032O08Rik	NR_027821	66293	RIKEN cDNA 1810032O08 gene	-11.3504	-0.252409	11.098	0.00783509	0.922669	0.00883207	0.0921114	0.999032	0.118263
Avpi1	NM_027106	69534	arginine vasopressin-induced 1	12.1537	9.42608	-2.72758	0.0054706	0.0197306	0.329018	0.0809084	0.386911	0.553392
Rae1	NM_175112	66679	RAE1 RNA export 1 homolog (S. pombe)	-12.0779	-1.7924	10.2855	0.00253112	0.458771	0.00708586	0.0619333	0.840262	0.114054
Tcfap2e	NA	NA	NA	12.3444	4.50723	-7.8372	0.00634352	0.204723	0.0317538	0.0847224	0.654732	0.171386
Avpr1a	NM_016847	54140	arginine vasopressin receptor 1A	12.7556	7.15017	-5.60538	0.00561967	0.0658377	0.0919035	0.0813669	0.45057	0.280868
Pdcl3	NM_026850	68833	phosducin-like 3	-11.1754	0.0607503	11.2361	0.0050958	0.979873	0.00492628	0.0782415	1	0.109642
Plcd3	NM_152813	72469	phospholipase C, delta 3	12.0717	9.84455	-2.22711	0.00546577	0.0157194	0.413836	0.0809084	0.386911	0.629954
Fam160a1	NM_172682	229488	family with sequence similarity 160, member A1	-11.6004	-0.643522	10.9569	0.00554364	0.79883	0.00767134	0.0810884	0.97255	0.115027
Osbpl7	NM_001081434	71240	oxysterol binding protein-like 7	-11.629	-0.821564	10.8074	0.00406317	0.735406	0.00635712	0.0733952	0.958979	0.112886
Tctn2	NM_026486	67978	tectonic family member 2	-12.1124	-1.96019	10.1522	0.0025581	0.422072	0.00783127	0.0620518	0.82728	0.115791
Rnf141	NM_025999	67150	ring finger protein 141	-12.4943	-4.16566	8.32862	0.00188949	0.116669	0.0214638	0.0554083	0.532843	0.14998
Cyp11b1	NM_001033229	110115	cytochrome P450, family 11, subfamily b, polypeptide 1	-12.3824	-12.3824	0	0.00614053	0.0033933	1	0.0836045	0.383054	1
Amotl2	NM_019764	56332	angiomotin-like 2	-12.002	-1.83869	10.1633	0.00408454	0.472534	0.0106095	0.0733952	0.847784	0.122785
Tyms	NR_033402	22171	thymidylate synthase	-12.0006	-1.82872	10.1719	0.00570777	0.494619	0.0136658	0.0818	0.854164	0.130419
Pxt1	NM_153390	69307	peroxisomal, testis specific 1	-12.5758	-8.81642	3.75938	0.00545811	0.0189467	0.279788	0.0809084	0.386911	0.501984
Ccdc45	NM_177088	320162	coiled-coil domain containing 45	-10.5299	0.857012	11.3869	0.00758043	0.725608	0.00475763	0.0908405	0.95707	0.108954
Bphl	NM_026512	68021	biphenyl hydrolase-like (serine hydrolase, breast epithelial mucin-associated antigen)	-11.7083	-0.95716	10.7512	0.00364148	0.691924	0.00618492	0.0705091	0.948625	0.112553
Moap1	NM_022323	64113	modulator of apoptosis 1	-11.6205	-0.715905	10.9046	0.00443459	0.770515	0.00649568	0.0743007	0.966639	0.112886
Tmub1	NM_022418	64295	transmembrane and ubiquitin-like domain containing 1	-11.6179	-0.785918	10.832	0.00433523	0.748256	0.00661101	0.0743007	0.963012	0.112886
Cerkl	NM_001048176	228094	ceramide kinase-like	-11.6817	-0.733229	10.9485	0.00443699	0.766201	0.00653822	0.0743007	0.966319	0.112886
4930451I11Rik	NM_183131	78118	RIKEN cDNA 4930451I11 gene	-12.3565	-12.3565	0	0.00625495	0.00345993	1	0.0839972	0.383054	1
2310011J03Rik	NM_025521	66374	RIKEN cDNA 2310011J03 gene	-11.8505	-1.11597	10.7345	0.00381102	0.650383	0.00694102	0.071355	0.930723	0.113575
Sez6	NM_021286	20370	seizure related gene 6	-12.06	-2.22546	9.83458	0.00301479	0.374334	0.0103492	0.0657203	0.784868	0.122092
Ndufa6	NM_025987	67130	NADH dehydrogenase (ubiquinone) 1 alpha subcomplex, 6 (B14)	-11.5087	-0.581959	10.9268	0.00413775	0.809013	0.0057021	0.0736205	0.975374	0.111349
Gm6377	NM_001037917	622976	predicted gene 6377	-12.2898	-3.5832	8.70656	0.0049086	0.211609	0.0275441	0.0775434	0.659764	0.162899
Gsto2	NM_030051	68214	glutathione S-transferase omega 2	12.2437	8.22073	-4.02294	0.00372154	0.0293386	0.155124	0.0709489	0.393529	0.364835
Polr3c	NM_028925	74414	polymerase (RNA) III (DNA directed) polypeptide C	-10.7742	0.600036	11.3742	0.00637497	0.804025	0.00458482	0.0847652	0.974745	0.108858
Svep1	NM_022814	64817	sushi, von Willebrand factor type A, EGF and pentraxin domain containing 1	-12.0387	-2.24067	9.79803	0.00340746	0.378063	0.0114361	0.0692005	0.788495	0.125299
Zfp9	NM_011763	22750	zinc finger protein 9	-11.297	-0.264119	11.0329	0.007938	0.918946	0.00900253	0.0926699	0.998425	0.118726
2410015M20Rik	NM_153152	224904	RIKEN cDNA 2410015M20 gene	-10.9619	0.260333	11.2222	0.0064419	0.915438	0.0056064	0.085046	0.998425	0.111349
Samd1	NM_001081415	666704	sterile alpha motif domain containing 1	-12.4282	-3.74391	8.6843	0.00482064	0.198034	0.0286044	0.0771386	0.64728	0.164379
Ppp1r12b	NR_015606	329251	protein phosphatase 1, regulatory (inhibitor) subunit 12B	11.2366	10.9107	-0.325869	0.00488203	0.00582402	0.892981	0.077387	0.383054	0.968352
Commd9	NM_029635	76501	COMM domain containing 9	-10.5318	1.00883	11.5407	0.00759082	0.680491	0.00438916	0.0908405	0.943689	0.108049
Rab30	NM_029494	75985	RAB30, member RAS oncogene family	-11.3798	-0.46109	10.9187	0.00424395	0.847009	0.00548715	0.0739234	0.984112	0.1113
Cyp2j13	NM_145548	230459	cytochrome P450, family 2, subfamily j, polypeptide 13	12.2664	0	-12.2664	0.00638684	1	0.00366925	0.0848175	1	0.106093
Olfr98	NM_146510	258503	olfactory receptor 98	12.2642	5.89474	-6.36946	0.00504317	0.105284	0.0533952	0.0782262	0.517536	0.213533
Mir291b	NR_030276	100124471	microRNA 291b	-12.5258	-12.5258	0	0.00553326	0.0030405	1	0.0810002	0.383054	1
Tbr1	NM_009322	21375	T-box brain gene 1	-11.8158	-1.44918	10.3666	0.00642116	0.585869	0.0127552	0.0849296	0.903292	0.128879
Rabggta	NM_019519	56187	Rab geranylgeranyl transferase, a subunit	-12.0303	-2.10817	9.92209	0.00387125	0.412037	0.011698	0.0717519	0.819475	0.126611
Clec2g	NM_027562	70809	C-type lectin domain family 2, member g	-12.5186	-6.6246	5.89396	0.00636838	0.0570548	0.118151	0.0847652	0.437526	0.317817
Dnpep	NM_016878	13437	aspartyl aminopeptidase	-11.9409	-1.81105	10.1299	0.00596762	0.499555	0.0141214	0.0830991	0.856583	0.131613
5830433M19Rik	NM_026368	67770	RIKEN cDNA 5830433M19 gene	-11.9692	-1.51017	10.459	0.00404177	0.549909	0.00889204	0.0731935	0.885208	0.118263
Efcab1	NM_025769	66793	EF hand calcium binding domain 1	-12.2771	-2.93914	9.33795	0.00651056	0.31038	0.0242564	0.0854327	0.739952	0.155695
1110038D17Rik	NM_175133	68778	RIKEN cDNA 1110038D17 gene	-11.2369	-0.109511	11.1273	0.00836842	0.966453	0.00881196	0.0948898	1	0.118263
C78339	NM_001033192	97863	expressed sequence C78339	-12.1444	-2.3657	9.77872	0.00268547	0.343446	0.0101698	0.0628597	0.761605	0.121982
Elavl2	NM_207686	15569	ELAV (embryonic lethal, abnormal vision, Drosophila)-like 2 (Hu antigen B)	12.2379	6.98945	-5.24845	0.00528434	0.0633968	0.0948919	0.0796814	0.44431	0.285013
Cideb	NM_009894	12684	cell death-inducing DNA fragmentation factor, alpha subunit-like effector B	-11.4998	-0.690637	10.8092	0.00442687	0.776368	0.0064401	0.0743007	0.967458	0.112886
Polr1e	NM_022811	64424	polymerase (RNA) I polypeptide E	11.6159	10.8836	-0.732293	0.00343794	0.00518608	0.759028	0.0692265	0.383054	0.889967
1700001O22Rik	NR_028487	73598	RIKEN cDNA 1700001O22 gene	-12.4965	-9.10937	3.38713	0.00573339	0.0167651	0.321936	0.0818837	0.386911	0.544887
Thop1	NM_022653	50492	thimet oligopeptidase 1	11.7703	10.3214	-1.44883	0.00406881	0.00876412	0.562732	0.0733952	0.383054	0.750714
Usp29	NM_021323	57775	ubiquitin specific peptidase 29	-12.1207	-2.72602	9.39473	0.00550954	0.326114	0.0201731	0.0809084	0.750015	0.146787
Slc19a2	NM_054087	116914	solute carrier family 19 (thiamine transporter), member 2	-10.7693	0.579489	11.3487	0.00764589	0.81557	0.0056494	0.0911512	0.977	0.111349
Ggct	NM_026637	110175	gamma-glutamyl cyclotransferase	-11.1084	-0.104275	11.0041	0.00895121	0.968087	0.0094008	0.0975072	1	0.119765
Fzr1	NM_019757	56371	fizzy/cell division cycle 20 related 1 (Drosophila)	-11.9029	-1.44247	10.4604	0.00416394	0.566995	0.00885163	0.0736205	0.891475	0.118263
Ubash3a	NM_177823	328795	ubiquitin associated and SH3 domain containing, A	-12.2691	-9.89297	2.37612	0.00659796	0.012463	0.461618	0.0857858	0.383054	0.669314
Umodl1	NM_177465	52020	uromodulin-like 1	12.5994	7.46539	-5.13402	0.00441944	0.0502668	0.0999403	0.0743007	0.424226	0.293388
U2af1l4	NM_170760	233073	U2 small nuclear RNA auxiliary factor 1-like 4	-11.7888	-1.51323	10.2756	0.00531348	0.558878	0.0113173	0.0798389	0.889852	0.124894
Znhit2	NA	NA	NA	-11.5837	-0.739775	10.844	0.00438444	0.762222	0.00652618	0.0743007	0.96548	0.112886
Bckdhb	NM_199195	12040	branched chain ketoacid dehydrogenase E1, beta polypeptide	-11.7694	-1.23582	10.5335	0.00379473	0.614451	0.00743296	0.071355	0.912987	0.11461
Bat5	NA	NA	NA	-12.1248	-2.27757	9.84727	0.00281242	0.362241	0.0100325	0.063586	0.778953	0.121416
Prdm8	NM_029947	77630	PR domain containing 8	12.188	5.65061	-6.53736	0.00347214	0.106985	0.0379677	0.0692265	0.520266	0.185257
Tcf7	NM_009331	21414	transcription factor 7, T-cell specific	-11.7119	-1.27909	10.4328	0.0042002	0.605844	0.00832836	0.0736205	0.91033	0.117345
Igsf5	NM_028078	72058	immunoglobulin superfamily, member 5	-12.3252	-3.76671	8.55844	0.0056793	0.202965	0.0324137	0.0815938	0.651888	0.173117
Crem	NM_013498	12916	cAMP responsive element modulator	-11.0864	-0.0889032	10.9975	0.00493462	0.970213	0.0051834	0.0776789	1	0.111103
Snrnp27	NM_025665	66618	small nuclear ribonucleoprotein 27 (U4/U6.U5)	-11.1204	-0.0221914	11.0982	0.00459644	0.992509	0.00465129	0.0754369	1	0.108874
Matn2	NM_016762	17181	matrilin 2	-10.9006	0.139142	11.0397	0.00575639	0.95374	0.00532514	0.0819408	1	0.11111
Cyp3a57	NM_001100180	622127	cytochrome P450, family 3, subfamily a, polypeptide 57	12.0416	9.24574	-2.79582	0.00559231	0.0210737	0.316381	0.0812877	0.386911	0.539711
Hars	NM_008214	15115	histidyl-tRNA synthetase	-11.0331	0.107494	11.1406	0.00479734	0.963697	0.00450951	0.0771386	1	0.108322
Apln	NM_013912	30878	apelin	-10.7396	0.55961	11.2992	0.00587145	0.814193	0.00427897	0.0826277	0.976531	0.107937
Cnih3	NM_028408	72978	cornichon homolog 3 (Drosophila)	-10.6232	0.595859	11.219	0.00879697	0.812381	0.0064794	0.0969389	0.97614	0.112886
Pdss2	NM_027772	71365	prenyl (solanesyl) diphosphate synthase, subunit 2	-11.3908	-0.643217	10.7476	0.00419435	0.788081	0.00600676	0.0736205	0.969922	0.11228
Trim17	NM_031172	56631	tripartite motif-containing 17	-12.093	-2.89379	9.19916	0.00432568	0.28388	0.0188068	0.0743007	0.714977	0.143719
Acad11	NM_175324	102632	acyl-Coenzyme A dehydrogenase family, member 11	-12.1944	-3.18781	9.00657	0.00246184	0.214024	0.0152228	0.061286	0.660707	0.135032
Wdr53	NM_026898	68980	WD repeat domain 53	-10.8764	0.315012	11.1914	0.00584923	0.895632	0.00491119	0.0824399	0.995128	0.109569
Matk	NM_010768	17179	megakaryocyte-associated tyrosine kinase	12.4724	6.39418	-6.07819	0.00200558	0.0648622	0.0387067	0.0571488	0.447906	0.186665
Cd69	NM_001033122	12515	CD69 antigen	-12.218	-7.36443	4.85355	0.00436617	0.0281052	0.168308	0.0743007	0.393529	0.38127
Hs6st2	NM_015819	50786	heparan sulfate 6-O-sulfotransferase 2	-11.7946	-1.41842	10.3762	0.00769944	0.602841	0.0146181	0.0914962	0.909337	0.133603
Naalad2	NM_028279	72560	N-acetylated alpha-linked acidic dipeptidase 2	-12.284	-3.13479	9.14918	0.00503403	0.266262	0.0225162	0.0782262	0.700311	0.152333
Nptxr	NM_030689	73340	neuronal pentraxin receptor	-10.7645	0.452344	11.2169	0.00589384	0.849568	0.00456762	0.0827761	0.984901	0.108837
Ak5	NM_001081277	229949	adenylate kinase 5	-12.0472	-2.67297	9.3742	0.00577015	0.335357	0.0205322	0.0819783	0.753694	0.147386
Mc2r	NM_008560	17200	melanocortin 2 receptor	12.1597	0	-12.1597	0.00507231	1	0.00279381	0.0782262	1	0.10513
Kdm4b	NM_172132	193796	lysine (K)-specific demethylase 4B	-11.8796	-1.96096	9.91862	0.00317631	0.426755	0.00953492	0.0676907	0.829857	0.119786
Esm1	NM_023612	71690	endothelial cell-specific molecule 1	-10.9181	-0.0272329	10.8909	0.00865052	0.991494	0.00876239	0.0961195	1	0.118263
Cdk20	NM_053180	105278	cyclin-dependent kinase 20	-11.6982	-1.32797	10.3702	0.00692743	0.61755	0.0129516	0.0877727	0.914132	0.129033
Haus8	NM_029621	76478	4HAUS augmin-like complex, subunit 8	-11.9741	-1.8647	10.1094	0.00334491	0.454313	0.00926928	0.069101	0.83684	0.119231
Bace2	NM_019517	56175	beta-site APP-cleaving enzyme 2	-11.2846	-0.431913	10.8527	0.00463993	0.857253	0.00589017	0.0758155	0.986815	0.111611
Capn1	NM_007600	12333	calpain 1	-11.2255	-0.273648	10.9518	0.00445516	0.908257	0.00519478	0.0743007	0.996852	0.111103
Calb2	NM_007586	12308	calbindin 2	-12.0633	-3.2005	8.86276	0.00625953	0.265463	0.0277279	0.0839972	0.700311	0.163252
Gm962	NM_001033448	381201	predicted gene 962	-11.134	-0.134232	10.9998	0.00862597	0.958769	0.00919362	0.096077	1	0.119004
Slitrk6	NM_175499	239250	SLIT and NTRK-like family, member 6	12.1348	0	-12.1348	0.0068513	1	0.00394115	0.0871747	1	0.106402
Tktl1	NM_031379	83553	transketolase-like 1	12.0622	7.95765	-4.1045	0.00667327	0.0430944	0.17697	0.08637	0.415152	0.392591
B3galt6	NM_080445	117592	UDP-Gal:betaGal beta 1,3-galactosyltransferase, polypeptide 6	-11.5689	-1.12194	10.447	0.00774714	0.674059	0.0130473	0.0917107	0.940672	0.129033
BC022687	NM_145450	217887	cDNA sequence BC022687	-12.2764	-3.72351	8.55294	0.00306987	0.170262	0.0228568	0.0662219	0.612127	0.153003
Ftsjd1	NM_146215	234728	FtsJ methyltransferase domain containing 1	-12.1411	-4.58411	7.55697	0.0065783	0.139675	0.0533814	0.0856441	0.56817	0.213533
Enpp7	NM_001030291	238011	ectonucleotide pyrophosphatase/phosphodiesterase 7	12.1137	0	-12.1137	0.00486924	1	0.00265588	0.077387	1	0.10513
Ube2o	NM_173755	217342	ubiquitin-conjugating enzyme E2O	-11.0823	-0.0976727	10.9847	0.00879999	0.969967	0.00921726	0.0969389	1	0.119033
Lysmd2	NM_027309	70082	LysM, putative peptidoglycan-binding, domain containing 2	-11.9962	-2.52366	9.47256	0.0028691	0.314165	0.0119643	0.0642415	0.743949	0.127154
4930588N13Rik	NM_029464	75860	RIKEN cDNA 4930588N13 gene	12.5405	0	-12.5405	0.0054719	1	0.00313176	0.0809084	1	0.105166
Tsga14	NM_031998	83922	testis specific gene A14	-11.5547	-0.869735	10.6849	0.0072121	0.740278	0.0108926	0.0889085	0.960642	0.124097
Rps6kl1	NM_146244	238323	ribosomal protein S6 kinase-like 1	-12.0499	-3.22865	8.82122	0.00623446	0.261078	0.0280881	0.0839972	0.700311	0.163593
Mrgpra1	NM_153095	233221	MAS-related GPR, member A1	-12.3647	-8.16426	4.20043	0.00709312	0.0295881	0.242423	0.0885143	0.393529	0.465775
Fam55c	NM_001134457	385658	family with sequence similarity 55, member C	12.072	10.0943	-1.97768	0.00399561	0.0109994	0.445179	0.0727122	0.383054	0.661681
Foxd1	NM_008242	15229	forkhead box D1	12.1011	2.37621	-9.7249	0.00689933	0.455242	0.013519	0.087656	0.837067	0.130088
Fam154b	NM_177894	330577	family with sequence similarity 154, member B	-12.3554	-7.09406	5.26136	0.00370419	0.0303366	0.137291	0.0709489	0.393529	0.343868
Lefty1	NM_010094	13590	left right determination factor 1	-12.1486	-4.61595	7.53269	0.00577143	0.130354	0.0509223	0.0819783	0.556507	0.209613
Lama5	NM_001081171	16776	laminin, alpha 5	-11.617	-1.32224	10.2947	0.00696859	0.617322	0.013069	0.087899	0.914132	0.129033
A530013C23Rik	NR_015500	329562	RIKEN cDNA A530013C23 gene	-12.3565	-9.98003	2.37651	0.00653071	0.0123238	0.461998	0.0855249	0.383054	0.669499
Vipr2	NM_009511	22355	vasoactive intestinal peptide receptor 2	-12.0818	-3.93368	8.14811	0.00618406	0.185472	0.0387687	0.0838484	0.631835	0.18677
Card10	NM_130859	105844	caspase recruitment domain family, member 10	11.8348	9.35457	-2.48023	0.00835345	0.0247037	0.389472	0.0947779	0.390255	0.605527
G6pc	NM_008061	14377	glucose-6-phosphatase, catalytic	12.5145	5.62508	-6.88947	0.00651327	0.130901	0.0526029	0.0854327	0.557305	0.212191
Gpr25	NM_001101516	383563	G protein-coupled receptor 25	12.114	9.80279	-2.31116	0.00589944	0.0171847	0.404209	0.0827761	0.386911	0.620539
Gm11437	NM_001037932	628813	predicted gene 11437	11.048	10.8514	-0.196605	0.0066045	0.0073018	0.937127	0.0857892	0.383054	0.991049
Slc25a33	NM_027460	70556	solute carrier family 25, member 33	-11.3504	-0.829181	10.5213	0.00843537	0.754013	0.0124217	0.0950381	0.96488	0.12774
Cacng3	NM_019430	54376	calcium channel, voltage-dependent, gamma subunit 3	-12.136	-12.136	0	0.00718849	0.00399907	1	0.0888959	0.383054	1
2810021G02Rik	NA	NA	NA	-12.2568	-4.25268	8.00409	0.00357187	0.133426	0.032986	0.0698729	0.560329	0.175039
Akr1c21	NM_029901	77337	aldo-keto reductase family 1, member C21	12.0741	4.98421	-7.08988	0.00794441	0.172304	0.0485023	0.0926864	0.614173	0.205924
2010300C02Rik	NM_028096	72097	RIKEN cDNA 2010300C02 gene	-12.2642	-4.55253	7.71164	0.00258207	0.0993676	0.0333315	0.0620833	0.509825	0.175767
Catsperb	NM_173023	271036	cation channel, sperm-associated, beta	-12.0903	-4.69924	7.39109	0.00487522	0.115183	0.0501259	0.077387	0.530792	0.208761
Scnm1	NM_027013	69269	sodium channel modifier 1	-11.2609	-0.405036	10.8558	0.00491295	0.866845	0.00612853	0.0775461	0.988413	0.112529
BC067068	NM_207522	216292	cDNA sequence BC067068	-11.0356	-0.139596	10.896	0.00607576	0.954441	0.00654314	0.0833073	1	0.112886
Hnf1b	NM_009330	21410	HNF1 homeobox B	-12.1105	-4.61096	7.49949	0.0056739	0.128879	0.0509675	0.0815816	0.55492	0.209676
LOC106740	NR_027905	106740	hypothetical LOC106740	-11.6141	-1.22447	10.3897	0.00469739	0.62371	0.00895861	0.0762843	0.917156	0.118524
Myh7	NM_080728	140781	myosin, heavy polypeptide 7, cardiac muscle, beta	-11.8997	-2.42074	9.47898	0.00625957	0.379053	0.0196935	0.0839972	0.78955	0.145899
Fam101b	NM_029658	76566	family with sequence similarity 101, member B	-11.0679	-0.184795	10.8831	0.00545657	0.938936	0.00603465	0.0809084	1	0.11228
Bco2	NM_133217	170752	beta-carotene oxygenase 2	12.2613	3.88166	-8.37963	0.0023625	0.238305	0.0105703	0.0601545	0.676363	0.122785
Cd80	NM_009855	12519	CD80 antigen	-11.5829	-1.05488	10.528	0.0072611	0.689543	0.0119441	0.0889252	0.947815	0.127154
Cnih2	NM_009920	12794	cornichon homolog 2 (Drosophila)	-12.0524	-3.44183	8.61062	0.00324435	0.195511	0.0213647	0.0682139	0.643013	0.149906
Wdr20b	NM_027614	70948	WD repeat domain 20b	-12.179	-8.1203	4.05873	0.00349779	0.0156581	0.232267	0.0694396	0.386911	0.456202
Pcdhb19	NM_053144	93890	protocadherin beta 19	-11.5142	-1.12066	10.3936	0.00594508	0.660968	0.0104441	0.0830343	0.934488	0.122492
Galnt5	NM_172855	241391	UDP-N-acetyl-alpha-D-galactosamine:polypeptide N-acetylgalactosaminyltransferase 5	-11.938	-3.02757	8.91044	0.00654022	0.287551	0.0268808	0.0855249	0.718963	0.16132
Fcrlb	NM_001029984	435653	Fc receptor-like B	12.0242	4.50926	-7.51494	0.00574566	0.198644	0.0310444	0.0819311	0.647796	0.17004
Olfr111	NM_001005485	545205	olfactory receptor 111	11.9794	8.46675	-3.51268	0.00574692	0.030616	0.222378	0.0819311	0.393529	0.448179
Prkrip1	NM_025774	66801	Prkr interacting protein 1 (IL11 inducible)	-11.5499	-1.04238	10.5075	0.00518067	0.677759	0.00889521	0.0787037	0.942576	0.118263
Alkbh4	NM_028070	72041	alkB, alkylation repair homolog 4 (E. coli)	-12.0479	-3.07672	8.97116	0.00285204	0.231877	0.0161591	0.0641316	0.667819	0.136679
Tinf2	NM_145705	28113	Terf1 (TRF1)-interacting nuclear factor 2	-11.098	-0.415412	10.6826	0.00929131	0.874215	0.0112911	0.0998063	0.990187	0.12484
Sgtb	NM_144838	218544	small glutamine-rich tetratricopeptide repeat (TPR)-containing, beta	-10.2843	0.828688	11.113	0.0079962	0.730924	0.00503485	0.0929856	0.95877	0.109949
Clec4b2	NM_001004159	381809	C-type lectin domain family 4, member b2	12.4398	0	-12.4398	0.0061366	1	0.00354637	0.0836045	1	0.105473
Slc35e4	NM_153142	103710	solute carrier family 35, member E4	-12.0342	-3.1242	8.91002	0.00269756	0.222098	0.016103	0.0630303	0.664611	0.136424
Pcyox1l	NM_172832	240334	prenylcysteine oxidase 1 like	-12.0043	-2.58183	9.42243	0.00313547	0.309896	0.0131059	0.0672839	0.739518	0.129033
Scnn1b	NM_011325	20277	sodium channel, nonvoltage-gated 1 beta	11.8978	8.39149	-3.50626	0.00792825	0.0373423	0.242545	0.0926494	0.405595	0.465914
Dph5	NM_027193	69740	DPH5 homolog (S. cerevisiae)	-11.0572	-0.262687	10.7945	0.00711398	0.916547	0.00813123	0.0885143	0.998425	0.117274
Mir346	NR_029774	723847	microRNA 346	12.4336	0	-12.4336	0.00616808	1	0.00356572	0.0836929	1	0.105473
Gli1	NM_010296	14632	GLI-Kruppel family member GLI1	11.8261	9.30483	-2.52122	0.00615007	0.0203967	0.360468	0.0836045	0.386911	0.581034
Stk33	NM_054103	117229	serine/threonine kinase 33	-11.8113	-1.99999	9.81133	0.00531307	0.447405	0.0144163	0.0798389	0.836053	0.133056
Gm11346	NR_024599	76024	X-linked lymphocyte-regulated 5 pseudogene	-12.0632	-9.97726	2.08598	0.00726607	0.0118094	0.49799	0.0889252	0.383054	0.695799
Fzd5	NM_022721	14367	frizzled homolog 5 (Drosophila)	-11.0342	-0.23854	10.7956	0.00925655	0.927095	0.0103626	0.0996058	0.999541	0.122128
Tsta3	NM_031201	22122	tissue specific transplantation antigen P35B	-10.3248	0.924432	11.2493	0.00824133	0.704132	0.00496029	0.0942463	0.951043	0.109949
Higd1a	NM_019814	56295	HIG1 domain family, member 1A	-11.9231	-2.73583	9.18732	0.00297602	0.279081	0.0140385	0.0650658	0.710556	0.131373
B3gnt4	NM_198611	231727	UDP-GlcNAc:betaGal beta-1,3-N-acetylglucosaminyltransferase 4	-11.5761	-1.44355	10.1325	0.00439875	0.560616	0.00958498	0.0743007	0.889945	0.119786
4930474N05Rik	NM_175008	218921	RIKEN cDNA 4930474N05 gene	-12.2345	-4.88194	7.35255	0.00848062	0.137487	0.0665575	0.095229	0.566114	0.23841
Amy1	NM_007446	11722	amylase 1, salivary	11.9926	2.08598	-9.90659	0.00723555	0.49165	0.0121914	0.0889252	0.853217	0.127154
Purg	NM_152821	75029	purine-rich element binding protein G	-11.418	-1.08221	10.3358	0.0040002	0.652063	0.00736536	0.0727244	0.931601	0.114605
Zfp735	NM_001126489	76390	zinc finger protein 735	11.9873	6.98568	-5.00161	0.00899535	0.0750129	0.129688	0.0978732	0.467841	0.333885
Slc39a4	NM_028064	72027	solute carrier family 39 (zinc transporter), member 4	11.7151	10.1844	-1.53072	0.0032143	0.00762844	0.527822	0.0681245	0.383054	0.721567
Dach1	NM_007826	13134	dachshund 1 (Drosophila)	-11.9011	-2.51097	9.39016	0.00316699	0.319122	0.0129286	0.0675878	0.748301	0.129033
Bcl11a	NM_016707	14025	B-cell CLL/lymphoma 11A (zinc finger protein)	-11.7801	-2.49815	9.28199	0.00428823	0.336335	0.0161135	0.0740815	0.754316	0.13645
Gm428	NM_001081644	242502	predicted gene 428	-12.2404	-7.25611	4.98428	0.00778385	0.0455359	0.177877	0.0919693	0.421925	0.393942
Akr1d1	NM_145364	208665	aldo-keto reductase family 1, member D1	12.4013	5.17206	-7.2292	0.00545524	0.151698	0.0387373	0.0809084	0.583331	0.186689
Gtpbp3	NM_032544	70359	GTP binding protein 3	-11.4209	-1.11094	10.3099	0.00447574	0.648712	0.00823167	0.0745213	0.930286	0.117345
Npl	NM_028749	74091	N-acetylneuraminate pyruvate lyase	11.4807	10.1333	-1.34733	0.00552578	0.0109857	0.597339	0.0809546	0.383054	0.7776
Sphk1	NM_025367	20698	sphingosine kinase 1	11.9688	0	-11.9688	0.00765485	1	0.00442583	0.0911512	1	0.108049
Pla2g4f	NM_001024145	271844	phospholipase A2, group IVF	11.9283	7.58559	-4.34267	0.00640281	0.0487652	0.151765	0.0848921	0.423787	0.360884
Pigr	NM_011082	18703	polymeric immunoglobulin receptor	11.4535	9.97417	-1.47934	0.0080073	0.0158926	0.583466	0.0930014	0.386911	0.766847
Sox3	NM_009237	20675	SRY-box containing gene 3	11.9661	0	-11.9661	0.00763424	1	0.00441127	0.0910712	1	0.108049
Hspb3	NM_019960	56534	heat shock protein 3	12.3898	3.25777	-9.13203	0.00651722	0.33733	0.0187134	0.0854327	0.755748	0.143719
Rxfp4	NM_181817	242093	relaxin family peptide receptor 4	11.9527	7.86036	-4.09236	0.00594129	0.0414501	0.167685	0.0830343	0.411871	0.38051
Atp4b	NM_009724	11945	ATPase, H+/K+ exchanging, beta polypeptide	-12.2008	-12.2008	0	0.00389368	0.00197084	0.999633	0.071915	0.383054	1
Wfdc16	NM_001012723	277345	WAP four-disulfide core domain 16	-12.0172	-12.0172	0	0.0078345	0.00438028	1	0.0921114	0.383054	1
Hcrtr1	NM_198959	230777	hypocretin (orexin) receptor 1	12.184	8.88758	-3.29646	0.00294199	0.0177199	0.212982	0.0649867	0.386911	0.438532
Cdk5r1	NM_009871	12569	cyclin-dependent kinase 5, regulatory subunit 1 (p35)	-11.0968	-0.421121	10.6757	0.00649938	0.865354	0.00808944	0.0853797	0.987506	0.117035
Setd4	NM_145482	224440	SET domain containing 4	-12.0034	-5.96534	6.03804	0.00712025	0.0727404	0.107703	0.0885143	0.461542	0.303413
Snrnp40	NM_025645	66585	small nuclear ribonucleoprotein 40 (U5)	-10.8	0.0925202	10.8925	0.00641586	0.969469	0.00609597	0.0849296	1	0.112479
Rrh	NM_009102	20132	retinal pigment epithelium derived rhodopsin homolog	-11.9978	-11.9978	0	0.00795484	0.00445212	1	0.0926916	0.383054	1
Dnlz	NM_026828	52838	DNL-type zinc finger	-11.5516	-1.40185	10.1497	0.00375301	0.56269	0.00826115	0.0711799	0.890455	0.117345
Mill2	NM_153761	243864	MHC I like leukocyte 2	-11.9866	-9.10587	2.88072	0.00790136	0.0183198	0.387023	0.0925606	0.386911	0.603488
Nipsnap1	NM_008698	18082	4-nitrophenylphosphatase domain and non-neuronal SNAP25-like protein homolog 1 (C. elegans)	-11.8071	-2.42351	9.38357	0.00334896	0.334851	0.0130083	0.069101	0.75352	0.129033
Cep78	NM_198019	208518	centrosomal protein 78	-11.4229	-1.24133	10.1815	0.00785881	0.639833	0.0141267	0.0922598	0.925112	0.131613
Klra2	NM_008462	16633	killer cell lectin-like receptor, subfamily A, member 2	-11.6035	-1.85682	9.7467	0.00396493	0.45427	0.011056	0.0724118	0.83684	0.12481
A030009H04Rik	NR_027827	80515	RIKEN cDNA A030009H04 gene	-11.5797	-1.7029	9.87685	0.00380395	0.487268	0.00985896	0.071355	0.850195	0.120634
Tmem147	NM_027215	69804	transmembrane protein 147	-10.6252	0.289549	10.9147	0.00783557	0.906262	0.00671348	0.0921114	0.996625	0.113549
Osgep	NM_133676	66246	O-sialoglycoprotein endopeptidase	-11.7573	-2.49387	9.26343	0.00352555	0.323886	0.0141497	0.0696746	0.750015	0.131719
1700052K11Rik	NR_027956	73431	RIKEN cDNA 1700052K11 gene	-11.6564	-2.01981	9.63656	0.0072188	0.458316	0.0186518	0.0889085	0.83985	0.143635
Oscp1	NM_172701	230751	organic solute carrier partner 1	-11.6052	-2.04383	9.56135	0.00469052	0.423509	0.0138516	0.0762758	0.828364	0.131027
Fam89a	NM_001081120	69627	family with sequence similarity 89, member A	-11.0059	-0.287462	10.7184	0.00864362	0.911086	0.00993605	0.0961195	0.997468	0.120823
Plac8	NM_139198	231507	placenta-specific 8	-11.837	-2.75824	9.0788	0.00365459	0.285328	0.0165217	0.070663	0.71644	0.137894
Dpp3	NM_133803	75221	dipeptidylpeptidase 3	-10.3901	0.653095	11.0432	0.0087555	0.790798	0.00617565	0.0968127	0.971139	0.112553
Mir210	NR_029793	387206	microRNA 210	-12.1585	-12.1585	0	0.00736367	0.0041191	1	0.0895648	0.383054	1
Ogfr	NM_031373	72075	opioid growth factor receptor	-11.5713	-1.66779	9.90353	0.00363852	0.493079	0.00935047	0.0705091	0.853988	0.11937
Tgm7	NM_001160424	640543	transglutaminase 7	11.1845	10.391	-0.793508	0.00910288	0.0131373	0.76549	0.0985219	0.38463	0.894354
Lass4	NM_026058	67260	LAG1 homolog, ceramide synthase 4	-10.7806	-0.0106981	10.7699	0.0082873	0.996599	0.00832845	0.0943735	1	0.117345
Ttr	NM_013697	22139	transthyretin	-12.1301	-5.27482	6.85527	0.00909681	0.117005	0.0833318	0.0985219	0.532843	0.265812
Kcnrg	NM_206974	328424	potassium channel regulator	-11.1772	-0.571772	10.6054	0.00889002	0.827605	0.0116331	0.0971829	0.980485	0.126442
Gm7265	NA	NA	NA	-11.862	-2.69411	9.16794	0.00508844	0.317582	0.0197052	0.0782415	0.74648	0.145899
Gpr113	NM_001014394	381628	G protein-coupled receptor 113	-11.7946	-2.14355	9.65102	0.00674791	0.433039	0.018481	0.0868499	0.835037	0.143353
Wdr27	NM_175173	71682	WD repeat domain 27	11.544	10.249	-1.29497	0.00667713	0.012441	0.622456	0.08637	0.383054	0.796401
C1qtnf4	NM_026161	67445	C1q and tumor necrosis factor related protein 4	-12.0918	-12.0918	0	0.00383529	0.00191751	0.99965	0.071355	0.383054	1
Dtl	NM_029766	76843	denticleless homolog (Drosophila)	-11.2084	-0.851885	10.3566	0.00524216	0.727146	0.00832348	0.0793678	0.957287	0.117345
Pabpc5	NM_053114	93728	poly(A) binding protein, cytoplasmic 5	-11.9292	-6.75602	5.17322	0.00925272	0.0584839	0.165956	0.0996058	0.437526	0.378297
Ppp1r14d	NM_028104	72112	protein phosphatase 1, regulatory (inhibitor) subunit 14D	-11.9293	-9.55237	2.37688	0.00807737	0.0152804	0.462362	0.0933575	0.386911	0.669661
Dhdpsl	NA	NA	NA	-11.3284	-1.10574	10.2227	0.00872505	0.678764	0.014582	0.096747	0.942805	0.133603
Wfikkn1	NM_001100454	215001	WAP, FS, Ig, KU, and NTR-containing protein 1	11.8574	4.85252	-7.00491	0.00619359	0.169591	0.039327	0.0838552	0.610661	0.188044
Nusap1	NM_133851	108907	nucleolar and spindle associated protein 1	-10.923	-0.150329	10.7727	0.00711137	0.951664	0.00768487	0.0885143	1	0.11513
H2-Ke2	NM_010385	14976	H2-K region expressed gene 2	-11.6767	-2.57629	9.10041	0.00414271	0.31718	0.0167443	0.0736205	0.746254	0.138647
Dhrs7b	NM_145428	216820	dehydrogenase/reductase (SDR family) member 7B	-11.179	-0.802886	10.3761	0.00905136	0.761156	0.0131872	0.0983097	0.96548	0.12924
Vtcn1	NM_178594	242122	V-set domain containing T cell activation inhibitor 1	-12.1044	-12.1044	0	0.00759406	0.00425198	1	0.0908405	0.383054	1
Tmprss2	NM_015775	50528	transmembrane protease, serine 2	-11.7455	-2.79293	8.95252	0.00696464	0.319861	0.0259108	0.087899	0.748842	0.158723
Gmnn	NM_020567	57441	geminin	-11.7856	-2.54239	9.24319	0.0039674	0.323797	0.0156381	0.0724118	0.750015	0.135487
Timm50	NM_025616	66525	translocase of inner mitochondrial membrane 50 homolog (yeast)	-10.7678	-0.0134215	10.7544	0.00647094	0.995564	0.00651246	0.0852163	1	0.112886
Slc35d3	NM_029529	76157	solute carrier family 35, member D3	-11.8885	-11.8885	0	0.00507825	0.00261406	0.999682	0.0782262	0.383054	1
U46068	NA	NA	NA	-11.6739	-2.53311	9.14082	0.00761237	0.365805	0.0245943	0.0909272	0.782718	0.155835
BC024139	NM_001142968	271278	cDNA sequence BC024139	-11.8937	-11.8937	0	0.00855966	0.0048106	1	0.0955983	0.383054	1
Hddc2	NM_027168	69692	HD domain containing 2	11.7431	8.50103	-3.24208	0.0050595	0.0261651	0.23837	0.0782262	0.392646	0.461716
Mgst3	NM_025569	66447	microsomal glutathione S-transferase 3	-11.4666	-1.41968	10.047	0.00813371	0.597257	0.0157451	0.0936091	0.907005	0.13562
Relb	NM_009046	19698	avian reticuloendotheliosis viral (v-rel) oncogene related B	-11.7355	-2.80215	8.9333	0.0069099	0.317528	0.0259351	0.0877302	0.746447	0.158776
Kcnd2	NM_019697	16508	potassium voltage-gated channel, Shal-related family, member 2	-11.8072	-3.60951	8.19772	0.00721075	0.219146	0.0384153	0.0889085	0.664611	0.186031
Cbr4	NM_145595	234309	carbonyl reductase 4	-11.6105	-1.81237	9.79816	0.00748924	0.503818	0.0174782	0.0902111	0.858725	0.140551
Ifnk	NM_199157	387510	interferon kappa	11.4738	10.1466	-1.32719	0.00627789	0.0120814	0.609089	0.0841373	0.383054	0.785624
Tnfrsf10b	NM_020275	21933	tumor necrosis factor receptor superfamily, member 10b	-11.315	-1.29613	10.0189	0.00877305	0.628757	0.0160269	0.0968741	0.920257	0.136376
Ppargc1b	NM_133249	170826	peroxisome proliferative activated receptor, gamma, coactivator 1 beta	-11.3347	-1.02265	10.312	0.0084308	0.699834	0.0136097	0.0950381	0.950309	0.130356
Coq7	NM_009940	12850	demethyl-Q 7	-10.9463	-0.290806	10.6555	0.00648722	0.905592	0.00756862	0.0852803	0.996375	0.11461
Mare	NA	NA	NA	11.5153	9.40674	-2.10859	0.00779984	0.0207503	0.443566	0.0920996	0.386911	0.660242
Tas1r3	NM_031872	83771	taste receptor, type 1, member 3	-11.055	-0.700221	10.3548	0.00701471	0.780417	0.0100427	0.0881564	0.968415	0.121416
1110038B12Rik	NR_027943	68763	RIKEN cDNA 1110038B12 gene	-10.4526	0.410033	10.8626	0.00730521	0.86428	0.0058089	0.0891514	0.987185	0.111349
Zfp458	NM_001001152	238690	zinc finger protein 458	-11.2794	-0.999131	10.2803	0.00539422	0.685983	0.00919078	0.0805318	0.946356	0.119004
Pars2	NM_172272	230577	prolyl-tRNA synthetase (mitochondrial)(putative)	-11.3016	-1.2422	10.0593	0.00885117	0.642848	0.0157631	0.0969945	0.927375	0.135649
P2rx5	NM_033321	94045	purinergic receptor P2X, ligand-gated ion channel, 5	11.6106	8.77825	-2.83238	0.00815905	0.0294997	0.323491	0.0936601	0.393529	0.546721
Kcnip4	NM_030265	80334	Kv channel interacting protein 4	-11.7521	-3.80826	7.94381	0.00809828	0.205281	0.0454174	0.0934827	0.655225	0.20058
Chsy3	NM_001081328	78923	chondroitin sulfate synthase 3	-11.5151	-1.85898	9.65613	0.00578836	0.47417	0.0148853	0.0819783	0.848767	0.134123
Kifc2	NM_010630	16581	kinesin family member C2	-11.2904	-1.32442	9.96601	0.00517394	0.592753	0.0105667	0.0787037	0.905389	0.122785
AW551984	NM_178737	244810	expressed sequence AW551984	-11.8651	-3.06673	8.79842	0.00685676	0.28308	0.0285696	0.0871747	0.713832	0.164379
Paqr5	NM_028748	74090	progestin and adipoQ receptor family member V	-11.8795	-3.84687	8.03264	0.00631061	0.188917	0.0394201	0.0844539	0.635514	0.188148
Ankrd13d	NM_026720	68423	ankyrin repeat domain 13 family, member D	-11.7254	-3.36515	8.36023	0.0077341	0.249013	0.036273	0.0917107	0.685174	0.181678
Zfp560	NM_001004190	434377	zinc finger protein 560	-10.997	-0.602376	10.3946	0.00840244	0.814535	0.011297	0.0950319	0.976642	0.12484
Pask	NM_080850	269224	PAS domain containing serine/threonine kinase	11.3896	9.69315	-1.69642	0.00800011	0.0176975	0.530084	0.0929856	0.386911	0.723326
Slc16a11	NM_153081	216867	solute carrier family 16 (monocarboxylic acid transporters), member 11	-11.8199	-11.8199	0	0.00910805	0.00514286	0.999673	0.0985219	0.383054	1
Wwox	NM_019573	80707	WW domain-containing oxidoreductase	11.5761	9.05181	-2.52427	0.00738463	0.0240721	0.364612	0.0895799	0.386911	0.58536
Lhx3	NM_001039653	16871	LIM homeobox protein 3	11.7493	0	-11.7493	0.00685418	1	0.00383289	0.0871747	1	0.106221
Scn11a	NM_011887	24046	sodium channel, voltage-gated, type XI, alpha	-11.1505	-1.14271	10.0078	0.00608131	0.647149	0.0111027	0.0833073	0.929391	0.12484
Tcfap2d	NA	NA	NA	-11.7937	-5.79591	5.99782	0.00463781	0.0581157	0.0939942	0.0758155	0.437526	0.283879
Dusp5	NM_001085390	240672	dual specificity phosphatase 5	-11.9953	-5.5062	6.48909	0.00444568	0.0703385	0.0748089	0.0743007	0.455815	0.25211
Il1a	NM_010554	16175	interleukin 1 alpha	11.3705	10.2159	-1.15464	0.00823656	0.0140741	0.665722	0.0942463	0.386911	0.827927
Immp1l	NM_028260	66541	IMP1 inner mitochondrial membrane peptidase-like (S. cerevisiae)	-11.6769	-2.82733	8.8496	0.00356509	0.267798	0.0174824	0.0698729	0.700311	0.140551
Smyd4	NM_001102611	319822	SET and MYND domain containing 4	-11.8128	-3.03183	8.78101	0.00375884	0.246597	0.0196449	0.0711799	0.681353	0.145863
Iqcc	NM_198026	230767	IQ motif containing C	-11.1866	-1.09983	10.0868	0.00489626	0.650202	0.00901209	0.077462	0.930695	0.118726
Ldhc	NM_013580	16833	lactate dehydrogenase C	11.7224	6.90119	-4.82116	0.00732121	0.0683685	0.121946	0.0892293	0.454131	0.323119
Ccdc61	NM_001033314	232933	coiled-coil domain containing 61	-11.4073	-2.02397	9.38332	0.00558459	0.4323	0.0160267	0.0812834	0.834565	0.136376
Gins1	NM_027014	69270	GINS complex subunit 1 (Psf1 homolog)	-11.0629	-1.01045	10.0525	0.00727453	0.690778	0.0121497	0.0889252	0.948339	0.127154
Gm694	NM_001033374	277744	predicted gene 694	-11.877	-11.877	0	0.00427933	0.00213676	0.999405	0.0740815	0.383054	1
Pcsk9	NM_153565	100102	proprotein convertase subtilisin/kexin type 9	-11.8466	-3.28456	8.56206	0.00444926	0.2258	0.0246785	0.0743007	0.664611	0.156045
Wdr90	NM_001163766	106618	WD repeat domain 90	-10.7903	-0.542096	10.2482	0.00846176	0.830166	0.0111285	0.0951346	0.980736	0.12484
Olfr173	NM_147000	259002	olfactory receptor 173	12.1331	0	-12.1331	0.00743268	1	0.00432715	0.0898797	1	0.108049
Gys2	NM_145572	232493	glycogen synthase 2	11.7656	8.35	-3.41557	0.00343258	0.0228786	0.195143	0.0692265	0.386911	0.415144
Srms	NM_011481	20811	src-related kinase lacking C-terminal regulatory tyrosine and N-terminal myristylation sites	12.1293	0	-12.1293	0.00745598	1	0.00434161	0.0900942	1	0.108049
Cyp2c69	NM_001104525	100043108	cytochrome P450, family 2, subfamily c, polypeptide 69	12.0088	7.98321	-4.02556	0.00781849	0.045659	0.192604	0.0921114	0.421925	0.413652
Olfr1342	NM_146713	258708	olfactory receptor 1342	-11.9578	-7.33397	4.6238	0.00684695	0.0365821	0.197431	0.0871747	0.405153	0.417487
Palmd	NM_023245	114301	palmdelphin	-11.6572	-2.34577	9.31144	0.00538614	0.374606	0.017755	0.0804972	0.785057	0.141022
Rhbdd2	NM_146002	215160	rhomboid domain containing 2	-10.7178	-0.314654	10.4031	0.00683966	0.896824	0.00811007	0.0871747	0.995128	0.117149
Aox1	NM_009676	11761	aldehyde oxidase 1	-11.3398	-1.65658	9.6832	0.00449763	0.500611	0.0112848	0.0746674	0.857289	0.12484
Mpp4	NM_145143	227157	membrane protein, palmitoylated 4 (MAGUK p55 subfamily member 4)	10.5147	10.4399	-0.0748303	0.00840655	0.00873418	0.975905	0.0950319	0.383054	1
Rfesd	NM_178916	218341	Rieske (Fe-S) domain containing	-10.3116	0.374321	10.6859	0.00882858	0.878138	0.00720876	0.0969945	0.991243	0.114605
Clec1a	NM_175526	243653	C-type lectin domain family 1, member a	11.5212	8.73546	-2.78573	0.00600743	0.024114	0.305668	0.0831568	0.386973	0.530362
Siah2	NM_009174	20439	seven in absentia 2	-11.1494	-1.20246	9.94697	0.00511347	0.621927	0.0099272	0.0783138	0.916425	0.120823
Snord91a	NR_028562	100217469	small nucleolar RNA, C/D box 91A	-11.6669	-3.71489	7.95204	0.00774255	0.208784	0.0432885	0.0917107	0.659764	0.196508
Ipcef1	NM_001170802	320495	interaction protein for cytohesin exchange factors 1	-10.9169	-0.736211	10.1807	0.0060507	0.76209	0.00903916	0.0833073	0.96548	0.118767
Rg9mtd3	NM_027266	69934	RNA (guanine-9-) methyltransferase domain containing 3	11.4933	8.73933	-2.75392	0.00824747	0.0292429	0.332484	0.0942463	0.393529	0.556499
1700086L19Rik	NR_030735	74284	RIKEN cDNA 1700086L19 gene	-11.7645	-3.55546	8.20904	0.00625148	0.214187	0.0349684	0.0839972	0.66086	0.17891
Polr2h	NM_145632	245841	polymerase (RNA) II (DNA directed) polypeptide H	-11.466	-2.37225	9.09377	0.00443772	0.35025	0.0163024	0.0743007	0.767354	0.137032
Btc	NM_007568	12223	betacellulin, epidermal growth factor family member	-11.6695	-2.81875	8.85071	0.00414932	0.278384	0.0191596	0.0736205	0.710556	0.14457
Myh2	NM_001039545	17882	myosin, heavy polypeptide 2, skeletal muscle, adult	-11.5652	-3.15788	8.40735	0.0055868	0.246966	0.0280812	0.0812834	0.681968	0.163593
Zkscan14	NM_023322	67235	zinc finger with KRAB and SCAN domains 14	11.7308	9.08091	-2.64987	0.00392978	0.016402	0.306192	0.0721742	0.386911	0.530974
Ccl25	NR_033527	20300	chemokine (C-C motif) ligand 25	-11.7653	-3.51666	8.24867	0.00602982	0.215896	0.033598	0.0832376	0.663269	0.176261
Cxcr7	NM_007722	12778	chemokine (C-X-C motif) receptor 7	-11.6216	-3.84627	7.77536	0.00425407	0.157714	0.0344784	0.0740057	0.592609	0.177833
Olfr631	NM_146959	258961	olfactory receptor 631	12.0227	0	-12.0227	0.00811246	1	0.00474924	0.0935341	1	0.108954
Skint3	NM_177578	195564	selection and upkeep of intraepithelial T cells 3	-11.4064	-2.48783	8.91856	0.00561	0.343117	0.0205242	0.0813328	0.761318	0.147386
1700054N08Rik	NM_028536	73420	RIKEN cDNA 1700054N08 gene	-11.7881	-4.6352	7.1529	0.00742529	0.134147	0.0633192	0.0898489	0.562337	0.232325
Pcdhb7	NM_053132	93878	protocadherin beta 7	11.1851	9.45708	-1.72803	0.00619173	0.0151301	0.500438	0.0838552	0.386911	0.697749
Arhgef15	NM_177566	442801	Rho guanine nucleotide exchange factor (GEF) 15	-11.4054	-2.48263	8.92279	0.00544423	0.341792	0.0200558	0.0809084	0.760074	0.14645
Fzd8	NM_008058	14370	frizzled homolog 8 (Drosophila)	11.2821	9.26839	-2.01374	0.00897041	0.0226735	0.465175	0.0976591	0.386911	0.672528
Tmem22	NM_001101483	245020	transmembrane protein 22	-11.3892	-2.27482	9.11441	0.00895032	0.414457	0.0254563	0.0975072	0.821741	0.157694
Tnfrsf11b	NM_008764	18383	tumor necrosis factor receptor superfamily, member 11b (osteoprotegerin)	11.5662	3.80266	-7.76353	0.00805646	0.270685	0.0305848	0.0931738	0.702603	0.169215
Galnt9	NM_198306	231605	UDP-N-acetyl-alpha-D-galactosamine:polypeptide N-acetylgalactosaminyltransferase 9	11.7129	8.93982	-2.77312	0.00777674	0.0273506	0.332421	0.0919693	0.392646	0.556499
Sac3d1	NM_133678	66406	SAC3 domain containing 1	11.3816	8.73869	-2.64287	0.00921439	0.0304143	0.35461	0.0993826	0.393529	0.575574
Pnliprp1	NM_018874	18946	pancreatic lipase related protein 1	10.9871	9.8149	-1.17218	0.00792195	0.0141709	0.650016	0.0926494	0.386911	0.815684
Colq	NM_009937	382864	collagen-like tail subunit (single strand of homotrimer) of asymmetric acetylcholinesterase	-11.7889	-11.7889	0	0.00557233	0.00288854	0.999426	0.0812834	0.383054	1
Ckmt2	NM_198415	76722	creatine kinase, mitochondrial 2	11.971	0	-11.971	0.00636858	1	0.00358047	0.0847652	1	0.105473
Mylk3	NM_175441	213435	myosin light chain kinase 3	-11.6287	-3.15068	8.47802	0.0086284	0.280875	0.0357339	0.096077	0.710912	0.180551
Tmie	NM_146260	20776	transmembrane inner ear	11.9555	4.79561	-7.15992	0.00676009	0.178875	0.0403428	0.086898	0.623643	0.190345
Pddc1	NM_172116	213350	Parkinson disease 7 domain containing 1	-11.5356	-2.54417	8.99142	0.00842693	0.366839	0.0270632	0.0950381	0.783756	0.161891
Pzp	NM_007376	11287	pregnancy zone protein	11.3975	8.50097	-2.89653	0.00884357	0.0331994	0.312864	0.0969945	0.39939	0.537722
Gldc	NM_138595	104174	glycine decarboxylase	10.8973	10.0887	-0.80863	0.00603836	0.00935042	0.740956	0.083272	0.383054	0.87877
Adam3	NM_009619	11497	a disintegrin and metallopeptidase domain 3 (cyritestin)	-10.9094	-1.01434	9.89509	0.00720775	0.685769	0.0122293	0.0889085	0.946356	0.127154
Pi15	NM_053191	94227	peptidase inhibitor 15	11.8143	4.50809	-7.30625	0.00525617	0.193198	0.0298829	0.0793858	0.639449	0.167276
Ifitm1	NM_026820	68713	interferon induced transmembrane protein 1	-11.2443	-1.93147	9.31282	0.00535376	0.444021	0.0151616	0.080207	0.836053	0.134902
Slc9a5	NM_001081332	277973	solute carrier family 9 (sodium/hydrogen exchanger), member 5	-11.5614	-5.66664	5.89477	0.00885103	0.0846934	0.115353	0.0969945	0.488599	0.313863
Lrch2	NM_001081173	210297	leucine-rich repeats and calponin homology (CH) domain containing 2	-11.4106	-2.79375	8.61682	0.00481431	0.282749	0.0218951	0.0771386	0.71358	0.151217
9430070O13Rik	NA	NA	NA	11.493	7.06735	-4.42562	0.00500381	0.0514271	0.120563	0.0780511	0.426164	0.321076
Hlcs	NM_139145	110948	holocarboxylase synthetase (biotin- [propriony-Coenzyme A-carboxylase (ATP-hydrolysing)] ligase)	-10.4465	-0.131354	10.3151	0.00831755	0.957128	0.00891736	0.0946019	1	0.118316
5031426D15Rik	NR_027890	68144	RIKEN cDNA 5031426D15 gene	-11.6774	-3.8276	7.8498	0.00525447	0.173233	0.0373457	0.0793858	0.614712	0.183949
Sncb	NM_033610	104069	synuclein, beta	11.9075	4.97322	-6.93429	0.00713162	0.166301	0.0457497	0.0885143	0.604337	0.201107
Slc23a1	NM_011397	20522	solute carrier family 23 (nucleobase transporters), member 1	-11.3863	-3.0606	8.32565	0.00666955	0.265815	0.0308103	0.08637	0.700311	0.169634
Pmaip1	NM_021451	58801	phorbol-12-myristate-13-acetate-induced protein 1	-11.0643	-1.20286	9.86147	0.0070912	0.635982	0.0131248	0.0885143	0.922998	0.129033
Ksr2	NM_001114545	333050	kinase suppressor of ras 2	-11.5423	-3.09511	8.44717	0.00665533	0.266418	0.0303001	0.0862683	0.700311	0.168544
Fsd1l	NM_176966	319636	fibronectin type III and SPRY domain containing 1-like	11.8358	7.00876	-4.82704	0.00521063	0.057904	0.106911	0.0790839	0.437526	0.30239
D130017N08Rik	NR_015486	320064	RIKEN cDNA D130017N08 gene	-11.28	-2.44658	8.83346	0.00570515	0.346954	0.0207765	0.0818	0.764146	0.147873
Tac1	NM_009311	21333	tachykinin 1	-11.558	-5.9048	5.65323	0.00678666	0.0642034	0.119295	0.087119	0.446513	0.319395
Stk19	NM_019442	54402	serine/threonine kinase 19	-10.9821	-1.11191	9.87016	0.00804568	0.665189	0.0140239	0.0931653	0.936529	0.131373
Ly6g6d	NM_033478	114654	lymphocyte antigen 6 complex, locus G6D	10.9225	9.63367	-1.28882	0.00814512	0.0154594	0.61858	0.0936091	0.386911	0.792907
Zfp831	NM_001099328	100043757	zinc finger protein 831	11.3305	9.34401	-1.98647	0.00692488	0.0183847	0.45471	0.0877727	0.386911	0.666812
Nt5dc3	NM_175331	103466	5'-nucleotidase domain containing 3	-11.0151	-1.55274	9.46237	0.00682411	0.540886	0.0153466	0.0871747	0.881159	0.135204
Zwilch	NM_026507	68014	Zwilch, kinetochore associated, homolog (Drosophila)	-10.8629	-0.948	9.91491	0.00728188	0.704378	0.0119556	0.0889252	0.951225	0.127154
Intu	NM_175515	380614	inturned planar cell polarity effector homolog (Drosophila)	-11.2405	-2.6286	8.61187	0.00624163	0.320655	0.0244302	0.0839972	0.749434	0.155695
Dnd1	NM_173383	213236	dead end homolog 1 (zebrafish)	-11.4183	-3.05818	8.36017	0.00582392	0.258047	0.0282377	0.0822081	0.696506	0.163917
Siva1	NM_013929	30954	SIVA1, apoptosis-inducing factor	-10.7195	-0.818227	9.9013	0.00727227	0.739822	0.0112634	0.0889252	0.960529	0.12484
Nans	NM_053179	94181	N-acetylneuraminic acid synthase (sialic acid synthase)	10.3673	10.0737	-0.293624	0.00873895	0.0102004	0.90518	0.0968127	0.383054	0.975027
Il22ra1	NM_178257	230828	interleukin 22 receptor, alpha 1	-11.3926	-6.27512	5.11745	0.00595228	0.0465473	0.146954	0.0830723	0.423217	0.355053
Prr16	NM_001081224	71373	proline rich 16	11.6867	6.96141	-4.72531	0.00914554	0.0725326	0.140255	0.0987647	0.461079	0.34785
Zic2	NM_009574	22772	zinc finger protein of the cerebellum 2	11.7042	5.73674	-5.96745	0.00461514	0.103291	0.0528409	0.0755881	0.514755	0.212618
AI467606	NM_178901	101602	expressed sequence AI467606	-10.6143	-0.679637	9.93463	0.00811785	0.784028	0.0116068	0.0935341	0.969045	0.126361
AI747448	NM_001033199	99709	expressed sequence AI747448	11.5057	8.37065	-3.13507	0.00620795	0.0294259	0.257977	0.0838743	0.393529	0.481081
Gm129	NM_001033302	229599	predicted gene 129	-11.2852	-2.49185	8.79331	0.00637219	0.346956	0.0228657	0.0847652	0.764146	0.153003
Atg4a	NM_174875	666468	autophagy-related 4A (yeast)	-10.8596	-1.40049	9.4591	0.00727824	0.578809	0.0151741	0.0889252	0.898841	0.134902
Tdpoz4	NM_207272	399675	TD and POZ domain containing 4	-11.5142	-11.5142	0	0.00684051	0.00358585	0.999489	0.0871747	0.383054	1
Oaz3	NM_016901	53814	ornithine decarboxylase antizyme 3	-10.7775	-1.25727	9.52022	0.00722467	0.614249	0.0141027	0.0889085	0.912987	0.131611
Lypd5	NM_029806	76942	Ly6/Plaur domain containing 5	11.1827	7.23048	-3.95219	0.00889903	0.0572954	0.183005	0.0972241	0.437526	0.400914
Lamb1-1	NA	NA	NA	-10.805	-1.21671	9.58827	0.00712772	0.625471	0.0136101	0.0885143	0.918281	0.130356
Peg12	NM_013788	27412	paternally expressed 12	-11.4696	-11.4696	0	0.00737066	0.00389971	0.999498	0.0895648	0.383054	1
Scml4	NM_172938	268297	sex comb on midleg-like 4 (Drosophila)	-11.12	-2.85849	8.26152	0.00784968	0.296848	0.0324279	0.0922189	0.727199	0.173117
Stk30	NM_011973	26448	serine/threonine kinase 30	-11.2136	-2.60178	8.61182	0.00600395	0.321369	0.0236173	0.0831568	0.749786	0.154742
Timm10	NM_013899	30059	translocase of inner mitochondrial membrane 10 homolog (yeast)	-11.1991	-2.6766	8.52254	0.00656112	0.314847	0.0260515	0.0855249	0.744278	0.159192
Myh7b	NM_001085378	668940	myosin, heavy chain 7B, cardiac muscle, beta	-10.7613	-1.29921	9.46213	0.00850144	0.611482	0.0164681	0.0952921	0.912514	0.137508
Gm5065	NR_003622	272350	predicted gene 5065	11.6	6.50177	-5.09826	0.0069799	0.079283	0.101223	0.0879572	0.474879	0.294823
Rasl11b	NM_026878	68939	RAS-like, family 11, member B	-10.9316	-2.07848	8.8531	0.00737641	0.423342	0.021657	0.0895648	0.828125	0.150279
Olfr543	NM_001011782	257947	olfactory receptor 543	-11.2047	-6.51393	4.69074	0.00886291	0.0505627	0.187971	0.0970008	0.425644	0.406941
Tmx2	NM_025868	66958	thioredoxin-related transmembrane protein 2	-10.605	-1.12694	9.47807	0.00851551	0.654238	0.0153204	0.0953347	0.933297	0.13516
Zfp566	NM_152814	72556	zinc finger protein 566	-10.9929	-2.63116	8.36175	0.00681686	0.317401	0.0271675	0.0871747	0.746303	0.162003
Tsnaxip1	NM_024445	72236	translin-associated factor X (Tsnax) interacting protein 1	-11.328	-4.87568	6.45233	0.00668969	0.102109	0.0780823	0.0864721	0.513139	0.257088
Trpv3	NM_145099	246788	transient receptor potential cation channel, subfamily V, member 3	10.5244	9.54538	-0.979062	0.0084344	0.0140591	0.695939	0.0950381	0.386911	0.848085
Ccl6	NM_009139	20305	chemokine (C-C motif) ligand 6	11.0338	9.04082	-1.99298	0.00748709	0.0203652	0.448787	0.0902111	0.386911	0.664994
Anxa9	NM_023628	71790	annexin A9	-10.3492	-0.680716	9.66845	0.0092984	0.783585	0.0133158	0.0998247	0.968949	0.129514
Trhde	NM_146241	237553	TRH-degrading enzyme	11.0507	6.10288	-4.94779	0.00712913	0.0885191	0.0966606	0.0885143	0.49679	0.287857
Pglyrp4	NM_207263	384997	peptidoglycan recognition protein 4	11.2835	7.79607	-3.48741	0.0070356	0.0395499	0.216442	0.0883371	0.411185	0.441661
Oca2	NM_021879	18431	oculocutaneous albinism II	-11.2303	-11.2303	0	0.00795299	0.00417379	0.999547	0.0926916	0.383054	1
Peo1	NM_153796	226153	progressive external ophthalmoplegia 1 (human)	-10.8765	-2.57579	8.30068	0.0087823	0.341244	0.0316701	0.0969186	0.759832	0.171289
Psmg1	NM_019537	56088	proteasome (prosome, macropain) assembly chaperone 1	-11.0016	-2.62201	8.37961	0.00696481	0.320776	0.0273442	0.087899	0.749622	0.162548
Ulk3	NM_027895	71742	unc-51-like kinase 3 (C. elegans)	-10.5337	-1.24228	9.29146	0.0085099	0.620306	0.016383	0.0953294	0.915653	0.137044
Robo3	NM_001164767	19649	roundabout homolog 3 (Drosophila)	-11.1344	-8.76308	2.3713	0.00804447	0.0153693	0.457184	0.0931653	0.386911	0.666812
Olfr576	NM_001001805	258248	olfactory receptor 576	-11.1036	-11.1036	0	0.00825669	0.0043114	0.999572	0.0942562	0.383054	1
Ankrd33b	NM_027496	67434	ankyrin repeat domain 33B	-10.8856	-2.77613	8.10943	0.00727577	0.295104	0.0312173	0.0889252	0.725901	0.170285
Tll2	NM_011904	24087	tolloid-like 2	10.7129	8.25974	-2.4532	0.00848673	0.0295944	0.356542	0.095229	0.393529	0.577466
Limk1	NM_010717	16885	LIM-domain containing, protein kinase	-10.4728	-1.46812	9.00466	0.00904874	0.562296	0.0195111	0.0983097	0.890335	0.145629
Rnf25	NM_021313	57751	ring finger protein 25	-10.6324	-1.86841	8.76399	0.00908008	0.472351	0.0235641	0.0985063	0.84762	0.154557
1110049B09Rik	NA	NA	NA	-10.7937	-3.92991	6.86381	0.00814957	0.163707	0.0617689	0.0936091	0.601556	0.229357
Dhx37	NM_203319	208144	DEAH (Asp-Glu-Ala-His) box polypeptide 37	-10.7561	-4.46243	6.29367	0.00927377	0.129726	0.0858713	0.0997333	0.554962	0.270279
